# Supplementary material for: Carbogen treatment for pH-stat management in cardiopulmonary bypass / Vijay Sundra Kumuran
Source: publisher site journal article supplement (doi:10.3762/bjoc.10.98), 2012-01-01

**Supporting Information**  
**for**  
**Regioselective S<sub>N</sub>2' Mitsunobu reaction of**  
**Morita–Baylis–Hillman alcohols: A facile and**  
**stereoselective synthesis of  $\alpha$ -alkylidene- $\beta$ -hydrazino**  
**acid derivatives**

Silong Xu\*, Jian Shang, Junjie Zhang and Yuhai Tang\*

Address: Department of Chemistry, School of Science, Xi'an Jiaotong University,  
Xi'an 710049, P. R. China

Email: Silong Xu - silongxu@mail.xjtu.edu.cn; Yuhai Tang - tyh57@mail.xjtu.edu.cn

\* Corresponding author

**Experimental details on the synthesis of all hydrazines **3** and *1H*-pyrazole **7**, full characterization data and <sup>1</sup>H, <sup>13</sup>C, DEPT NMR spectra for all compounds **3** and **7**, and a mechanistic rationale for the formation of **7**.**

**Table of contents**

|                                                                                     |     |
|-------------------------------------------------------------------------------------|-----|
| 1. Analytical data for compounds <b>3b–s</b> .....                                  | S2  |
| 2. Analytical data for <i>1H</i> -pyrazole <b>7</b> and mechanistic rationale ..... | S11 |
| 3. Copies of <sup>1</sup> H, <sup>13</sup> C, DEPT, and NOESY NMR spectra .....     | S13 |

## 1. Analytical data for compounds 3b–s<sup>1</sup>

**Table 2, entry 1.** Following the general procedure, the reaction of MBH alcohol **1a** (62 mg, 0.3 mmol), PPh<sub>3</sub> (157 mg, 0.6 mmol) and diethyl azodicarboxylate **2b** (94 μL, 0.6 mmol) was performed for 25 minutes.

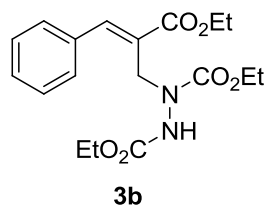

**3b:** 107 mg, 98% yield, as slightly yellow oil; <sup>1</sup>H NMR (400 MHz, CDCl<sub>3</sub>) δ 7.89 (s, H), 7.37 (m, 5H), 6.75 (br m, 1H), 4.64 (s, 2H), 4.27 (q, *J* = 7.1 Hz, 2H), 4.11 (m, 4H), 1.33 (t, *J* = 7.1 Hz, 3H), 1.22 (m, 6H); <sup>13</sup>C NMR (100 MHz, CDCl<sub>3</sub>) δ 167.6, 156.0(2C), 143.7, 134.5, 129.3, 128.9, 128.5, 127.3, 62.5, 61.9, 61.1, 46.6, 14.41, 14.37, 14.2; IR (KBr): ν<sub>max</sub> 3433, 2983, 1638, 1401, 1124 cm<sup>-1</sup>; HRMS (ESI) calcd for C<sub>18</sub>H<sub>25</sub>N<sub>2</sub>O<sub>6</sub> [M+H]<sup>+</sup> requires 365.1713, found 365.1712.

**Table 2, entry 2.** Following the general procedure, the reaction of MBH alcohol **1b** (58 mg, 0.3 mmol), PPh<sub>3</sub> (157 mg, 0.6 mmol) and diethyl azodicarboxylate **2b** (94 μL, 0.6 mmol) was performed for 25 minutes.

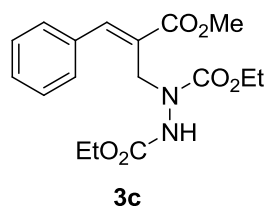

**3c:** 100 mg, 95% yield, as yellow oil; <sup>1</sup>H NMR (400 MHz, CDCl<sub>3</sub>) δ 7.90 (s, 1H), 7.36 (m, 5H), 6.61 (br m, 1H), 4.65 (s, 2H), 4.18 (m, 4H), 3.83 (s, 3H), 1.29 (m, 6H); <sup>13</sup>C NMR (100 MHz, CDCl<sub>3</sub>) δ 168.0, 155.9(2C), 143.9, 134.3, 129.2, 128.9, 128.4, 127.0, 62.4, 61.7, 52.1, 46.5, 14.3(2C); IR (KBr): ν<sub>max</sub> 3430, 2980, 1711, 1401, 1125 cm<sup>-1</sup>; HRMS (ESI) calcd for C<sub>17</sub>H<sub>23</sub>N<sub>2</sub>O<sub>6</sub> [M+H]<sup>+</sup> requires 351.1556, found 351.1557.

<sup>1</sup> Rotamers were often observed in the <sup>1</sup>H and <sup>13</sup>C NMR spectra of compounds **3**.

**Table 2, entry 3.** Following the general procedure, the reaction of MBH alcohol **1b** (58 mg, 0.3 mmol), PPh<sub>3</sub> (157 mg, 0.6 mmol) and di-*tert*-butyl azodicarboxylate **2c** (138 mg, 0.6 mmol) was performed for 50 minutes.

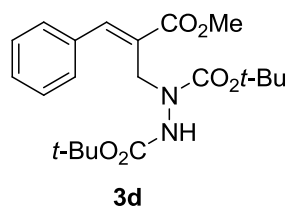

**3d:** 116 mg, 95% yield, as colorless oil; <sup>1</sup>H NMR (400 MHz, CDCl<sub>3</sub>) δ 7.77 (s, 1H), 7.28 (m, 5H), 6.32 (br m, 1H), 4.53 (s, 2H), 3.72 (s, 3H), 1.35 (m, 18H); <sup>13</sup>C NMR (100 MHz, CDCl<sub>3</sub>) δ 168.0, 155.7, 154.9, 143.5, 134.3, 129.3, 128.8, 128.3, 127.2, 80.9, 80.6, 51.9, 45.1, 27.9(2C); IR (KBr): ν<sub>max</sub> 3435, 2981, 1639, 1401, 1122 cm<sup>-1</sup>; HRMS (ESI) calcd for C<sub>21</sub>H<sub>30</sub>N<sub>2</sub>NaO<sub>6</sub> [M+Na]<sup>+</sup> requires 429.2002, found 429.1995.

**Table 2, entry 4.** Following the general procedure, the reaction of MBH alcohol **1c** (66 mg, 0.3 mmol), PPh<sub>3</sub> (157 mg, 0.6 mmol) and diethyl azodicarboxylate **2b** (94 μL, 0.6 mmol) was performed for 35 minutes.

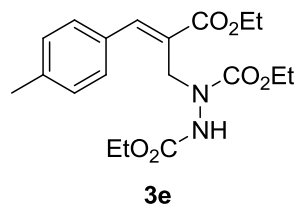

**3e:** 92 mg, 81% yield, as yellow oil; <sup>1</sup>H NMR (400 MHz, CDCl<sub>3</sub>) δ 7.77 (s, 1H), 7.20 (br s, 2H), 7.08 (d, *J* = 7.9 Hz, 2H), 6.78 (br m, 1H), 4.56 (s, 2H), 4.16 (q, *J* = 7.1 Hz, 2H), 4.03 (m, 4H), 2.25 (s, 3H), 1.23 (t, *J* = 7.1 Hz, 3H), 1.11 (m, 6H); <sup>13</sup>C NMR (100 MHz, CDCl<sub>3</sub>) δ 167.5, 155.8(2C), 143.7, 138.9, 131.4, 129.3, 129.0, 126.1, 62.1, 61.5, 60.8, 46.0, 21.0, 14.2, 14.1, 13.9; IR (KBr): ν<sub>max</sub> 3413, 2981, 1710, 1401, 1124 cm<sup>-1</sup>; HRMS (ESI) calcd for C<sub>19</sub>H<sub>27</sub>N<sub>2</sub>O<sub>6</sub> [M+H]<sup>+</sup> requires 379.1869, found 379.1867.

**Table 2, entry 5.** Following the general procedure, the reaction of MBH alcohol **1d** (72 mg, 0.3 mmol), PPh<sub>3</sub> (157 mg, 0.6 mmol) and diethyl azodicarboxylate **2b** (94 μL, 0.6 mmol) was performed for 35 minutes.

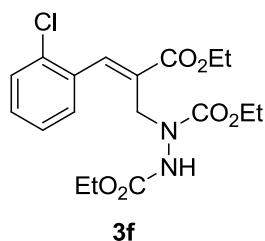

**3f:** 104 mg, 87 % yield, as slightly yellow oil;  $^1\text{H}$  NMR (400 MHz,  $\text{CDCl}_3$ )  $\delta$  7.94 (s, 1H), 7.33 (m, 4H), 6.61 (br m, 1H), 4.52 (s, 2H), 4.30 (q,  $J = 7.1$  Hz, 2H), 4.11 (m, 4H), 1.35 (t,  $J = 7.2$  Hz, 3H), 1.23 (m, 6H);  $^{13}\text{C}$  NMR (100 MHz,  $\text{CDCl}_3$ )  $\delta$  166.9, 155.9(2C), 140.9, 133.7, 133.2, 130.3, 129.9, 129.4(2C), 126.6, 62.4, 61.8, 61.2, 46.8, 14.3(2C), 14.1; IR (KBr):  $\nu_{\text{max}}$  3422, 2985, 1717, 1401, 1136 $\text{cm}^{-1}$ ; HRMS (ESI) calcd for  $\text{C}_{18}\text{H}_{24}\text{ClN}_2\text{O}_6$   $[\text{M}+\text{H}]^+$  requires 399.1323, found 399.1324.

**Table 2, entry 6.** Following the general procedure, the reaction of MBH alcohol **1e** (72 mg, 0.3 mmol),  $\text{PPh}_3$  (157 mg, 0.6 mmol) and diethyl azodicarboxylate **2b** (94  $\mu\text{L}$ , 0.6 mmol) was performed for 30 minutes.

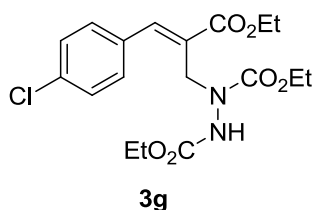

**3g:** 109 mg, 91% yield, as colorless oil;  $^1\text{H}$  NMR (400 MHz,  $\text{CDCl}_3$ )  $\delta$  7.82 (s, 1H), 7.35 (m, 4H), 6.92 (br m, 1H), 4.61 (s, 2H), 4.27 (q,  $J = 7.1$  Hz, 2H), 4.13 (m, 4H), 1.33 (t,  $J = 7.1$  Hz, 3H), 1.21 (m, 6H);  $^{13}\text{C}$  NMR (100 MHz,  $\text{CDCl}_3$ )  $\delta$  167.1, 155.8(2C), 142.2, 134.8, 132.9, 130.5, 128.6, 127.9, 62.3, 61.7, 61.0, 46.1, 14.3, 14.2, 14.0; IR (KBr):  $\nu_{\text{max}}$  3448, 2985, 1712, 1401, 1124  $\text{cm}^{-1}$ ; HRMS (ESI) calcd for  $\text{C}_{18}\text{H}_{24}\text{ClN}_2\text{O}_6$   $[\text{M}+\text{H}]^+$  requires 399.1323, found 399.1320.

**Table 2, entry 7.** Following the general procedure, the reaction of MBH alcohol **1f** (63 mg, 0.3 mmol),  $\text{PPh}_3$  (157 mg, 0.6 mmol) and diethyl azodicarboxylate **2b** (94  $\mu\text{L}$ , 0.6 mmol) was performed for 30 minutes.

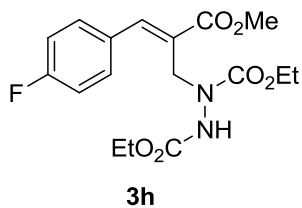

**3h**: 87 mg, 79% yield, as yellow oil;  $^1\text{H}$  NMR (400 MHz,  $\text{CDCl}_3$ )  $\delta$  7.76 (s, 1H), 7.33 (br s, 2H), 7.00 (m, 2H), 6.76 (br s, 1H), 4.53 (s, 2H), 4.06 (m, 4H), 3.72 (s, 3H), 1.15 (m, 6H);  $^{13}\text{C}$  NMR (100 MHz,  $\text{CDCl}_3$ )  $\delta$  167.8, 162.9 (d,  $J_{\text{C-F}} = 250.2$  Hz), 155.9(2C), 142.7, 131.3 (d,  $J_{\text{C-F}} = 7.5$  Hz), 130.4, 126.8, 115.5 (d,  $J_{\text{C-F}} = 21.7$  Hz), 62.38, 61.73, 52.03, 46.27, 14.25, 14.19; IR (KBr):  $\nu_{\text{max}}$  3170, 2984, 1718, 1401, 1124  $\text{cm}^{-1}$ ; HRMS (ESI) calcd for  $\text{C}_{17}\text{H}_{22}\text{FN}_2\text{O}_6$   $[\text{M}+\text{H}]^+$  requires 369.1462, found 369.1464.

**Table 2, entry 8.** Following the general procedure, the reaction of MBH alcohol **1g** (75 mg, 0.3 mmol),  $\text{PPh}_3$  (157 mg, 0.6 mmol) and di-*tert*-butyl azodicarboxylate **2c** (138 mg, 0.6 mmol) was performed for 40 minutes.

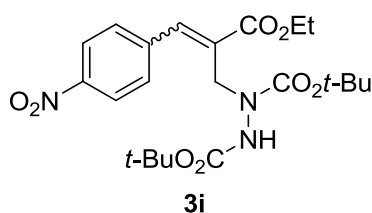

**3i**: obtained as an inseparable mixture of *E/Z* isomers (*E/Z* 3:1) in 120 mg, 86% yield, as colorless oil; NMR data for *E*-**3i**:  $^1\text{H}$  NMR (400 MHz,  $\text{CDCl}_3$ )  $\delta$  8.23 (d,  $J = 8.2$  Hz, 2H), 7.85 (s, 1H), 7.61 (m, 2H), 6.39 (br m, 1H), 4.56 (s, 2H), 4.30 (q,  $J = 7.1$  Hz, 2H), 1.46 (m, 18H), 1.36 (t,  $J = 7.1$  Hz, 3H);  $^{13}\text{C}$  NMR (100 MHz,  $\text{CDCl}_3$ )  $\delta$  166.8, 154.8(2C), 147.4, 141.1, 140.3, 130.0, 129.0, 123.4, 81.3, 81.0, 61.2, 45.3, 27.9(2C), 14.0; selected NMR data for *Z*-**3i**:  $^1\text{H}$  NMR (400 MHz,  $\text{CDCl}_3$ )  $\delta$  8.18 (d,  $J = 8.3$  Hz, 2H), 7.46 (d,  $J = 8.3$  Hz, 2H), 6.94 (s, 1H), 4.48 (s, 2H), 4.16 (q,  $J = 7.1$  Hz, 2H);  $^{13}\text{C}$  NMR (100 MHz,  $\text{CDCl}_3$ )  $\delta$  147.0, 142.1, 131.1, 123.1, 61.1, 13.6; IR (KBr):  $\nu_{\text{max}}$  3433, 2986, 1521, 1710, 1401, 1369, 1122  $\text{cm}^{-1}$ ; HRMS (ESI) calcd for  $\text{C}_{22}\text{H}_{31}\text{N}_3\text{NaO}_8$   $[\text{M}+\text{Na}]^+$  requires 488.2009, found 488.2003.

**Table 2, entry 9.** Following the general procedure, the reaction of MBH alcohol **1h**

(47 mg, 0.3 mmol), PPh<sub>3</sub> (157 mg, 0.6 mmol) and diisopropyl azodicarboxylate **2a** (118 μL, 0.6 mmol) was performed for 30 minutes.

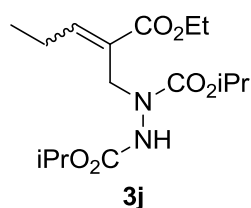

**3j**: obtained as an inseparable mixture of *E/Z* isomers (*E/Z* 9:1) in 83 mg, 80 % yield, as slightly yellow oil; NMR data for *E*-**3j**: <sup>1</sup>H NMR (400 MHz, CDCl<sub>3</sub>) δ 6.98 (t, *J* = 7.0 Hz, 1H), 6.56 (br m, 1H), 5.00 (m, 2H), 4.35 (m, 2H), 4.19 (q, *J* = 7.1 Hz, 2H), 2.31 (br s, 2H), 1.29 (t, *J* = 7.1 Hz, 3H), 1.25 (m, 12H), 1.06 (t, *J* = 7.6 Hz, 3H); <sup>13</sup>C NMR (100 MHz, CDCl<sub>3</sub>) δ 167.0, 155.4(2C), 149.8, 126.3, 69.7, 69.3, 60.5, 44.9, 21.9, 21.81, 21.76, 14.1, 13.1; selected NMR data for *Z*-**3j**: <sup>1</sup>H NMR (400 MHz, CDCl<sub>3</sub>) δ 6.10 (br s, 1H), 4.29 (s, 2H), 2.51 (m, 2H); <sup>13</sup>C NMR (100 MHz, CDCl<sub>3</sub>) δ 149.5, 126.2, 70.3, 60.3, 44.5, 21.6, 13.5; IR (KBr): ν<sub>max</sub> 3437, 2982, 1715, 1401, 1135 cm<sup>-1</sup>; HRMS (ESI) calcd for C<sub>16</sub>H<sub>29</sub>N<sub>2</sub>O<sub>6</sub> [M+H]<sup>+</sup> requires 345.2026, found 345.2020.

**Table 2, entry 10.** Following the general procedure, the reaction of MBH alcohol **1h** (47 mg, 0.3 mmol), PPh<sub>3</sub> (157 mg, 0.6 mmol) and diethyl azodicarboxylate **2b** (94 μL, 0.6 mmol) was performed for 20 minutes.

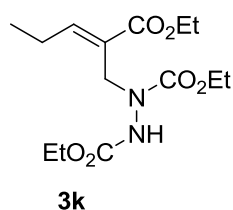

**3k**: 78 mg, 82% yield, as colorless oil; <sup>1</sup>H NMR (400 MHz, CDCl<sub>3</sub>) δ 6.99 (m, 2H), 4.43 (s, 2H), 4.18 (m, 6H), 2.32 (br s, 2H), 1.28 (m, 9H), 1.06 (t, *J* = 7.5 Hz, 3H); <sup>13</sup>C NMR (100 MHz, CDCl<sub>3</sub>) δ 166.9, 155.7(2C), 149.7, 126.0, 62.1, 61.6, 60.5, 45.0, 21.6, 14.3, 14.2, 13.9, 12.9; IR (KBr): ν<sub>max</sub> 3434, 2983, 1712, 1401, 1124 cm<sup>-1</sup>; HRMS (ESI) calcd for C<sub>14</sub>H<sub>25</sub>N<sub>2</sub>O<sub>6</sub> [M+H]<sup>+</sup> requires 317.1713, found 317.1712.

**Table 2, entry 11.** Following the general procedure, the reaction of MBH alcohol **1i** (43 mg, 0.3 mmol), PPh<sub>3</sub> (157 mg, 0.6 mmol) and diethyl azodicarboxylate **2b** (94 μL, 0.6 mmol) was performed for 25 minutes.

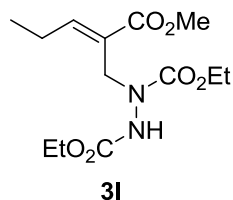

**3l:** 72 mg, 80% yield, as slightly yellow oil; <sup>1</sup>H NMR (400 MHz, CDCl<sub>3</sub>) δ 6.94 (m, 2H), 4.37 (s, 2H), 4.13 (m, 4H), 3.69 (s, 3H), 2.28 (m, 2H), 1.22 (t, *J* = 7.1 Hz, 6H), 1.02 (t, *J* = 7.5 Hz, 3H); <sup>13</sup>C NMR (100 MHz, CDCl<sub>3</sub>) δ 167.4, 156.0(2C), 150.3, 125.8, 62.2, 61.6, 51.7, 45.2, 21.7, 14.33, 14.28, 13.0; IR (KBr): ν<sub>max</sub> 3448, 2981, 1718, 1401, 1122 cm<sup>-1</sup>; HRMS (ESI) calcd for C<sub>13</sub>H<sub>23</sub>N<sub>2</sub>O<sub>6</sub> [M+H]<sup>+</sup> requires 303.1556, found 303.1554.

**Table 2, entry 12.** Following the general procedure, the reaction of MBH alcohol **1i** (43 mg, 0.3 mmol), PPh<sub>3</sub> (157 mg, 0.6 mmol) and diisopropyl azodicarboxylate **2a** (118 μL, 0.6 mmol) was performed for 30 minutes.

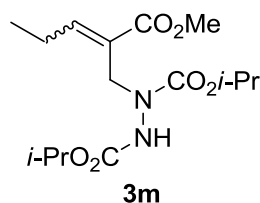

**3m:** obtained as an inseparable mixture of *E/Z* isomers (*E/Z* 13:1) in 80 mg, 81% yield, as slightly yellow oil; NMR data for *E*-**3m**: <sup>1</sup>H NMR (400 MHz, CDCl<sub>3</sub>) δ 6.98 (br s, 1H), 6.54 (br m, 1H), 4.95 (m, 2H), 4.41 (s, 2H), 3.74 (s, 3H), 2.31 (m, 2H), 1.26 (m, 12H), 1.06 (t, *J* = 7.4 Hz, 3H); <sup>13</sup>C NMR (100 MHz, CDCl<sub>3</sub>) δ 167.4, 155.6(2C), 150.2, 126.0, 69.8, 69.3, 51.7, 45.0, 21.9, 21.8, 21.5, 13.0; selected NMR data for *Z*-**3m**: <sup>1</sup>H NMR (400 MHz, CDCl<sub>3</sub>) δ 6.12 (br s, 1H), 4.19 (s, 2H), 2.51 (m, 2H); <sup>13</sup>C NMR (100 MHz, CDCl<sub>3</sub>) δ 149.8, 125.8, 51.3, 44.5, 13.4; IR (KBr): ν<sub>max</sub> 3427, 2981, 1718, 1401, 1144 cm<sup>-1</sup>; HRMS (ESI) calcd for C<sub>15</sub>H<sub>27</sub>N<sub>2</sub>O<sub>6</sub> [M+H]<sup>+</sup> requires 331.1869, found 331.1864.

**Table 2, entry 13.** Following the general procedure, the reaction of MBH alcohol **1j** (43 mg, 0.3 mmol), PPh<sub>3</sub> (157 mg, 0.6 mmol) and diethyl azodicarboxylate **2b** (94  $\mu$ L, 0.6 mmol) was performed for 21 minutes.

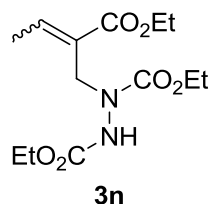

**3n**: obtained as an inseparable mixture of *E/Z* isomers (*E/Z* 13:1) in 75 mg, 83% yield, as colorless oil; NMR data for *E*-**3n**: <sup>1</sup>H NMR (400 MHz, CDCl<sub>3</sub>)  $\delta$  7.11 (q, *J* = 6.9 Hz, 1H), 6.70 (br m, 1H), 4.34 (s, 2H), 4.19 (m, 6H), 1.92 (m, 3H), 1.28 (m, 9H); <sup>13</sup>C NMR (100 MHz, CDCl<sub>3</sub>)  $\delta$  166.9, 155.8(2C), 143.5, 127.8, 62.4, 61.8, 60.6, 45.2, 14.43, 14.38, 14.3, 14.1; selected NMR data for *Z*-**3n**: <sup>1</sup>H NMR (400 MHz, CDCl<sub>3</sub>)  $\delta$  6.26 (br m, 1H), 2.05 (d, *J* = 7.2 Hz, 3H); <sup>13</sup>C NMR (100 MHz, CDCl<sub>3</sub>)  $\delta$  64.0, 60.4, 15.6; IR (KBr):  $\nu_{\max}$  3427, 2985, 1712, 1401, 1137 cm<sup>-1</sup>; HRMS (ESI) calcd for C<sub>13</sub>H<sub>23</sub>N<sub>2</sub>O<sub>6</sub> [M+H]<sup>+</sup> requires 303.1556, found 303.1555.

**Table 2, entry 14.** Following the general procedure, the reaction of MBH alcohol **1j** (43 mg, 0.3 mmol), PPh<sub>3</sub> (157 mg, 0.6 mmol) and di-*tert*-butyl azodicarboxylate **2c** (138 mg, 0.6 mmol) was performed for 40 minutes.

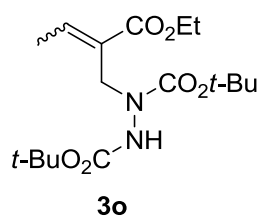

**3o**: obtained as an inseparable mixture of *E/Z* isomers (*E/Z* 5:1) in 59 mg, 55% yield, as colorless oil; NMR data for *E*-**3o**: <sup>1</sup>H NMR (400 MHz, CDCl<sub>3</sub>)  $\delta$  7.09 (q, *J* = 6.9 Hz, 1H), 6.24 (br m, 1H), 4.41 (s, 2H), 4.19 (q, *J* = 7.1 Hz, 2H), 1.90 (d, *J* = 6.9 Hz, 3H), 1.46 (m, 18H), 1.30 (t, *J* = 7.1 Hz, 3H); <sup>13</sup>C NMR (100 MHz, CDCl<sub>3</sub>)  $\delta$  166.9, 155.0(2C), 143.1, 128.3, 80.8(2C), 60.5, 44.2, 28.1(2C), 14.2, 14.1; selected NMR data for *Z*-**3o**: <sup>1</sup>H NMR (400 MHz, CDCl<sub>3</sub>)  $\delta$  6.07 (br s, 1H), 2.04 (d, *J* = 7.2 Hz, 3H), 1.14 (t, *J* = 7.2 Hz, 3H); <sup>13</sup>C NMR (100 MHz, CDCl<sub>3</sub>)  $\delta$  142.6, 128.1, 60.2, 29.6, 15.6;



IR (KBr):  $\nu_{\max}$  3432, 2980, 1711, 1400, 1152  $\text{cm}^{-1}$ ; HRMS (ESI) calcd for  $\text{C}_{17}\text{H}_{31}\text{N}_2\text{O}_6$   $[\text{M}+\text{H}]^+$  requires 359.2182, found 359.2177.

**Table 2, entry 15.** Following the general procedure, the reaction of MBH alcohol **1k** (39 mg, 0.3 mmol),  $\text{PPh}_3$  (157 mg, 0.6 mmol) and diethyl azodicarboxylate **2b** (94  $\mu\text{L}$ , 0.6 mmol) was performed for 10 minutes.

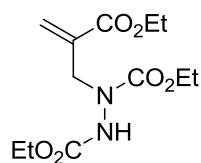

**3p**

**3p:** 78 mg, 90% yield, as colorless oil;  $^1\text{H}$  NMR (400 MHz,  $\text{CDCl}_3$ )  $\delta$  7.12 (br m, 1H), 6.33 (s, 1H), 5.78 (s, 1H), 4.37 (s, 2H), 4.20 (m, 6H), 1.28 (m, 9H);  $^{13}\text{C}$  NMR (100 MHz,  $\text{CDCl}_3$ )  $\delta$  165.9, 156.0(2C), 135.3, 128.0, 62.4, 61.8, 60.8, 51.3, 14.28, 14.24, 13.9; IR (KBr):  $\nu_{\max}$  3417, 2983, 1718, 1401, 1138  $\text{cm}^{-1}$ ; HRMS (ESI) calcd for  $\text{C}_{12}\text{H}_{21}\text{N}_2\text{O}_6$   $[\text{M}+\text{H}]^+$  requires 289.1400, found 289.1398.

**Table 2, entry 16.** Following the general procedure, the reaction of MBH alcohol **1k** (39 mg, 0.3 mmol),  $\text{PPh}_3$  (157 mg, 0.6 mmol) and diisopropyl azodicarboxylate **2a** (118  $\mu\text{L}$ , 0.6 mmol) was performed for 20 minutes.

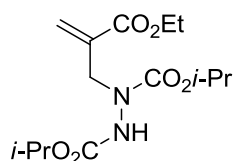

**3q**

**3q:** 84 mg, 89% yield, as colorless oil;  $^1\text{H}$  NMR (400 MHz,  $\text{CDCl}_3$ )  $\delta$  7.10 (br m, 1H), 6.24 (s, 1H), 5.69 (s, 1H), 4.86 (m, 2H), 4.27 (s, 2H), 4.13 (q,  $J = 7.1$  Hz, 2H), 1.22 (t,  $J = 7.1$  Hz, 3H), 1.16 (d,  $J = 6.3$  Hz, 12H);  $^{13}\text{C}$  NMR (100 MHz,  $\text{CDCl}_3$ )  $\delta$  165.8, 155.6(2C), 135.4, 127.6, 69.8, 69.3, 60.6, 50.9, 21.73, 21.67, 13.9; IR (KBr):  $\nu_{\max}$  3448, 2983, 1718, 1401, 1108  $\text{cm}^{-1}$ ; HRMS (ESI) calcd for  $\text{C}_{14}\text{H}_{25}\text{N}_2\text{O}_6$   $[\text{M}+\text{H}]^+$  requires 317.1713, found 317.1713.

**Table 2, entry 17.** Following the general procedure, the reaction of MBH alcohol **1k** (39 mg, 0.3 mmol), PPh<sub>3</sub> (157 mg, 0.6 mmol) and di-*tert*-butyl azodicarboxylate **2c** (138 mg, 0.6 mmol) was performed for 25 minutes.

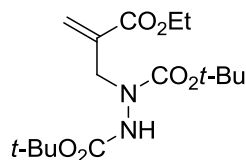

**3r**

**3r**: 93 mg, 90% yield, as colorless oil; <sup>1</sup>H NMR (400 MHz, CDCl<sub>3</sub>) δ 6.50 (br m, 1H), 6.31 (s, 1H), 5.73 (s, 1H), 4.32 (s, 2H), 4.22 (q, *J* = 7.1 Hz, 2H), 1.47 (s, 18H), 1.30 (t, *J* = 7.1 Hz, 3H); <sup>13</sup>C NMR (100 MHz, CDCl<sub>3</sub>) δ 166.0, 155.0(2C), 135.9, 127.3, 81.2(2C), 60.7, 50.9, 28.1(2C), 14.1; IR (KBr): ν<sub>max</sub> 3344, 2981, 1713, 1400, 1152 cm<sup>-1</sup>; HRMS (ESI) calcd for C<sub>16</sub>H<sub>28</sub>N<sub>2</sub>NaO<sub>6</sub> [M+Na]<sup>+</sup> requires 367.1845, found 367.1840.

**Table 2, entry 18.** Following the general procedure, the reaction of MBH alcohol **1l** (35 mg, 0.3 mmol), PPh<sub>3</sub> (157 mg, 0.6 mmol) and diethyl azodicarboxylate **2b** (94 μL, 0.6 mmol) was performed for 13 minutes.

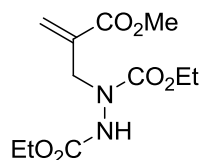

**3s**

**3s**: 72 mg, 87% yield, as slightly yellow oil; <sup>1</sup>H NMR (400 MHz, CDCl<sub>3</sub>) δ 6.84 (br m, 1H), 6.34 (s, 1H), 5.79 (m, 1H), 4.37 (s, 2H), 4.19 (m, 4H), 3.77 (s, 3H), 1.27 (m, 6H); <sup>13</sup>C NMR (100 MHz, CDCl<sub>3</sub>) δ 166.4, 156.1(2C), 135.1, 128.6, 62.6, 61.9, 51.9, 51.6, 14.4, 14.3; IR (KBr): ν<sub>max</sub> 3449, 2981, 1719, 1401, 1139 cm<sup>-1</sup>; HRMS (ESI) calcd for C<sub>11</sub>H<sub>19</sub>N<sub>2</sub>O<sub>6</sub> [M+H]<sup>+</sup> requires 275.1243, found 275.1243..

## 2. Analytical data for 1*H*-pyrazole **7** and mechanistic rationale

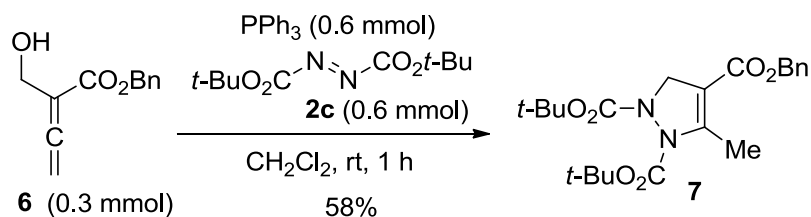

**7**: <sup>1</sup>H NMR (400 MHz, CDCl<sub>3</sub>) δ 7.36 (m, 5H), 5.20 (s, 2H), 4.49 (s, 2H), 2.59 (s, 3H), 1.51 (s, 9H), 1.49 (s, 9H); <sup>13</sup>C NMR (100 MHz, CDCl<sub>3</sub>) δ 163.7, 156.4, 151.5, 151.2, 136.0, 128.6, 128.2, 128.1, 107.4, 83.2, 82.4, 65.9, 52.4, 28.1, 28.0, 14.6; IR (KBr): ν<sub>max</sub> 2981, 1716, 1637, 1401, 1144 cm<sup>-1</sup>; HRMS (ESI) calcd for C<sub>22</sub>H<sub>30</sub>N<sub>2</sub>NaO<sub>6</sub> [M+Na]<sup>+</sup> requires 441.2002, found 441.2005.

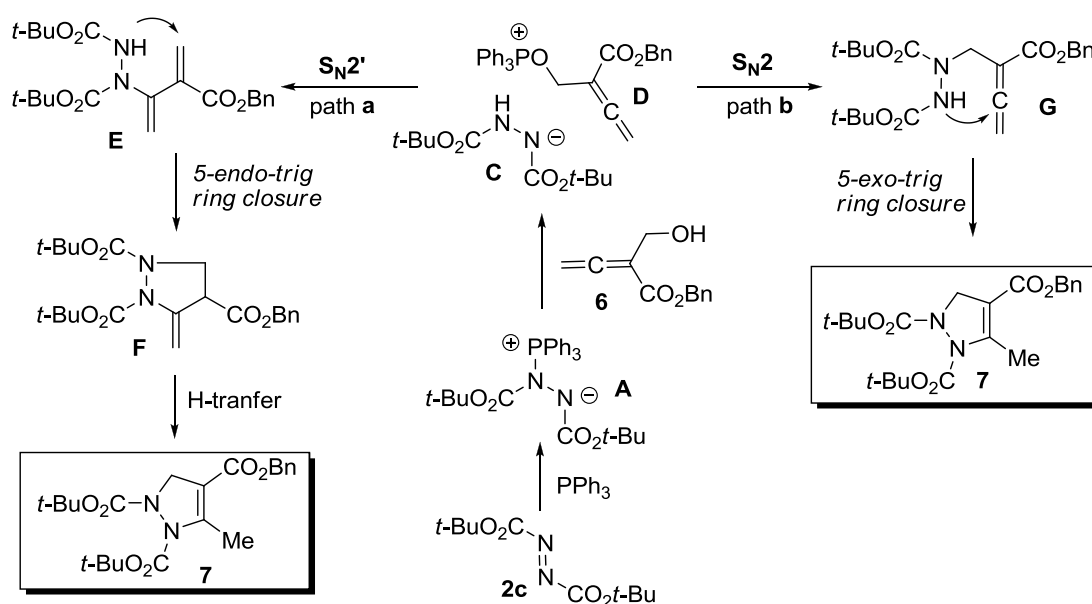

**Scheme S1**: Plausible mechanism for the formation of compound **7**.

The formation of compound **7** from the reaction between azodicarboxylate **2c**, allenic MBH alcohol **6**, and PPh<sub>3</sub> can be tentatively rationalized in Scheme S1. Initially, addition of PPh<sub>3</sub> to **2c** forms the Huisgen zwitterion **A**, which deprotonates the OH of **6** followed by the migration of the phosphonium to produce the anionic species **C** and the oxophosphonium intermediate **D**. In one of the possible pathways (**path a**), S<sub>N</sub>2' attack of intermediate **C** on **D** brings about the hydrazine **E**, which undergoes a 5-*endo-trig* cyclization to furnish **F**. A final 1,3-proton transfer of **F** results in the

formation of 1*H*-pyrazole **7**. Another possible pathway for the formation of **7** (path **b**) involves the S<sub>N</sub>2 displacement of **D** with the species **C** generating the allenic hydrazine **G**, which undertakes a favorable 5-*exo-trig* ring closure to furnish the 1*H*-pyrazole **7**.

### 3. Copies of $^1\text{H}$ , $^{13}\text{C}$ , DEPT, and NOESY NMR spectra

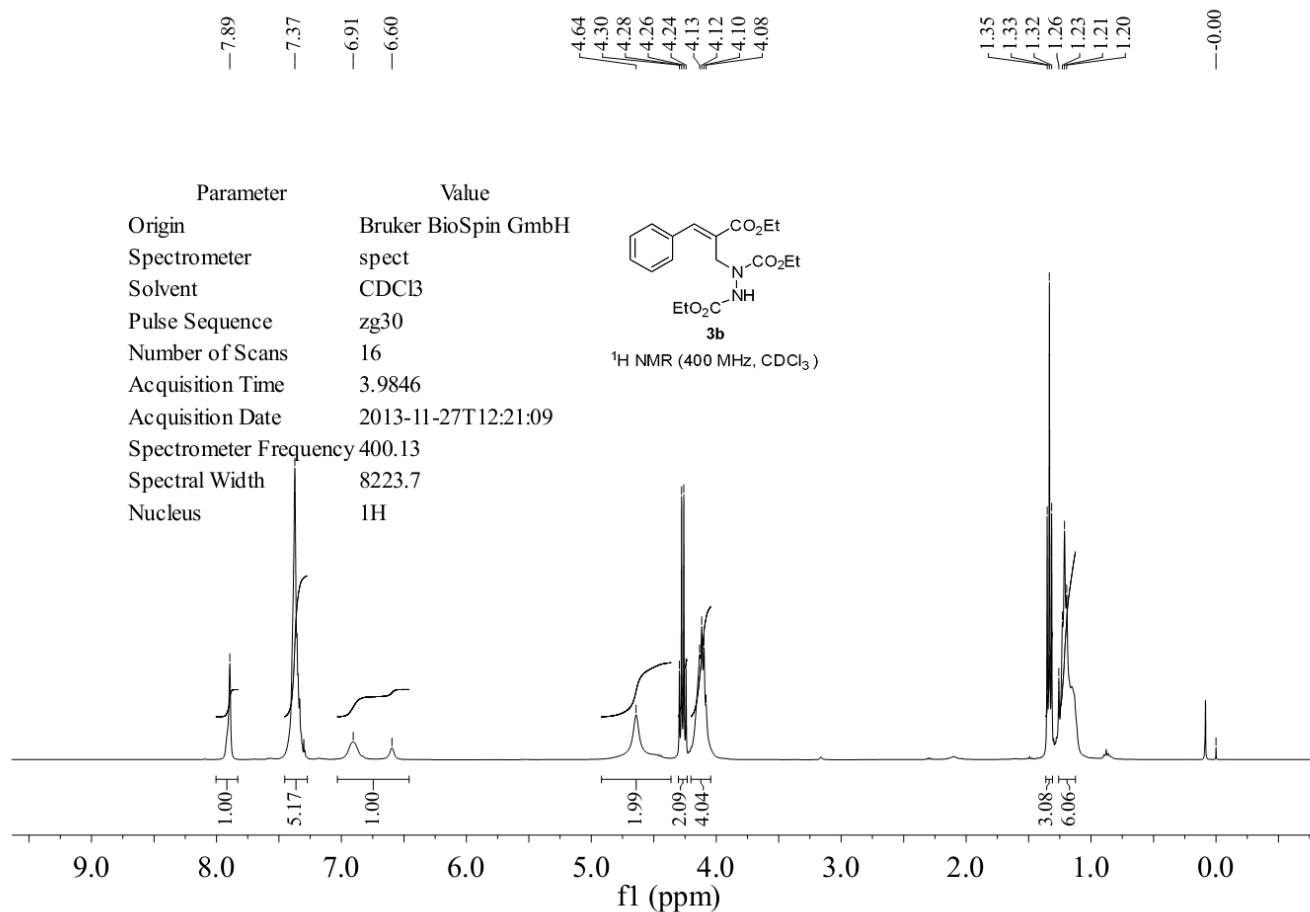

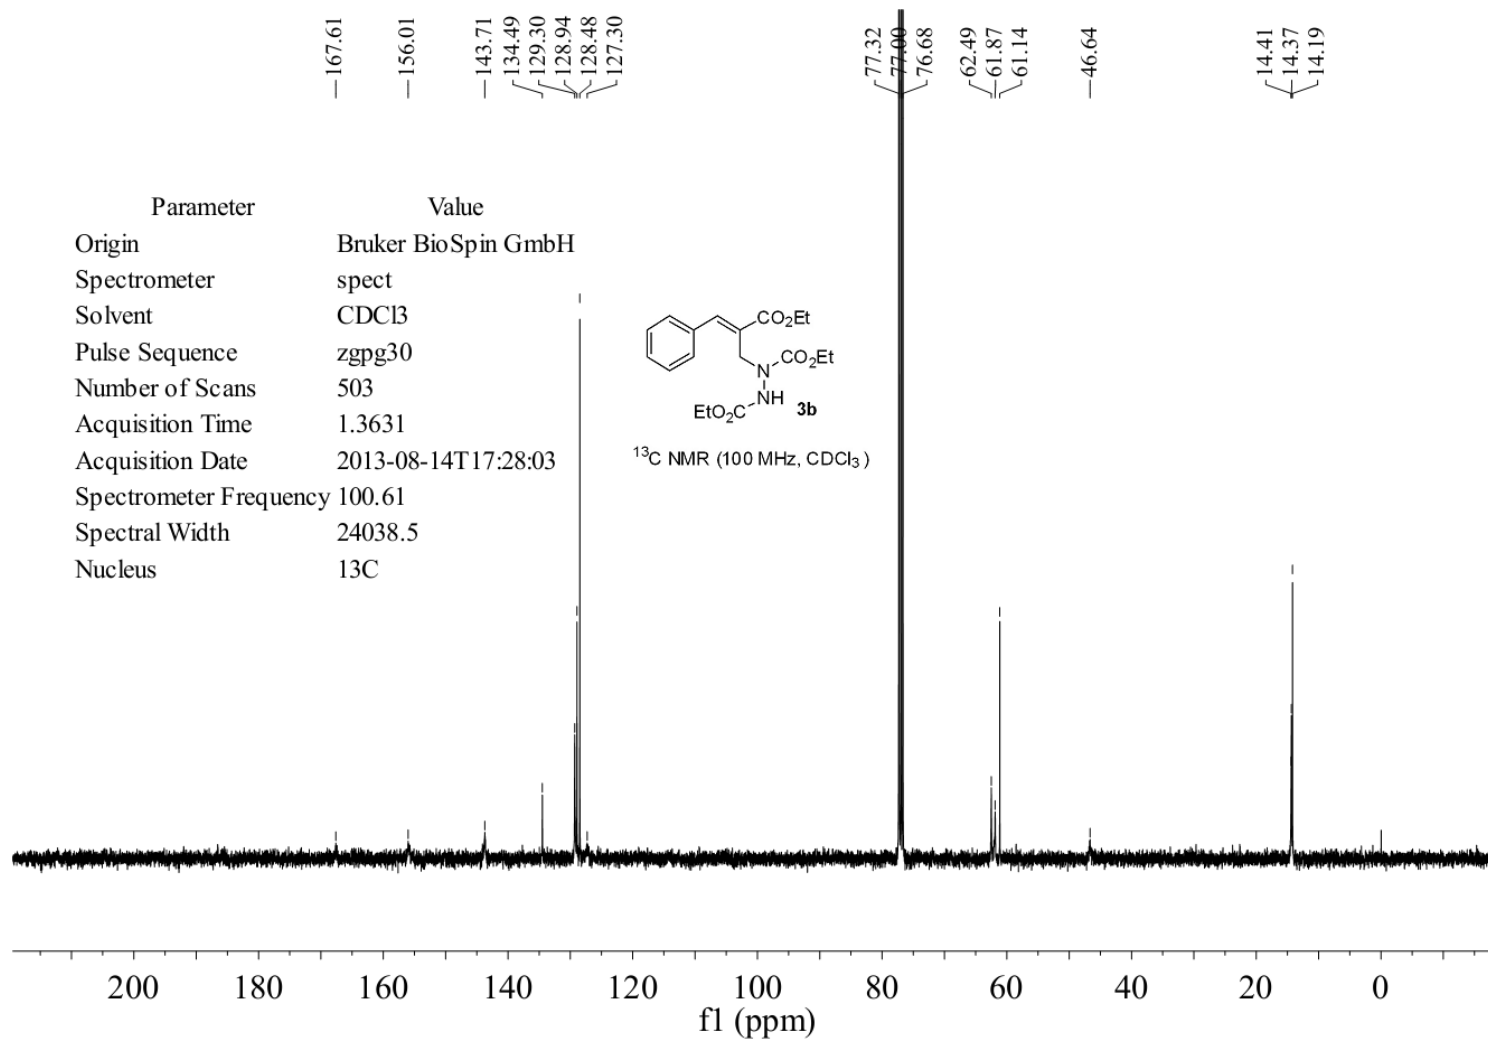

| Parameter              | Value               |
|------------------------|---------------------|
| Origin                 | Bruker BioSpin GmbH |
| Spectrometer           | spect               |
| Solvent                | CDCl <sub>3</sub>   |
| Pulse Sequence         | zgpg30              |
| Number of Scans        | 503                 |
| Acquisition Time       | 1.3631              |
| Acquisition Date       | 2013-08-14T17:28:03 |
| Spectrometer Frequency | 100.61              |
| Spectral Width         | 24038.5             |
| Nucleus                | 13C                 |

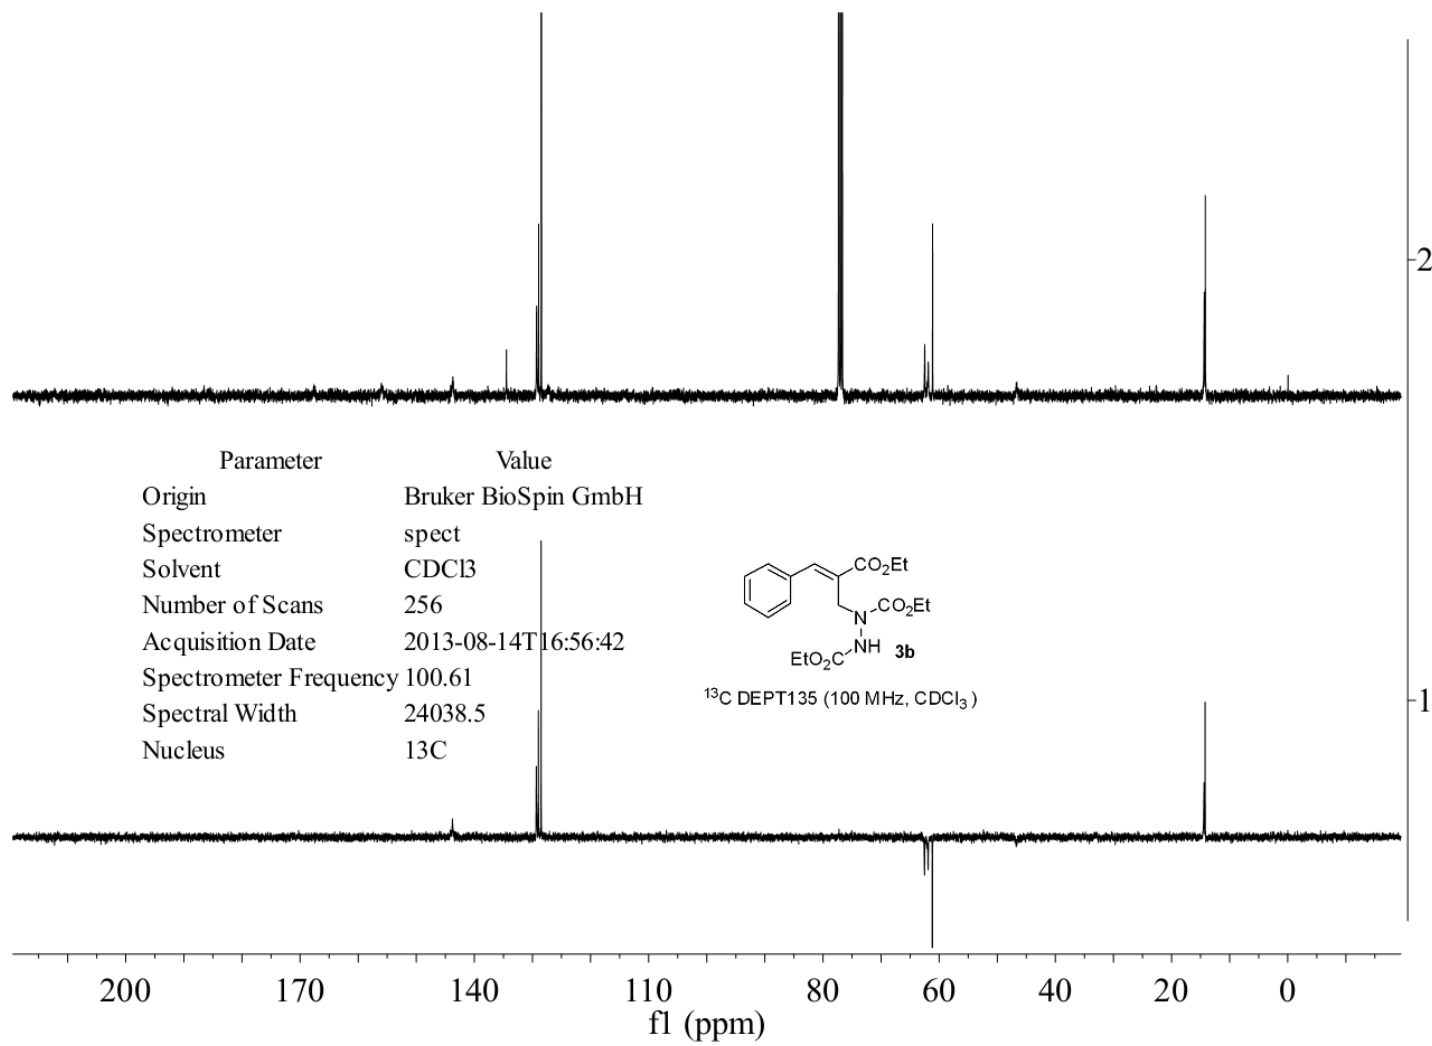

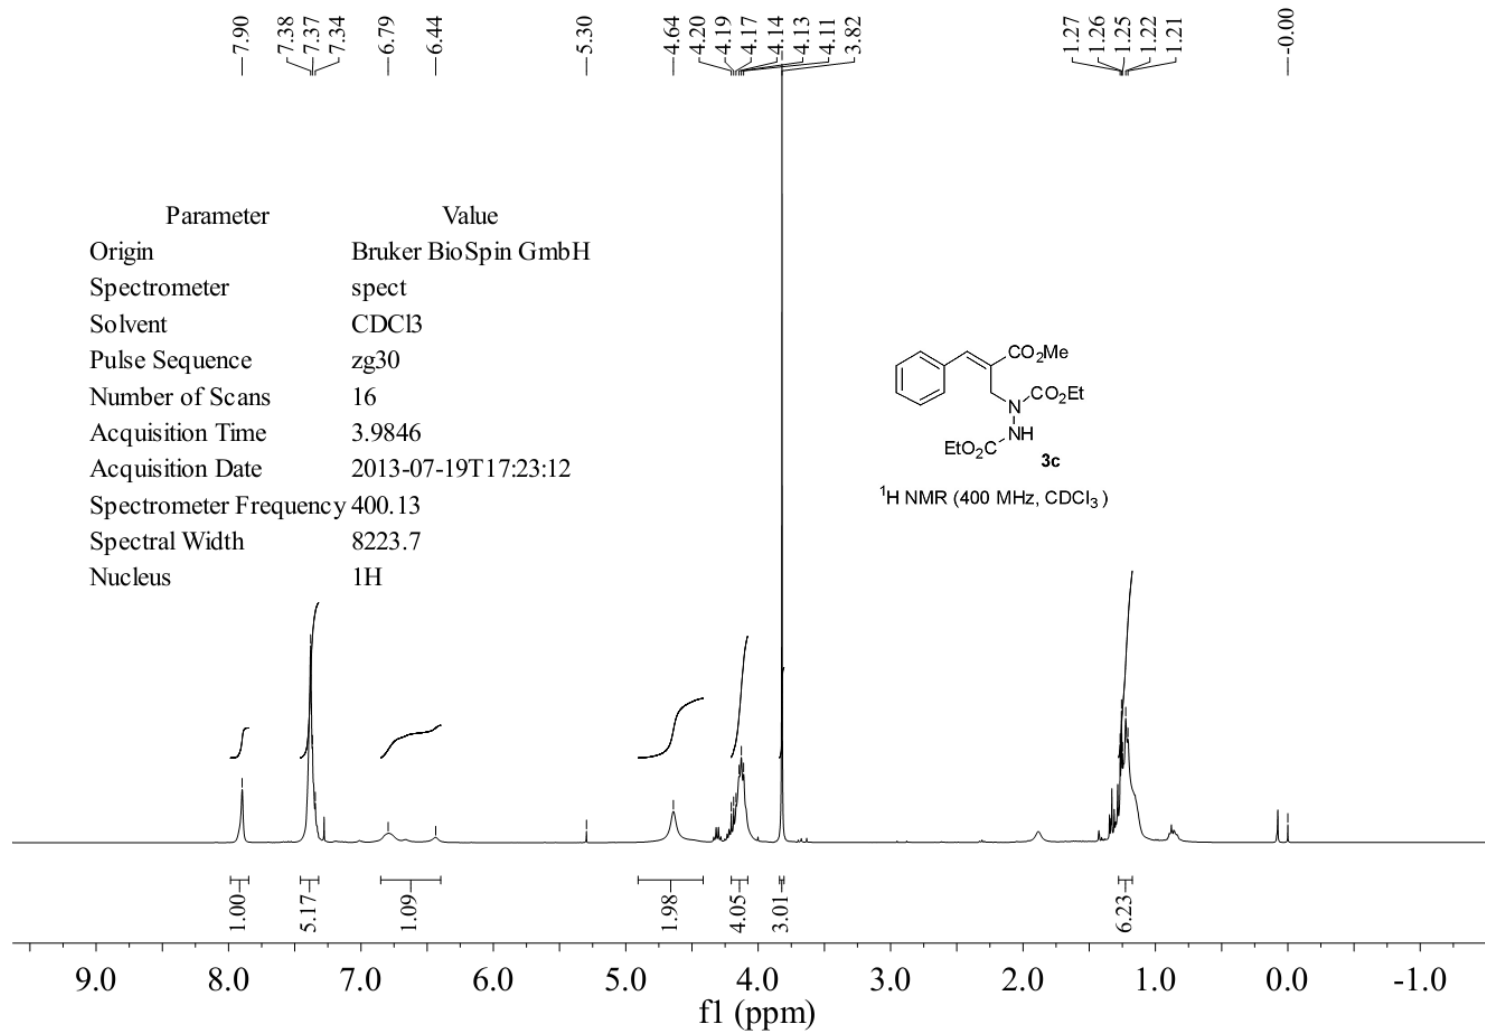



— 167.95  
 — 155.92  
 — 143.89  
 { 134.32  
 { 129.22  
 { 128.90  
 { 128.39  
 { 127.04  
  
 { 77.32  
 { 77.00  
 { 76.68  
  
 { 62.38  
 { 61.73  
 — 52.07  
 — 46.50  
  
 — 14.27

| Parameter              | Value               |
|------------------------|---------------------|
| Origin                 | Bruker BioSpin GmbH |
| Spectrometer           | spect               |
| Solvent                | CDCl <sub>3</sub>   |
| Pulse Sequence         | zgpg30              |
| Number of Scans        | 677                 |
| Acquisition Time       | 1.3631              |
| Acquisition Date       | 2013-09-01T16:02:08 |
| Spectrometer Frequency | 100.61              |
| Spectral Width         | 24038.5             |
| Nucleus                | <sup>13</sup> C     |

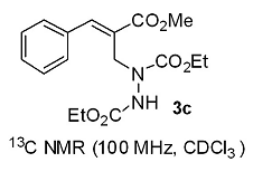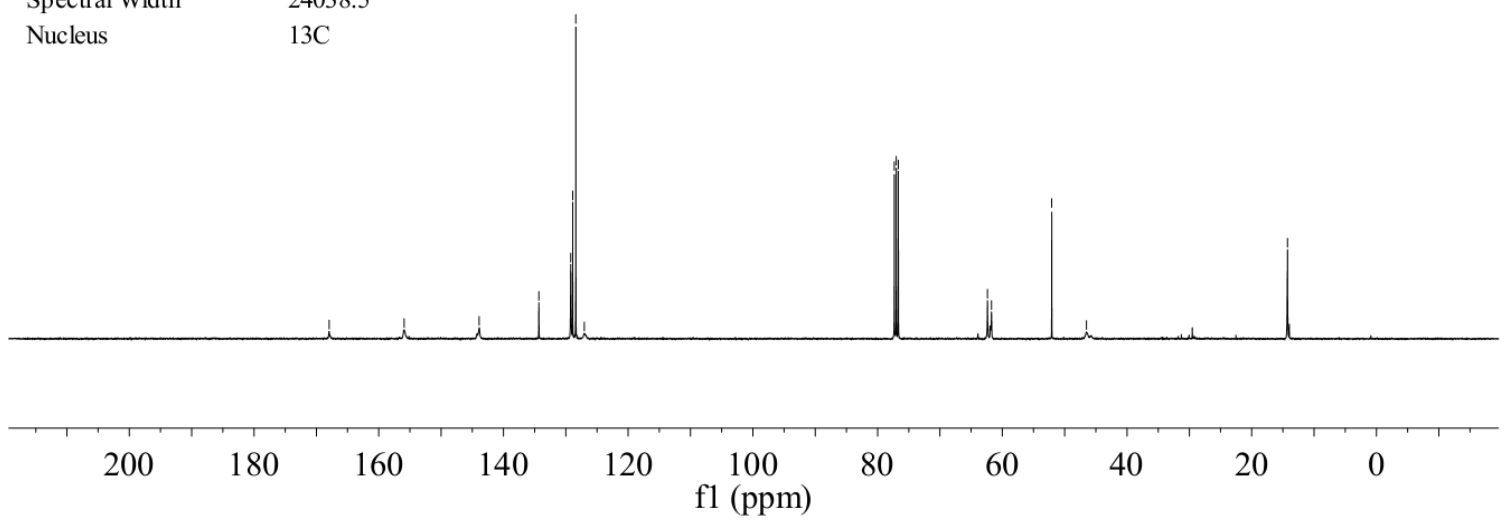

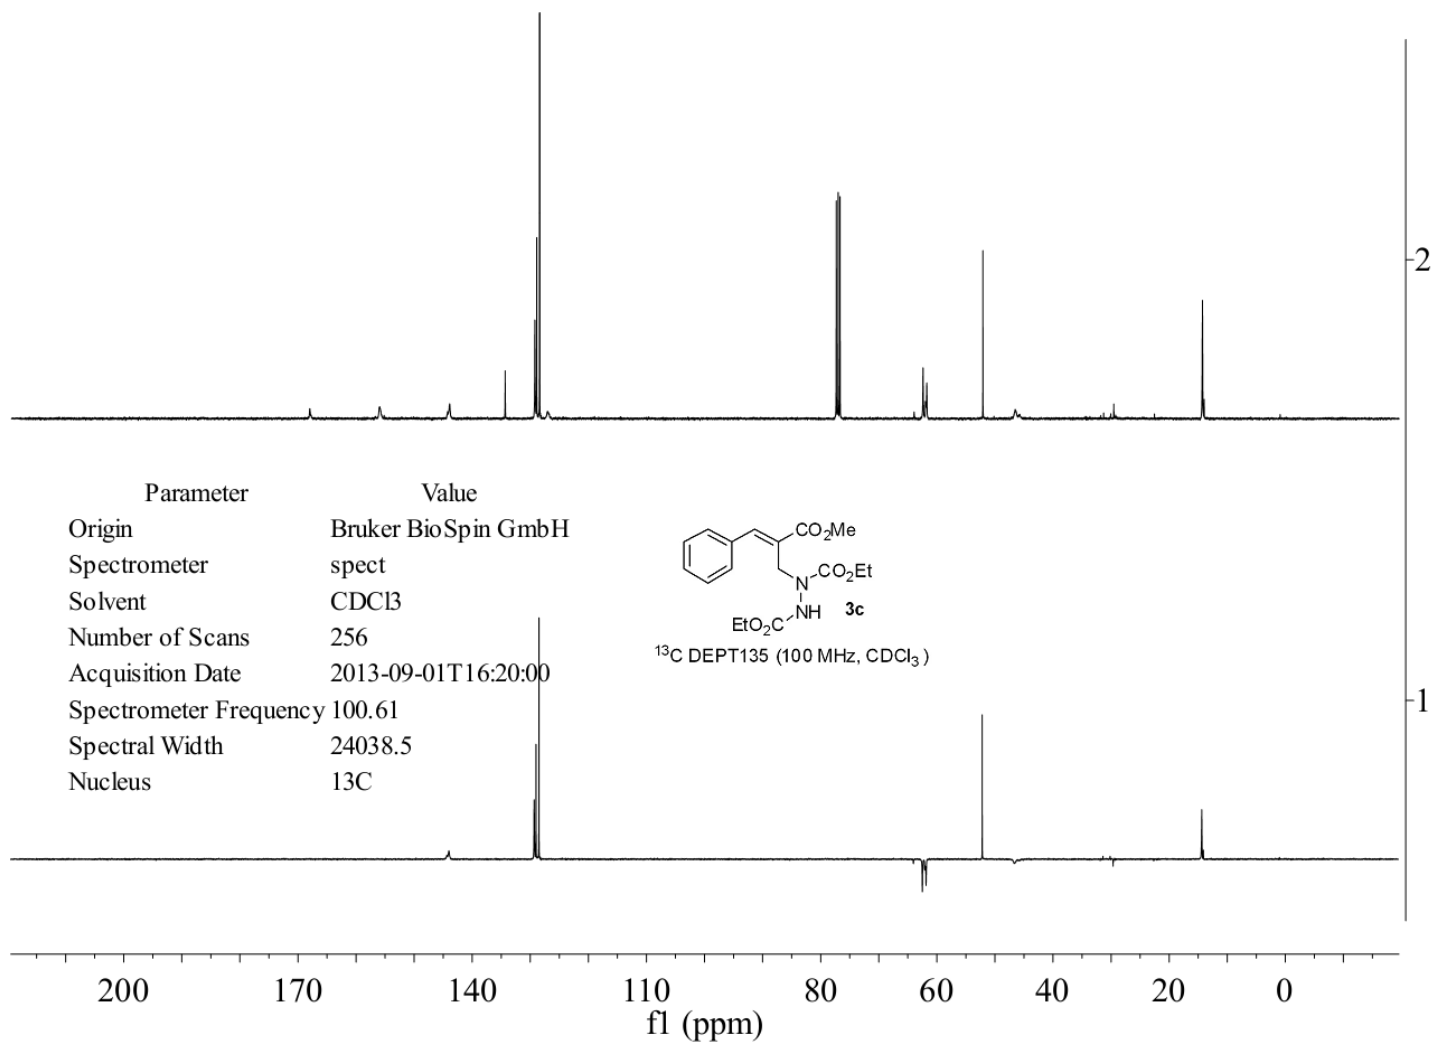

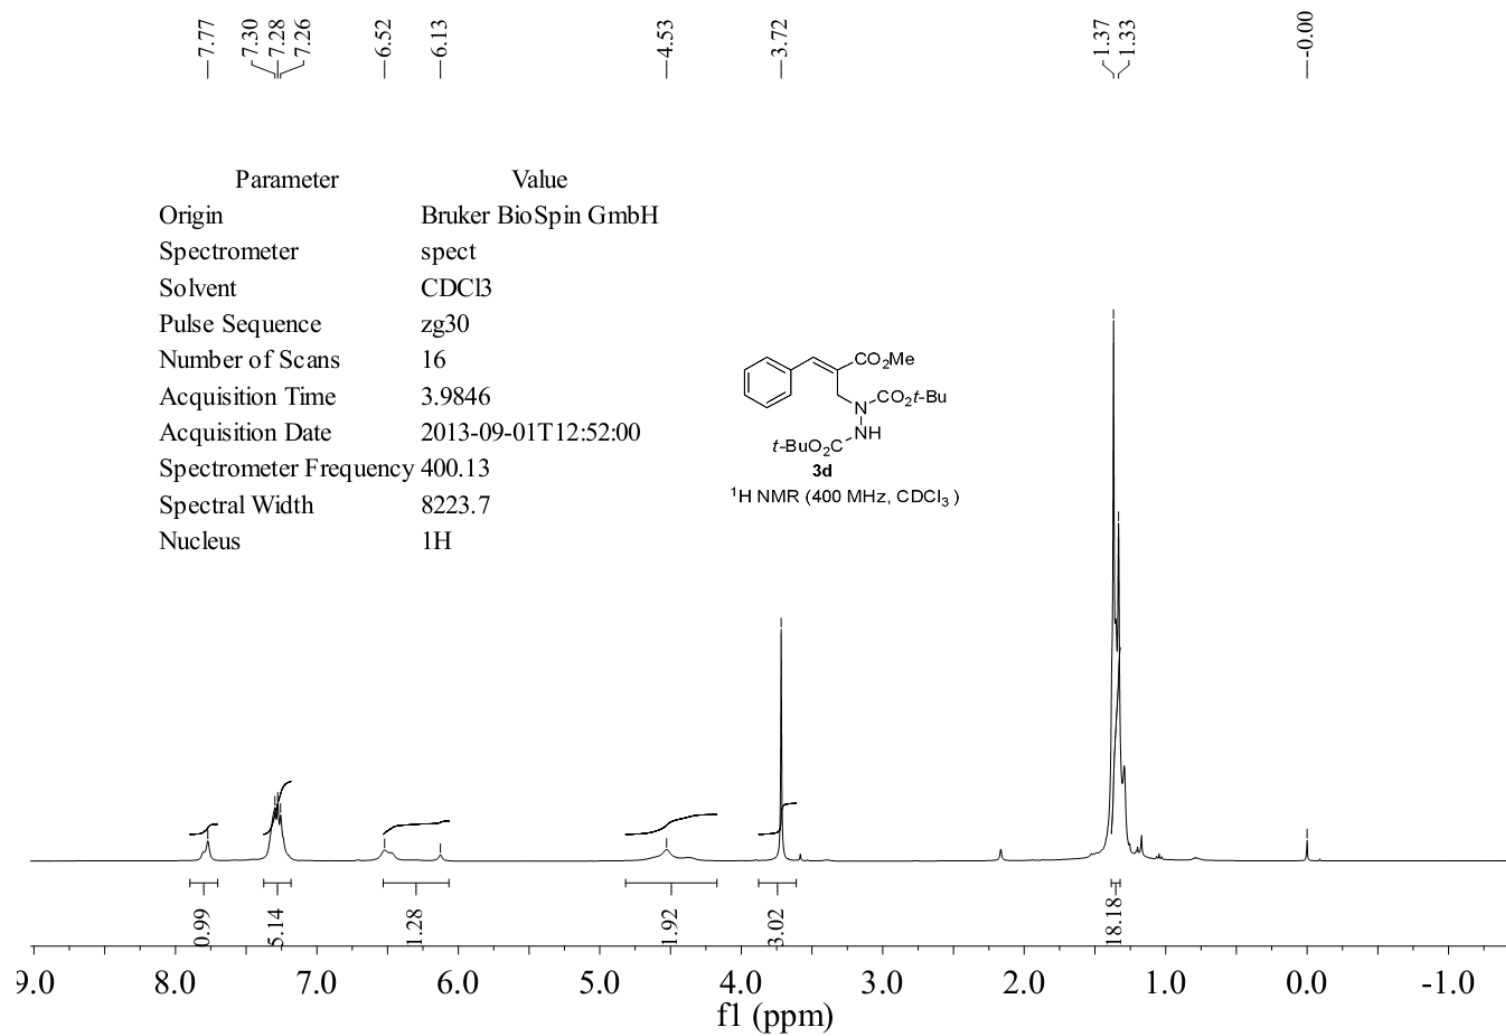

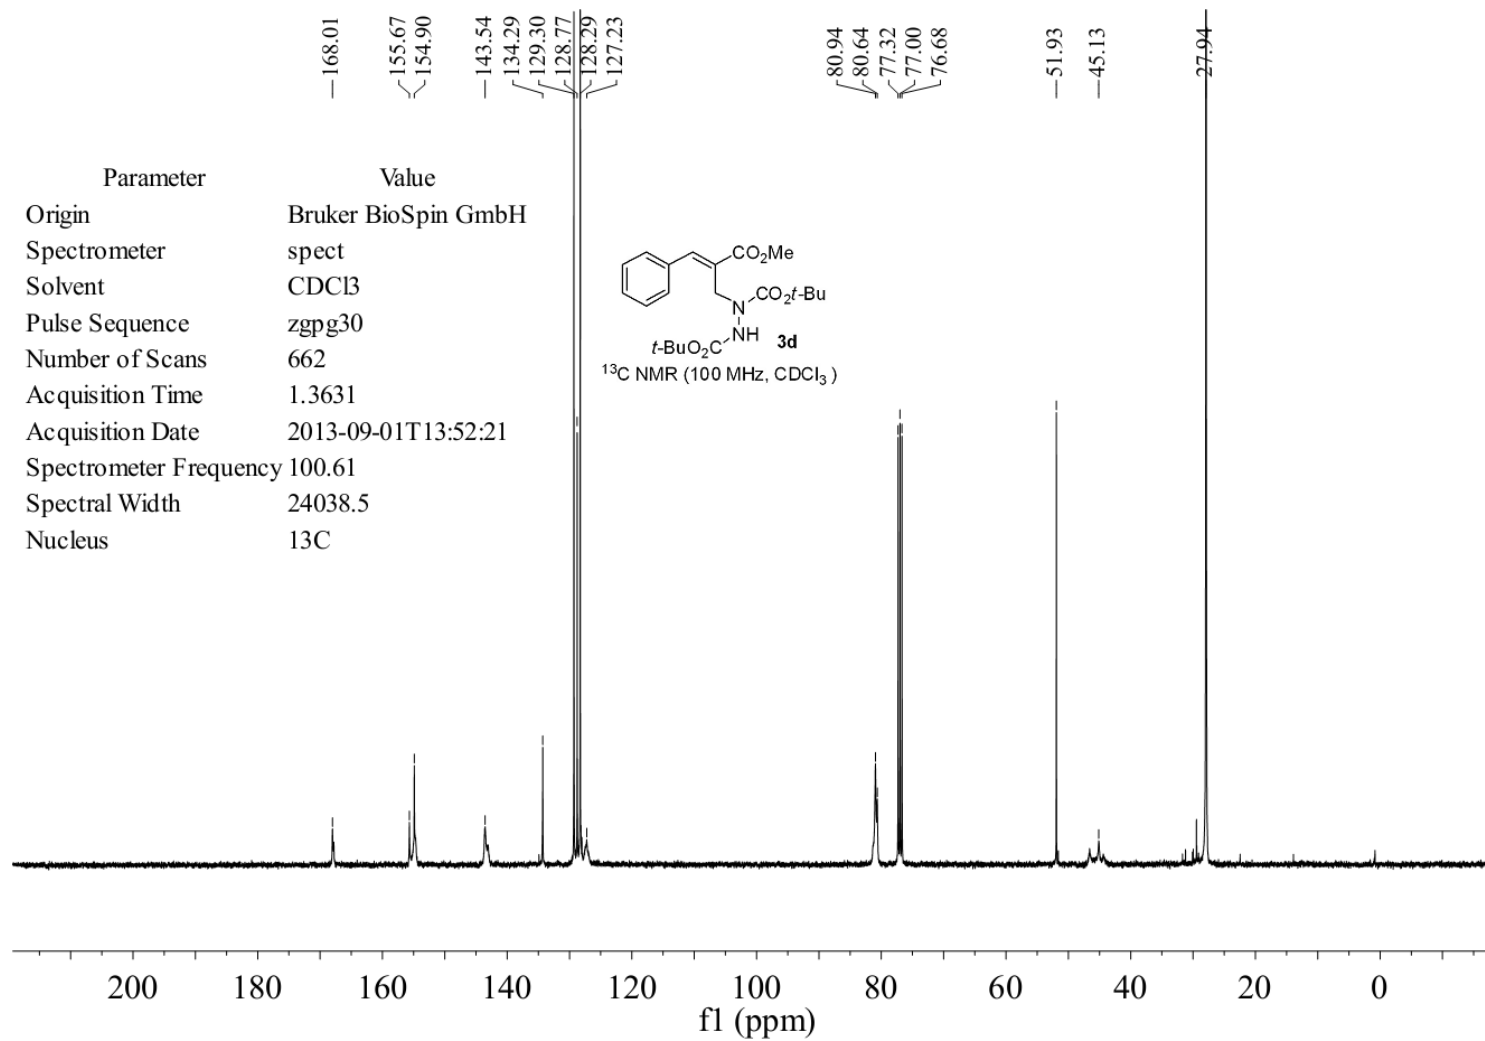

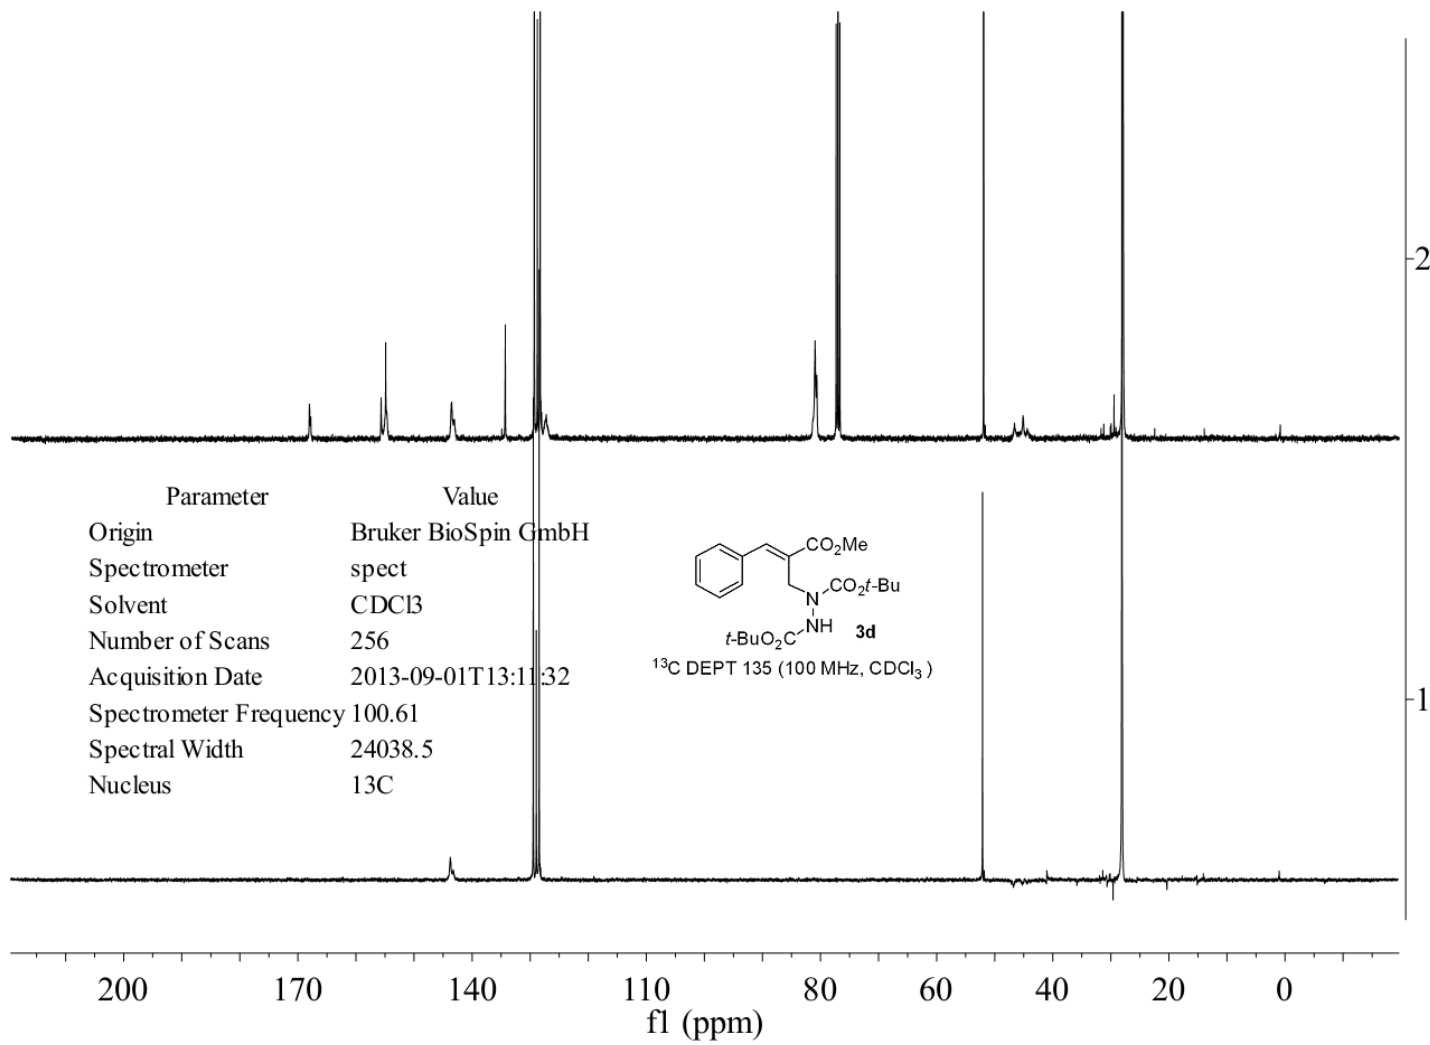

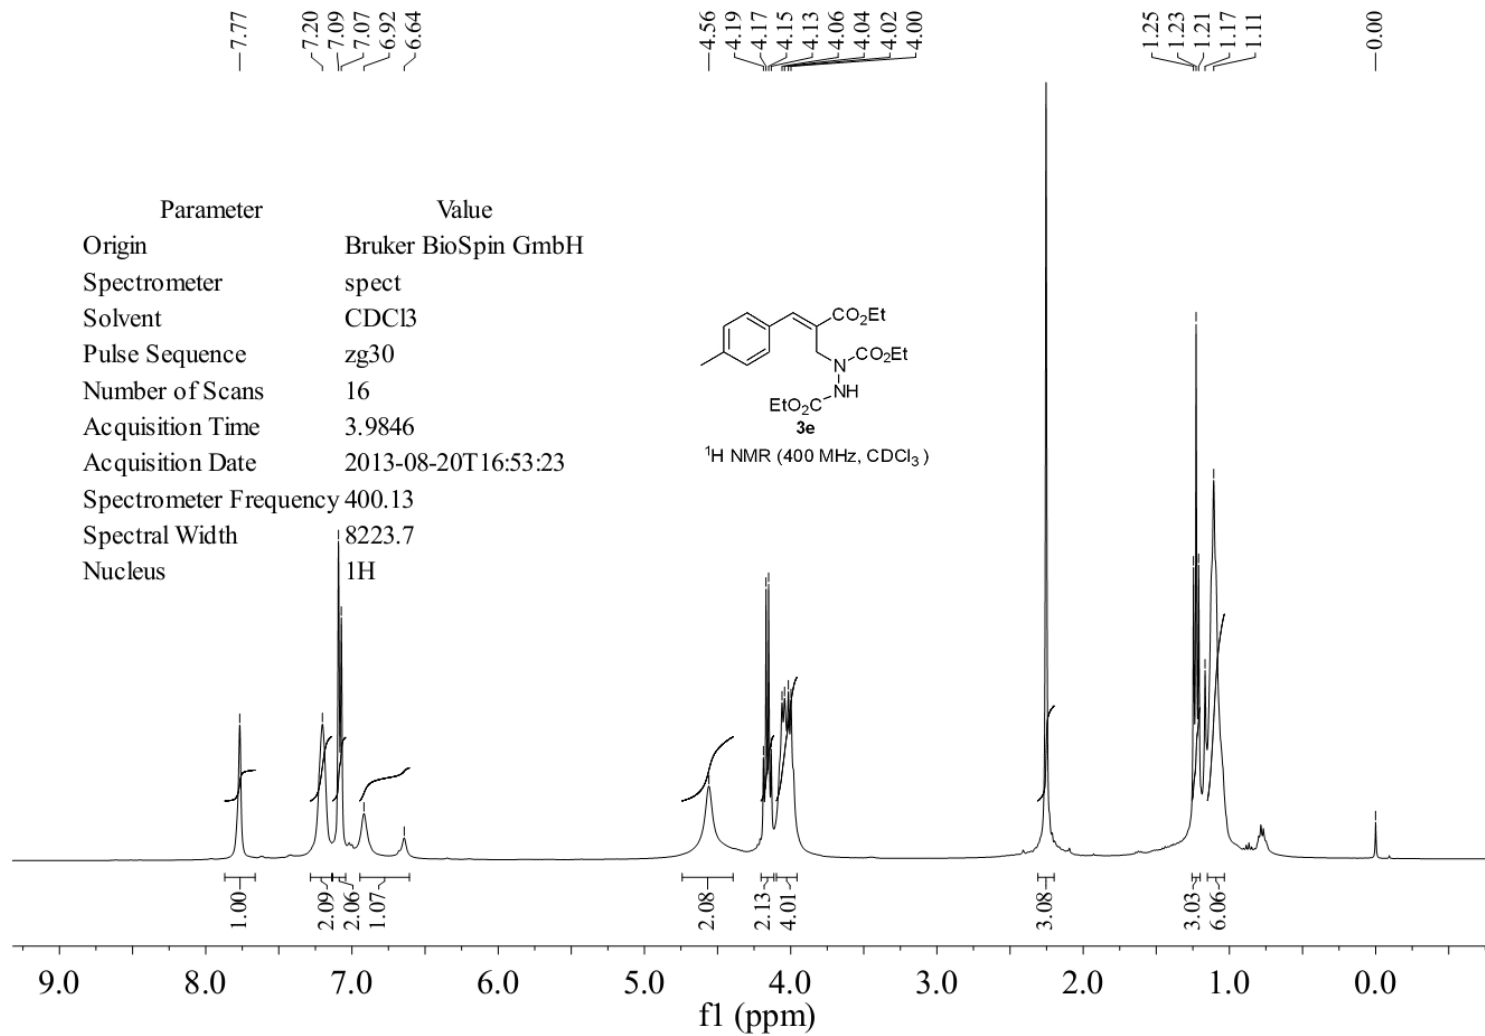

— 167.54  
 — 155.82  
 / 143.66  
 / 138.91  
 / 131.39  
 / 129.27  
 / 128.95  
 / 126.14  
  
 / 77.32  
 / 77.00  
 / 76.68  
 / 62.14  
 / 61.46  
 / 60.76  
 — 46.04  
  
 / 21.02  
 / 14.17  
 / 14.11  
 / 13.92

| Parameter              | Value               |
|------------------------|---------------------|
| Origin                 | Bruker BioSpin GmbH |
| Spectrometer           | spect               |
| Solvent                | CDCl <sub>3</sub>   |
| Pulse Sequence         | zgpg30              |
| Number of Scans        | 532                 |
| Acquisition Time       | 1.3631              |
| Acquisition Date       | 2013-08-20T17:27:26 |
| Spectrometer Frequency | 100.61              |
| Spectral Width         | 24038.5             |
| Nucleus                | <sup>13</sup> C     |

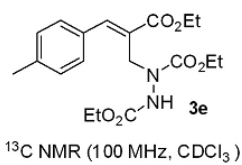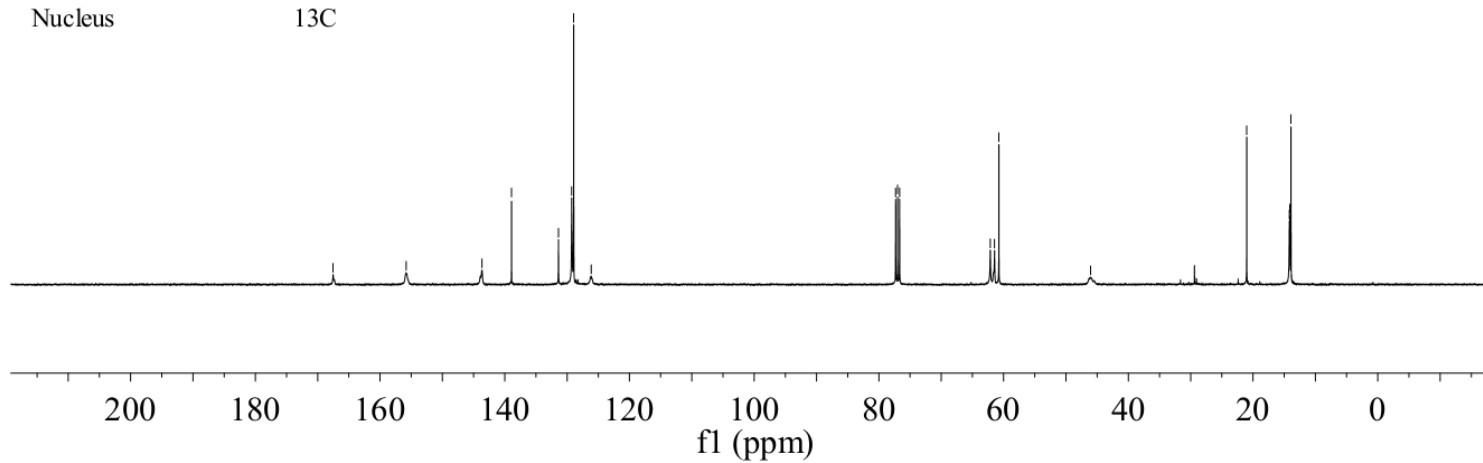

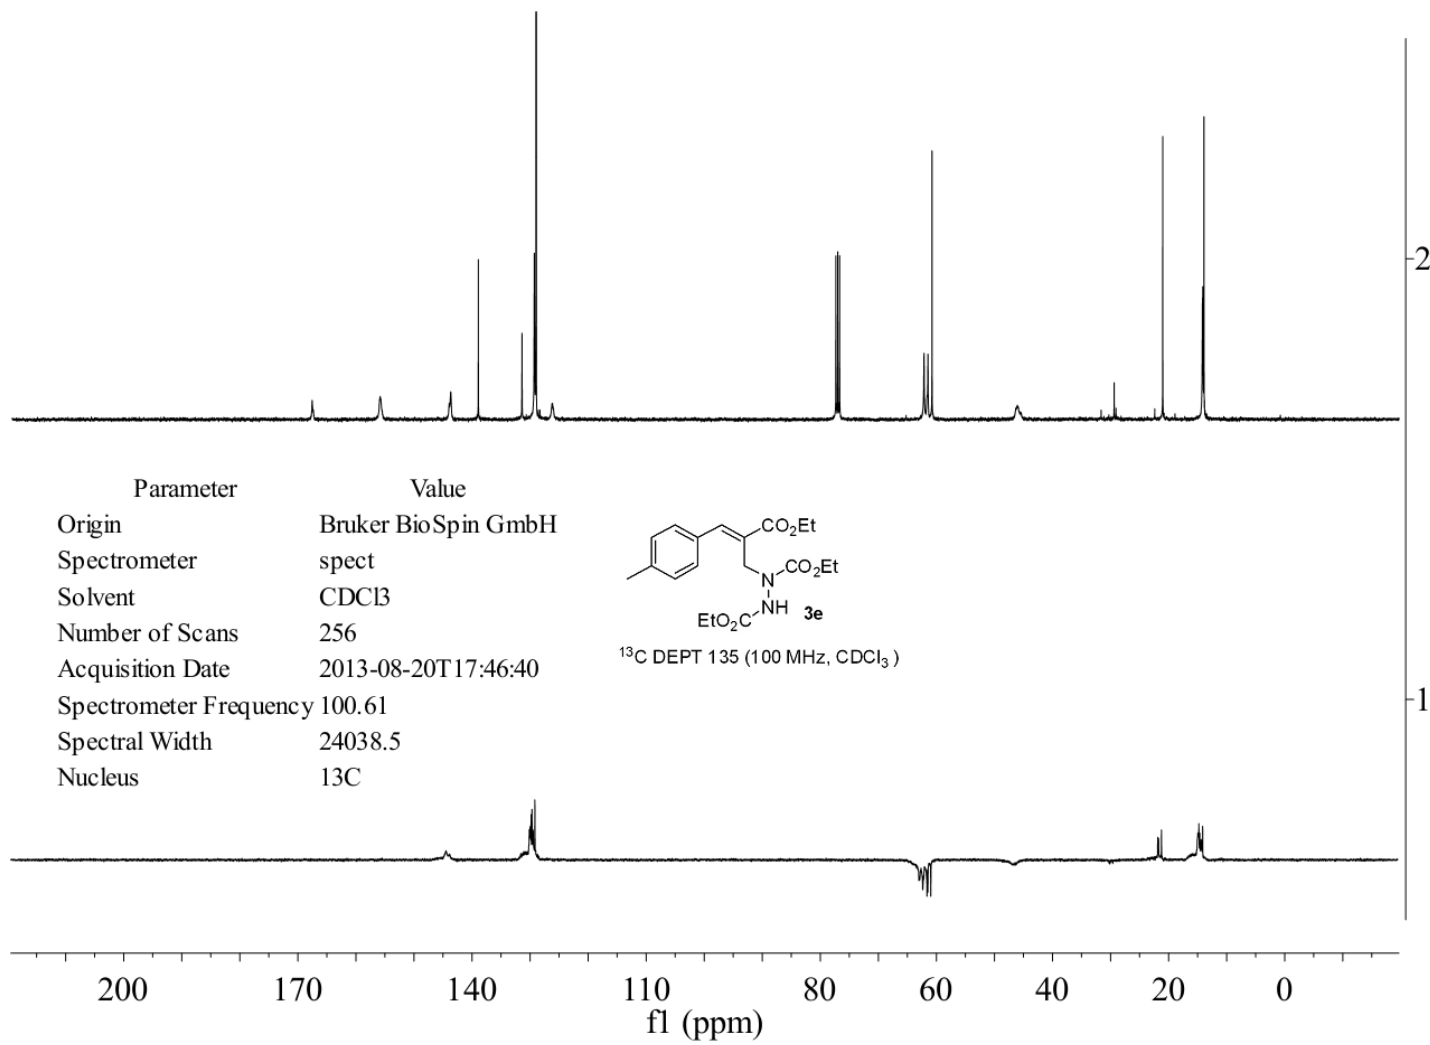



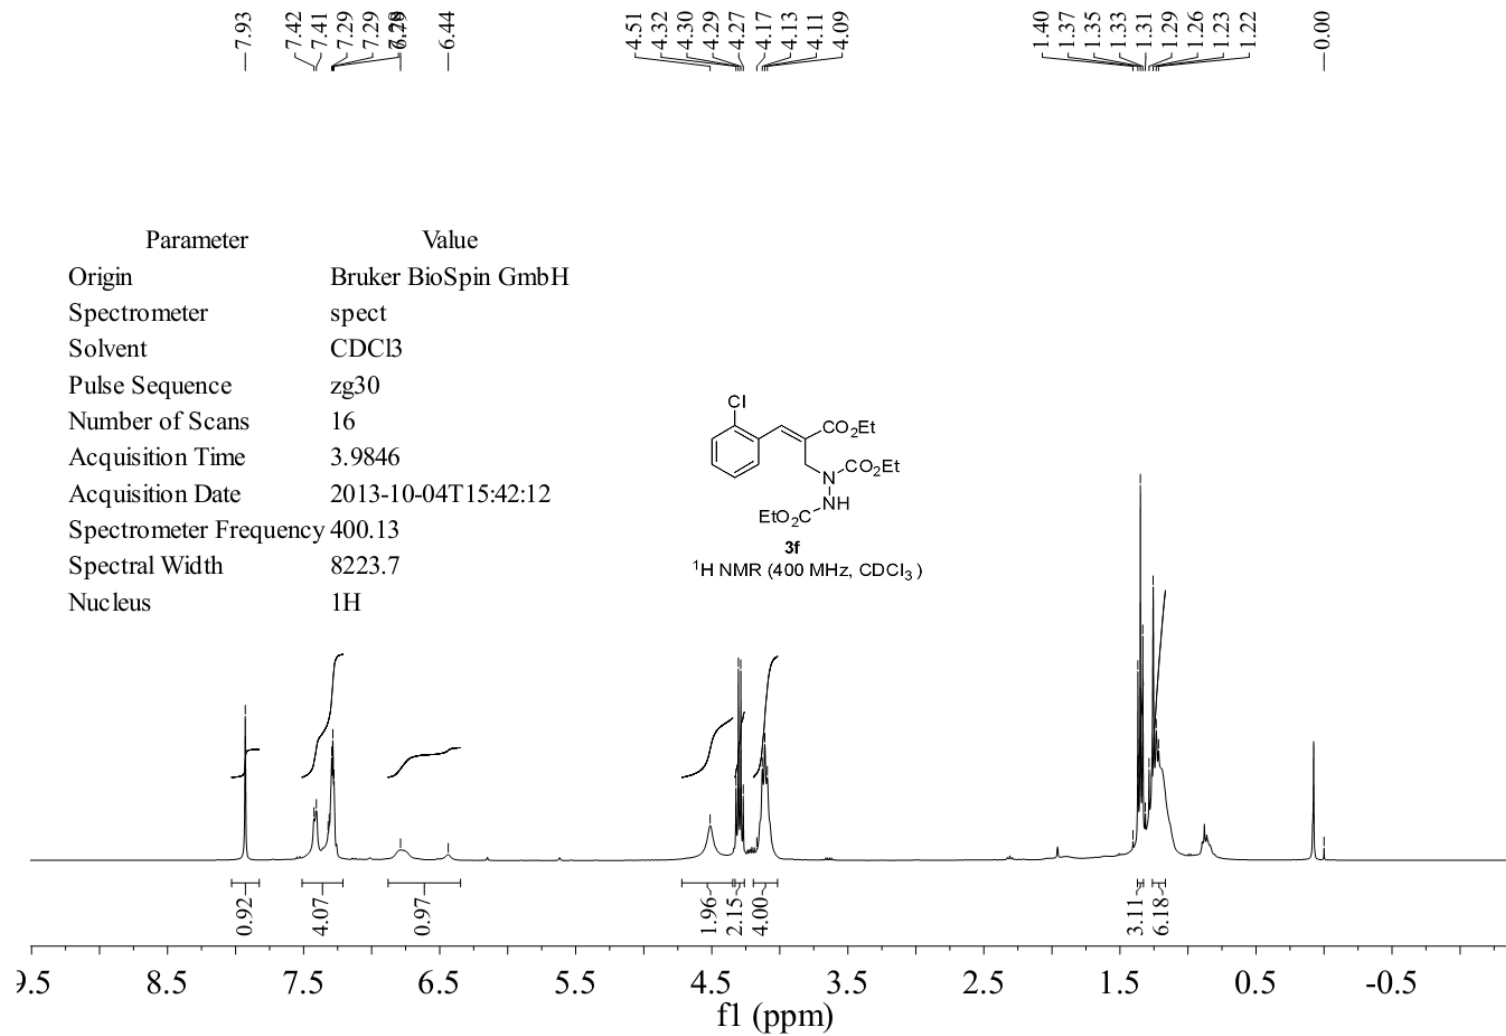

| Parameter              | Value               |
|------------------------|---------------------|
| Origin                 | Bruker BioSpin GmbH |
| Spectrometer           | spect               |
| Solvent                | CDCl <sub>3</sub>   |
| Pulse Sequence         | zg30                |
| Number of Scans        | 16                  |
| Acquisition Time       | 3.9846              |
| Acquisition Date       | 2013-10-04T15:42:12 |
| Spectrometer Frequency | 400.13              |
| Spectral Width         | 8223.7              |
| Nucleus                | <sup>1</sup> H      |

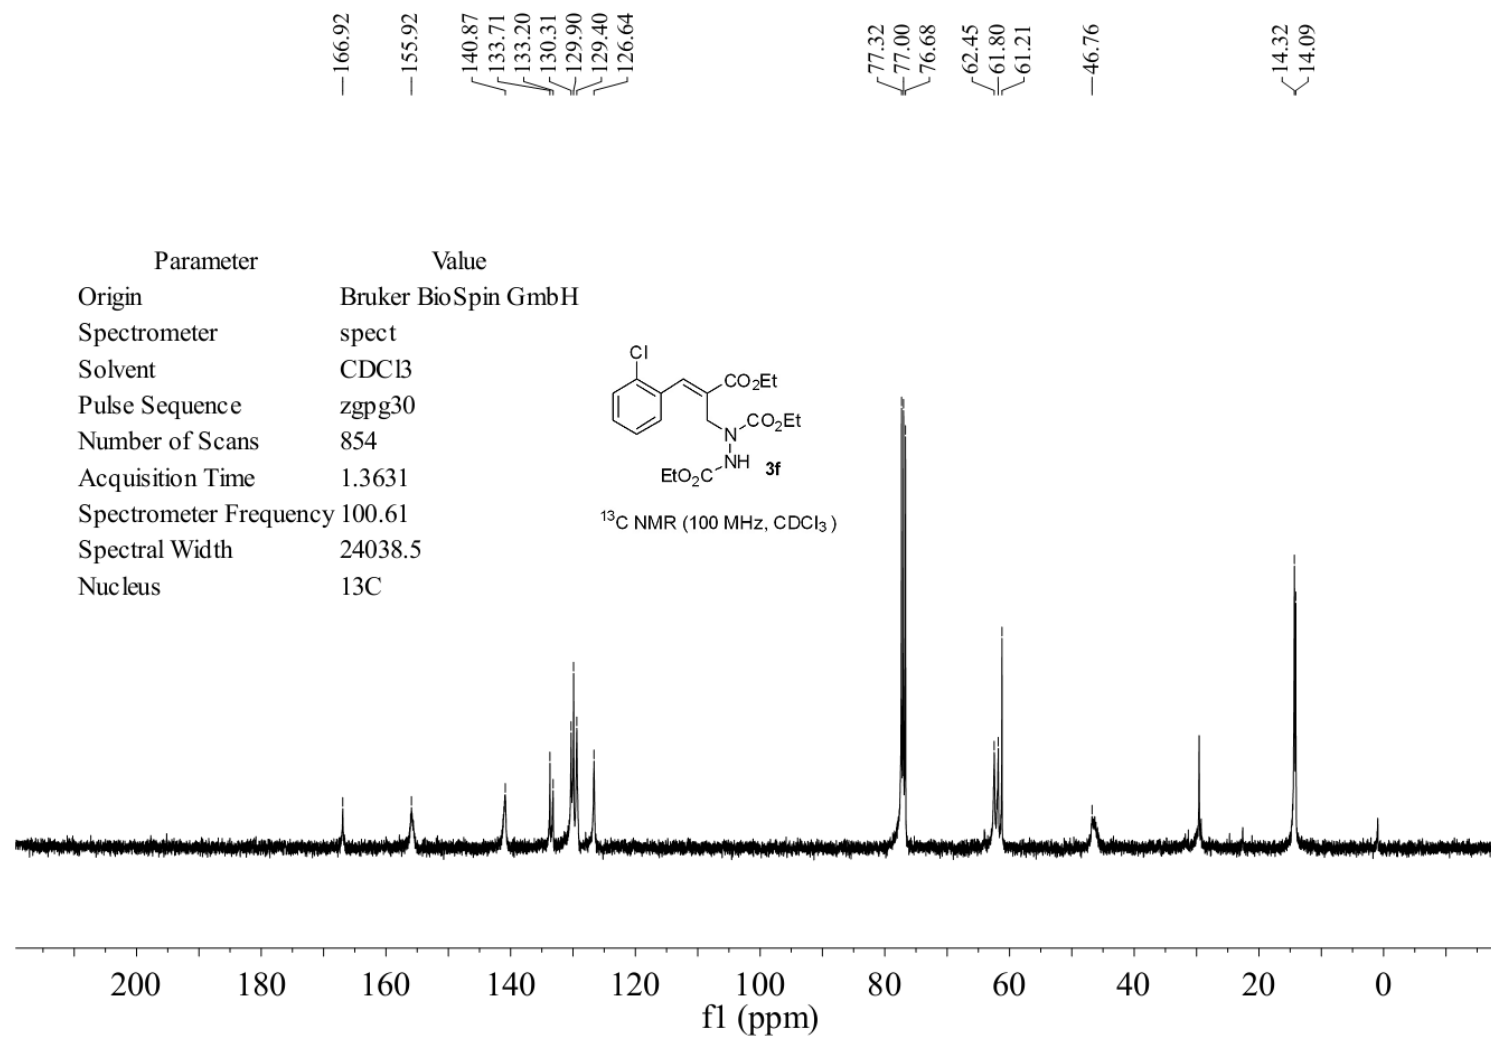

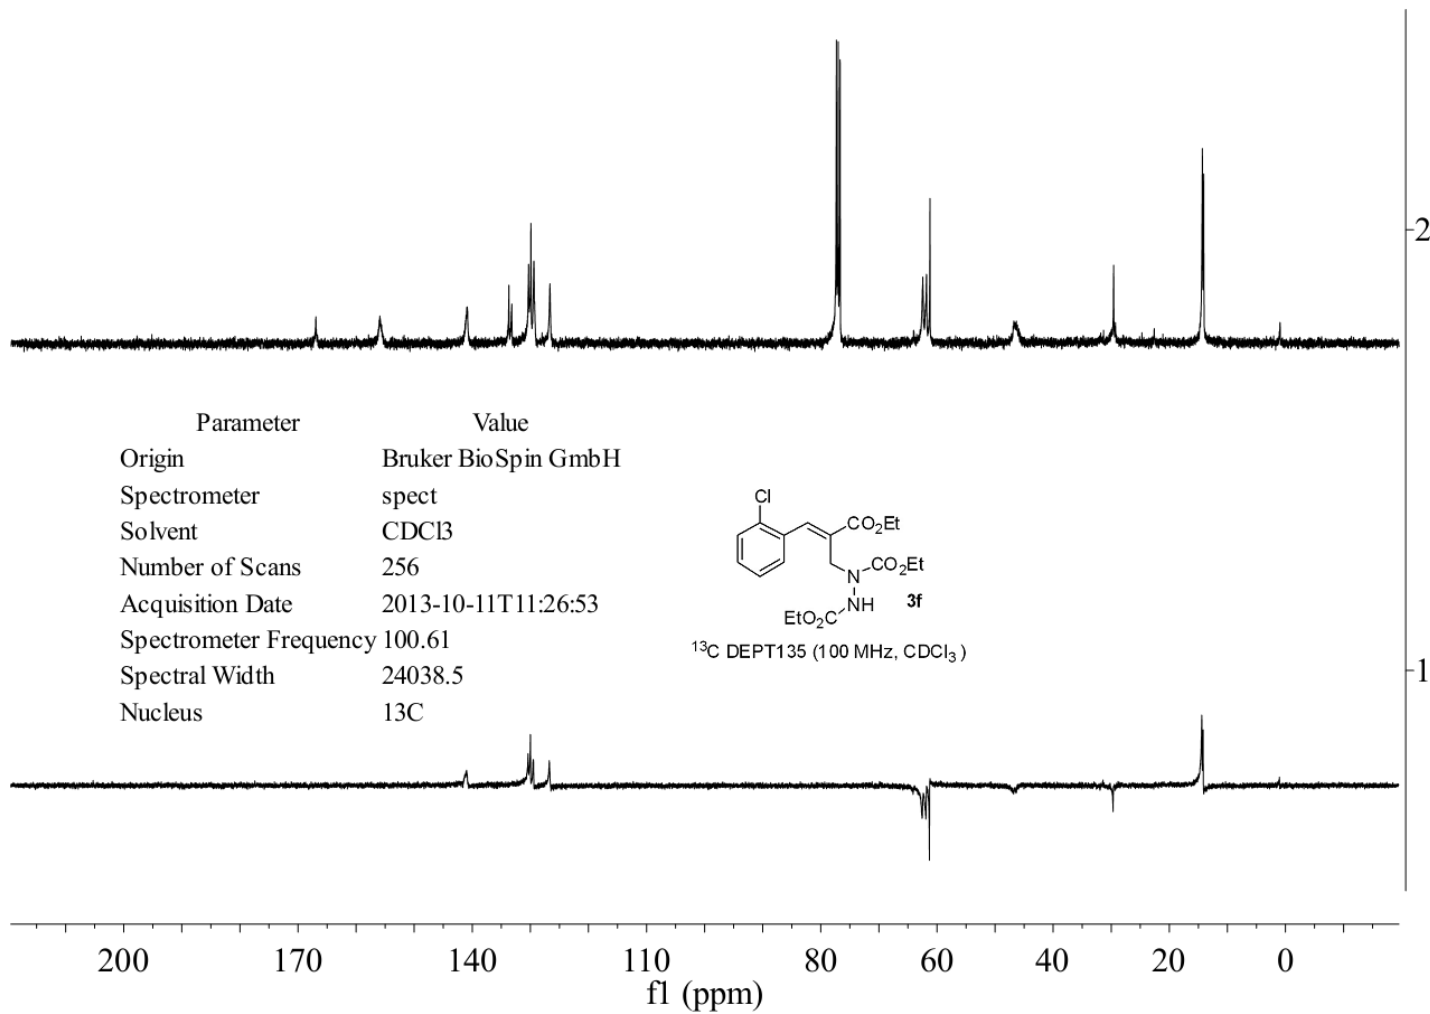

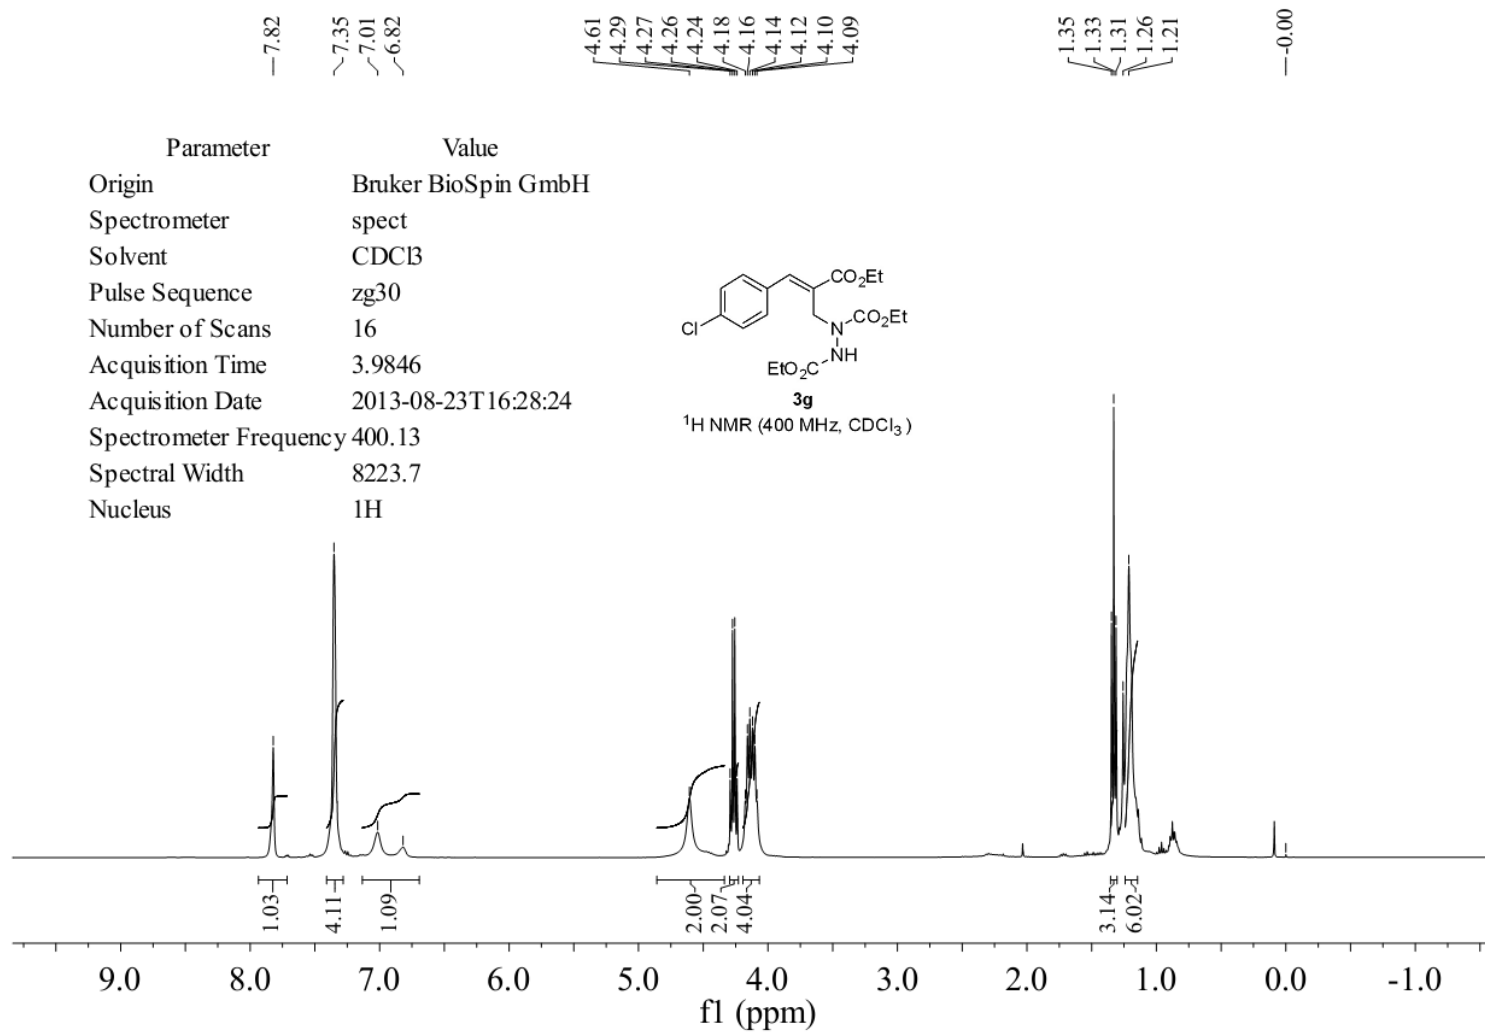

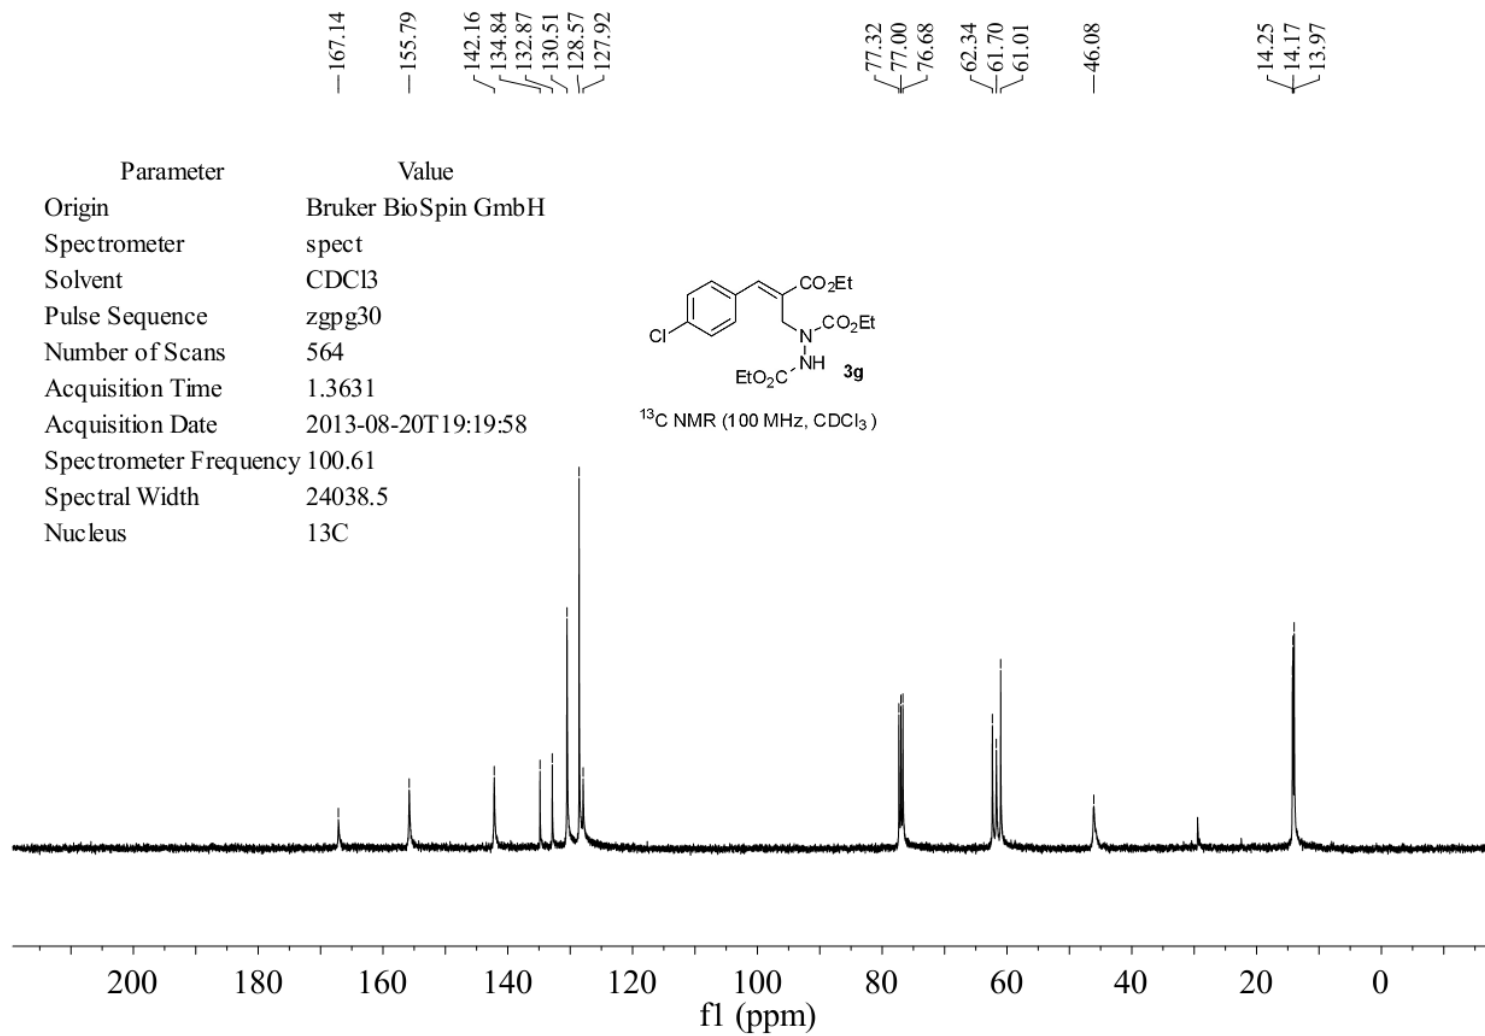

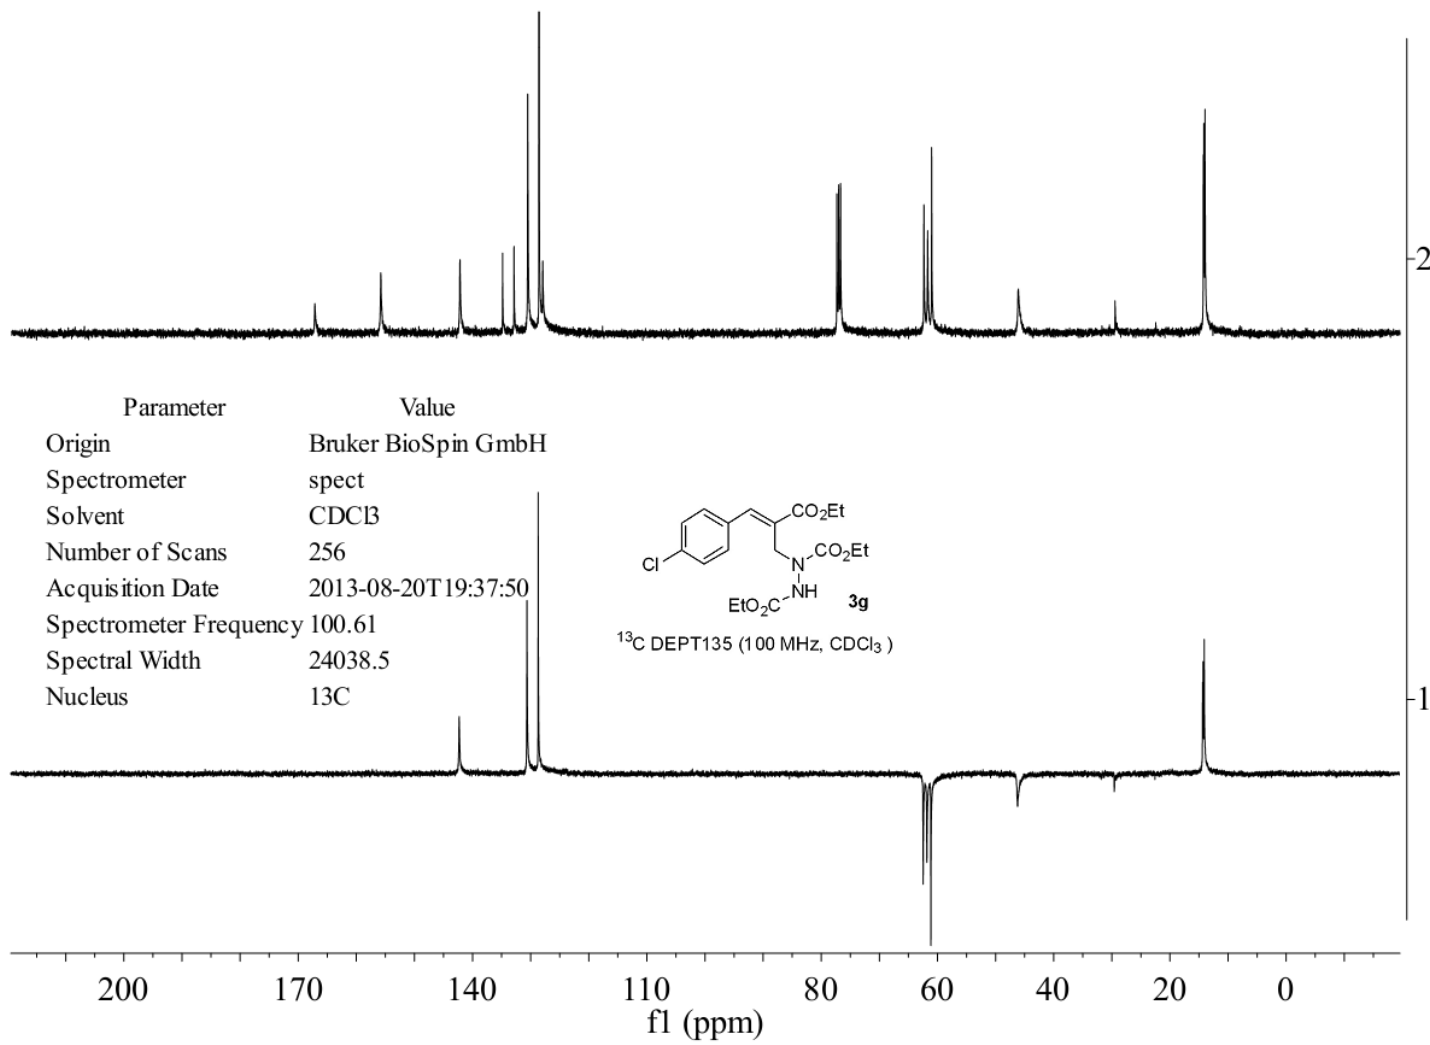

7.76  
7.33  
7.01  
6.99  
6.97  
6.76

4.53  
4.09  
4.07  
4.06  
4.04  
3.72

1.17  
1.16  
1.14  
1.13

| Parameter        | Value               |
|------------------|---------------------|
| Origin           | Bruker BioSpin GmbH |
| Spectrometer     | spect               |
| Solvent          | CDCl <sub>3</sub>   |
| Number of Scans  | 16                  |
| Acquisition Date | 2013-08-23T16:52:26 |
| Spectrometer     | 400.13              |
| Frequency        |                     |
| Spectral Width   | 8223.7              |
| Nucleus          | <sup>1</sup> H      |

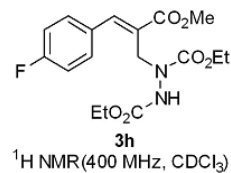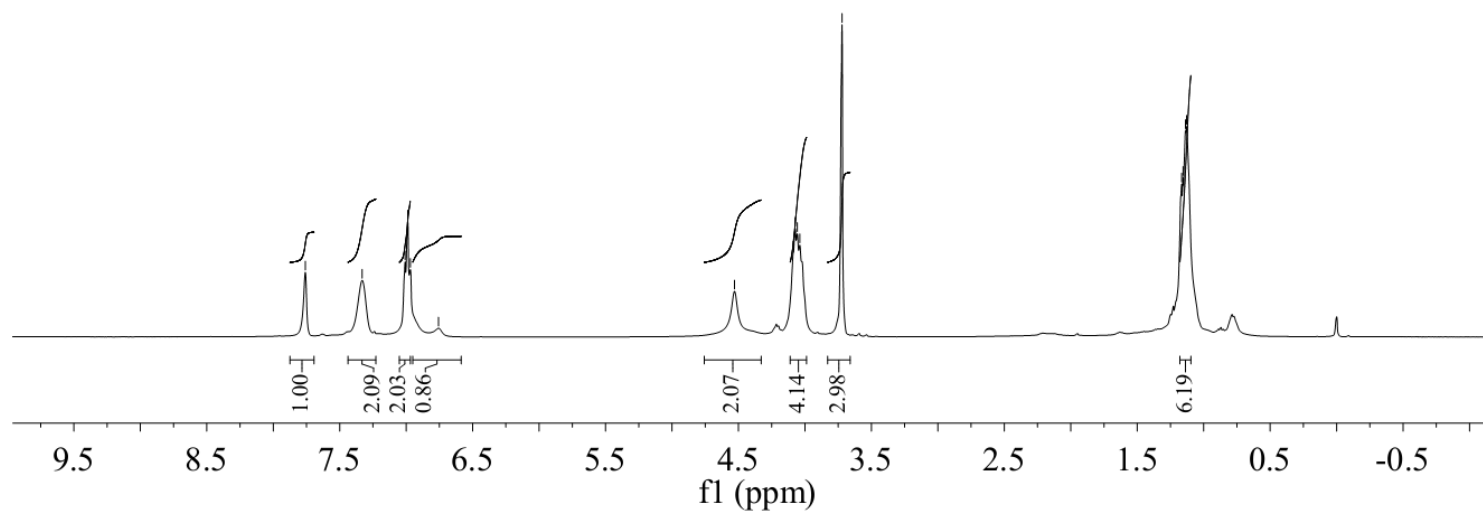

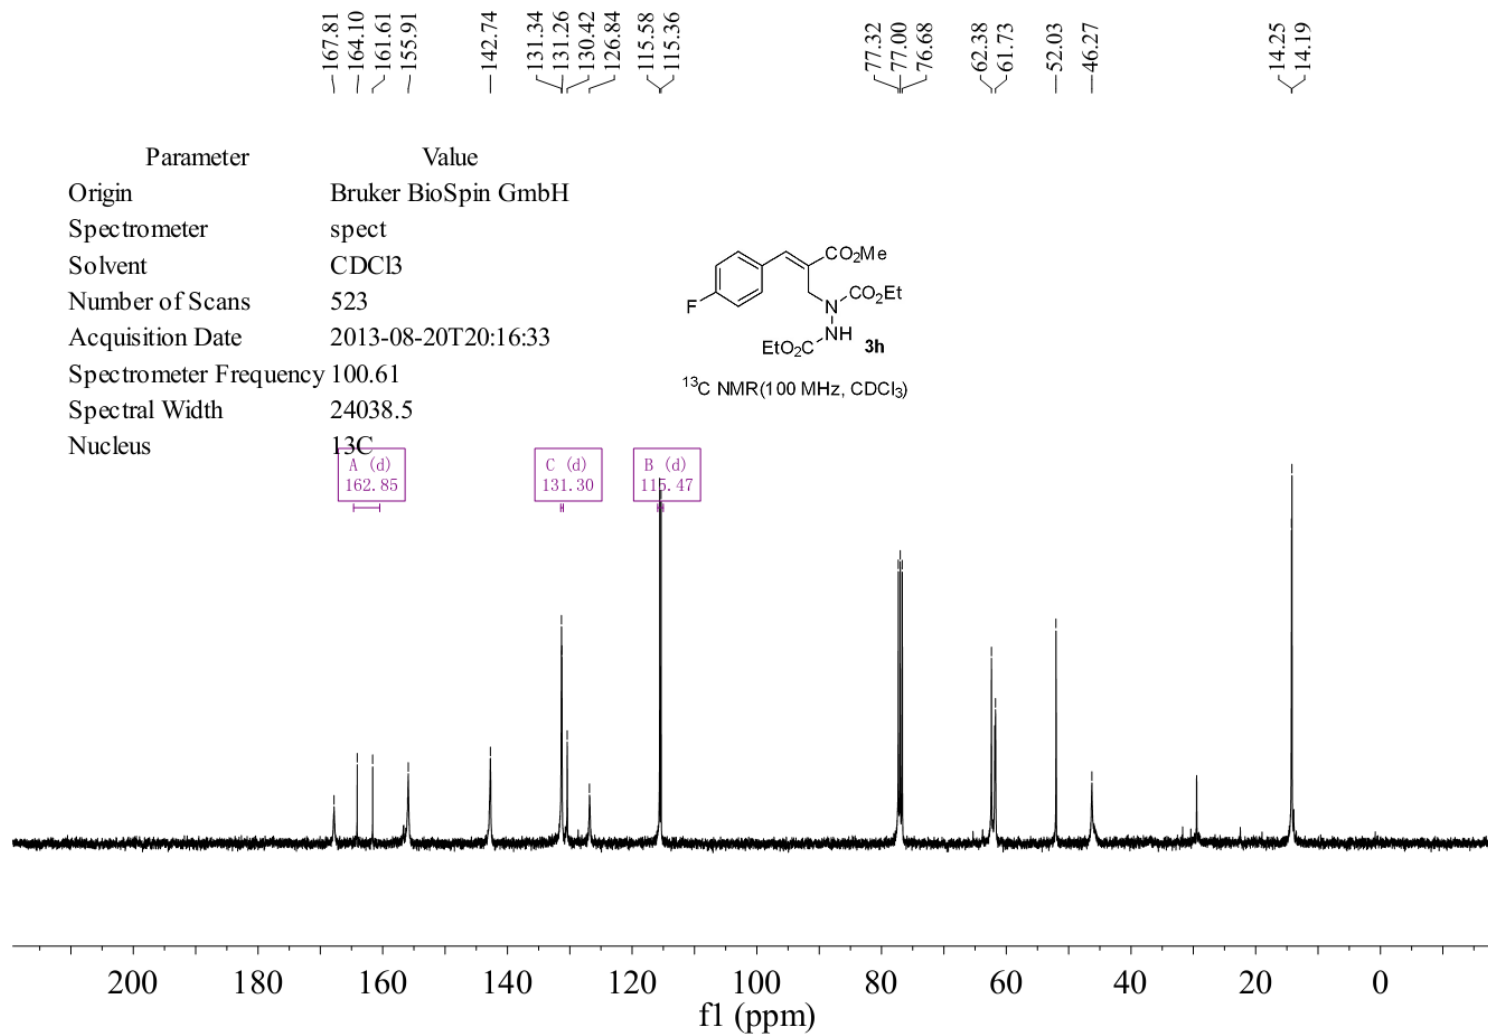



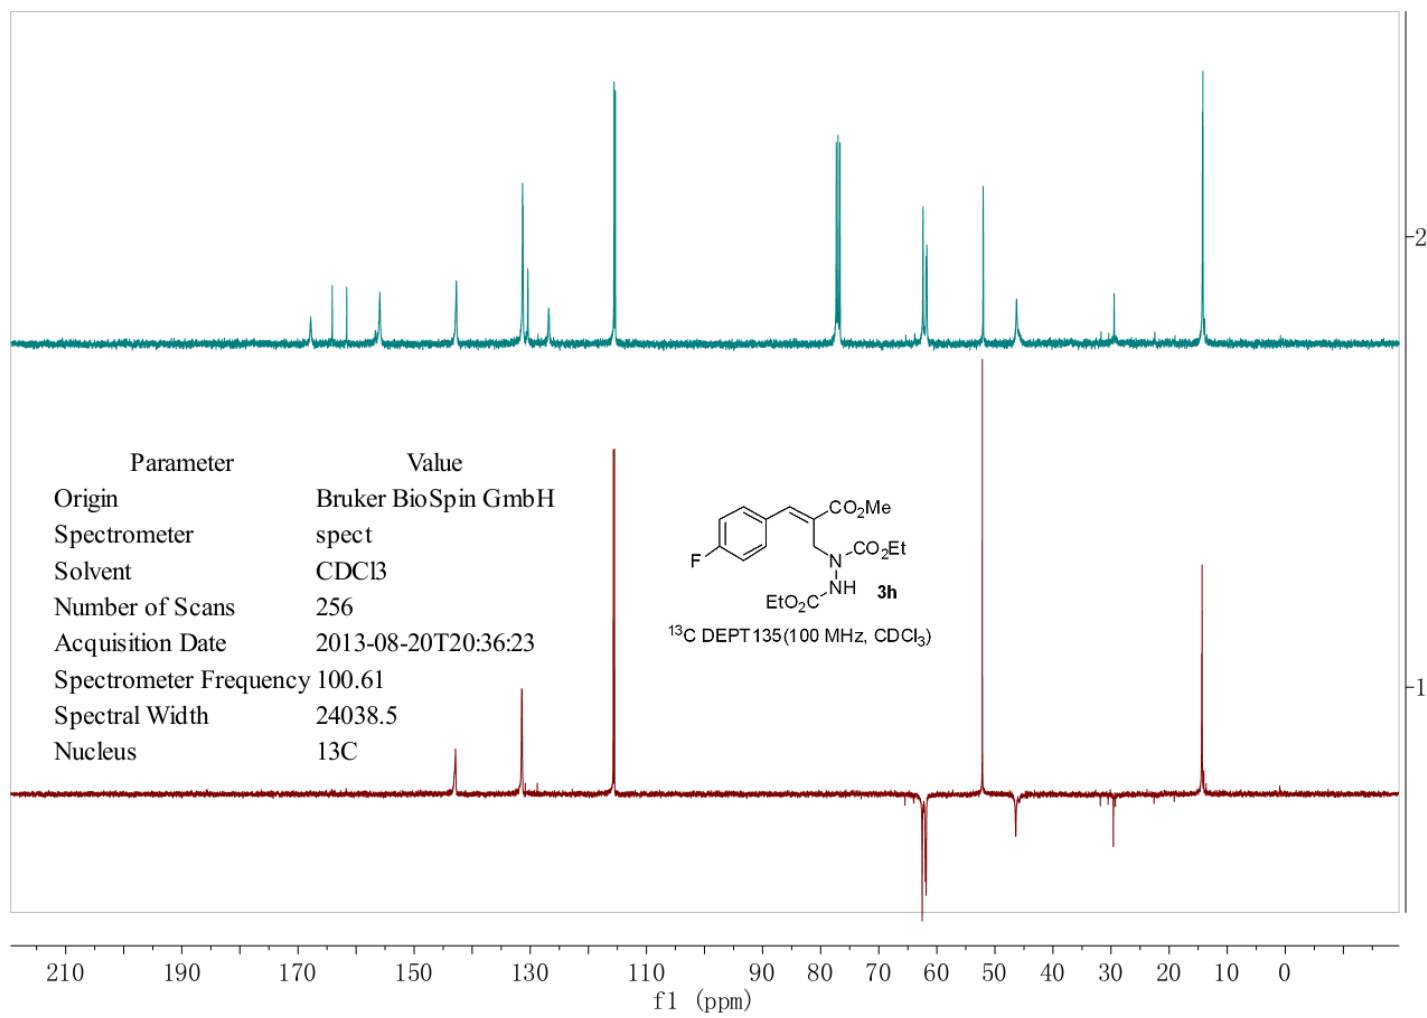

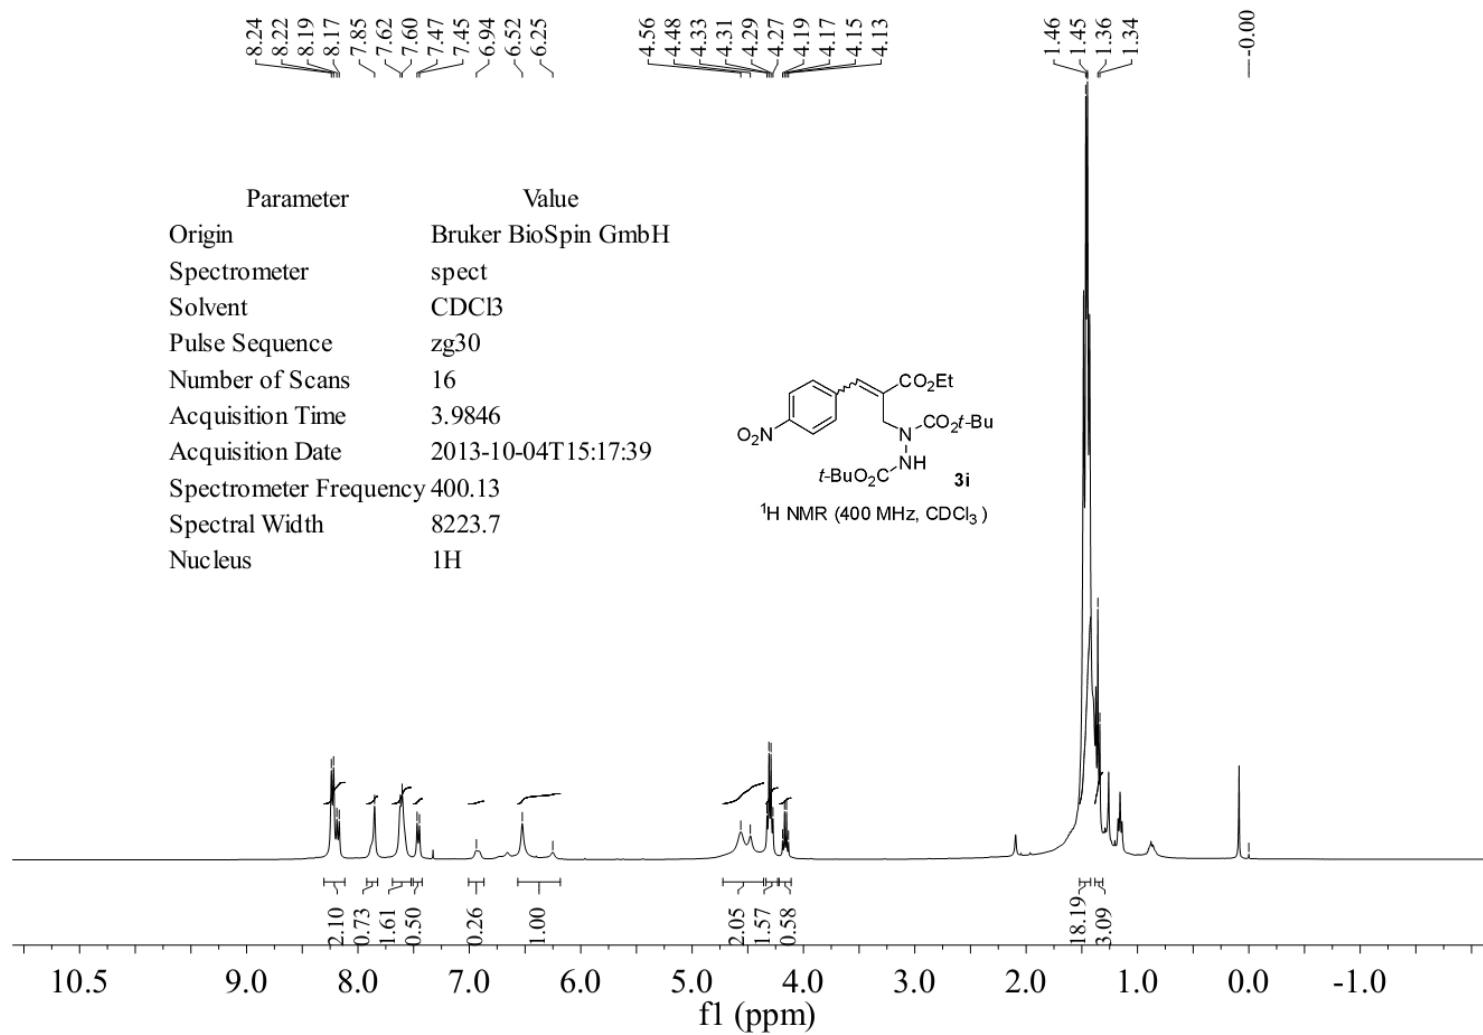

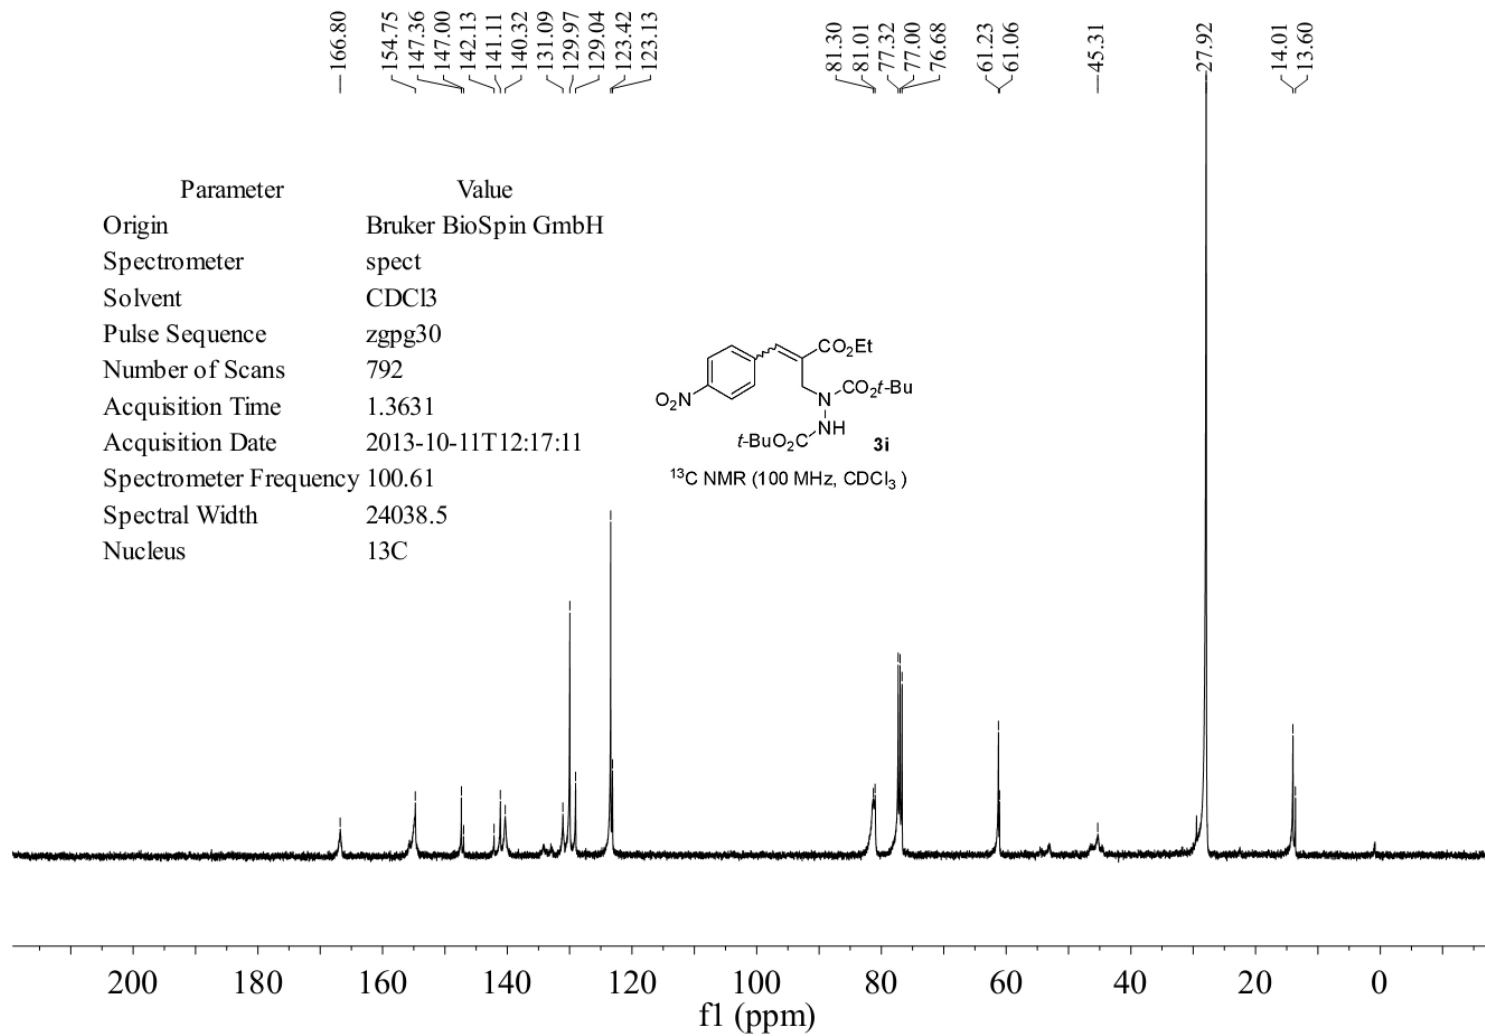

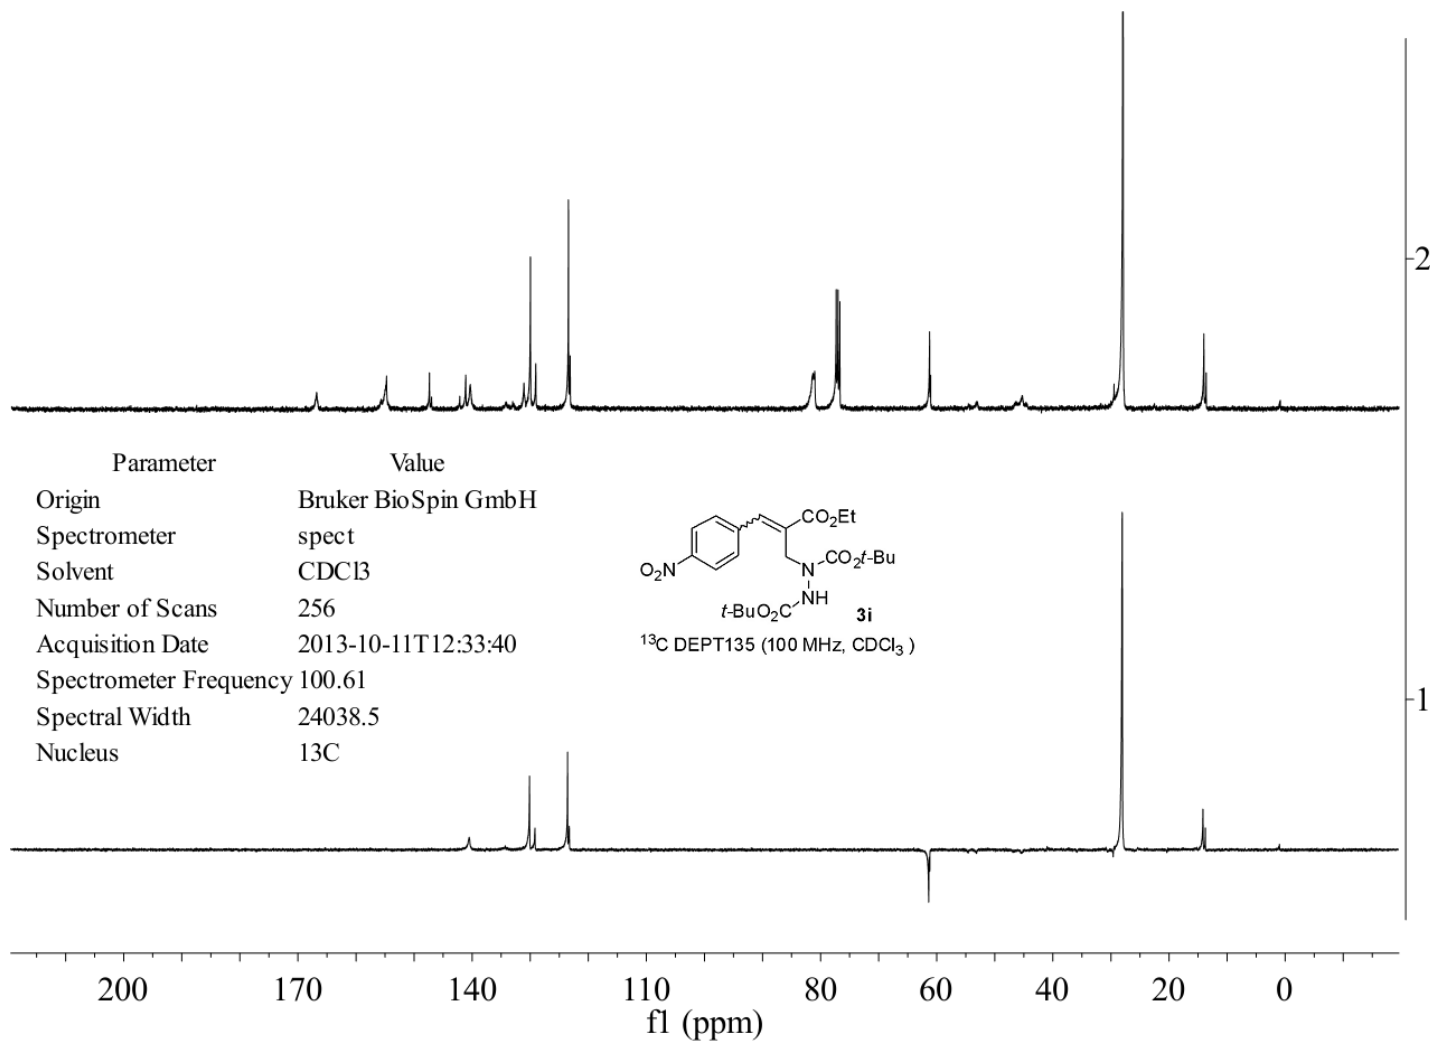

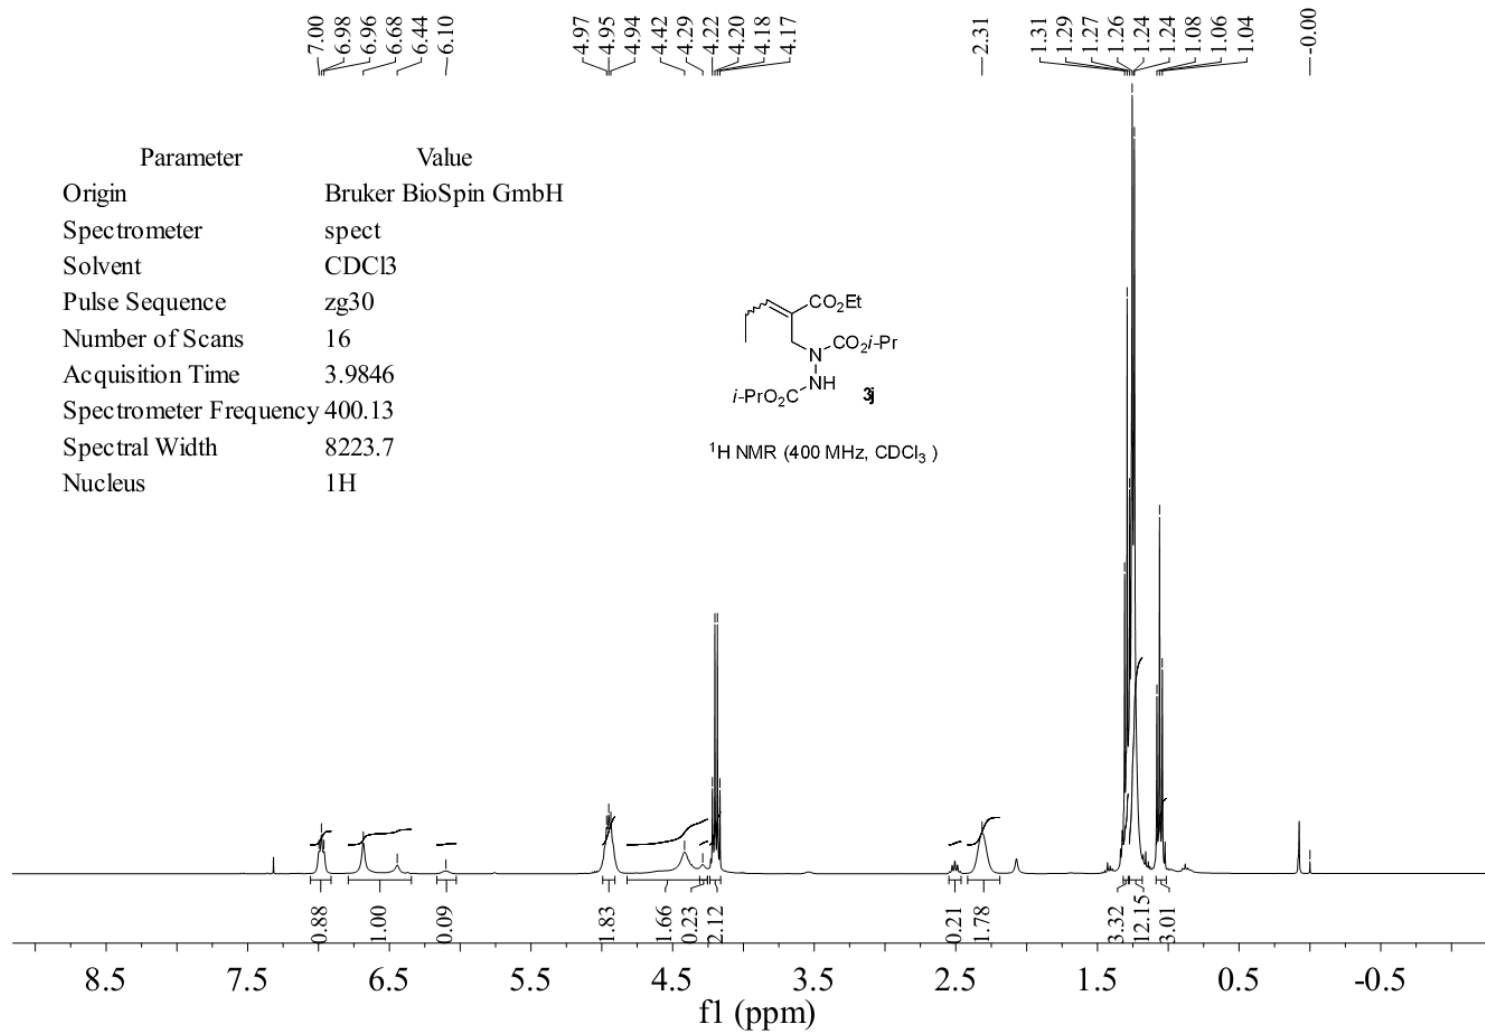

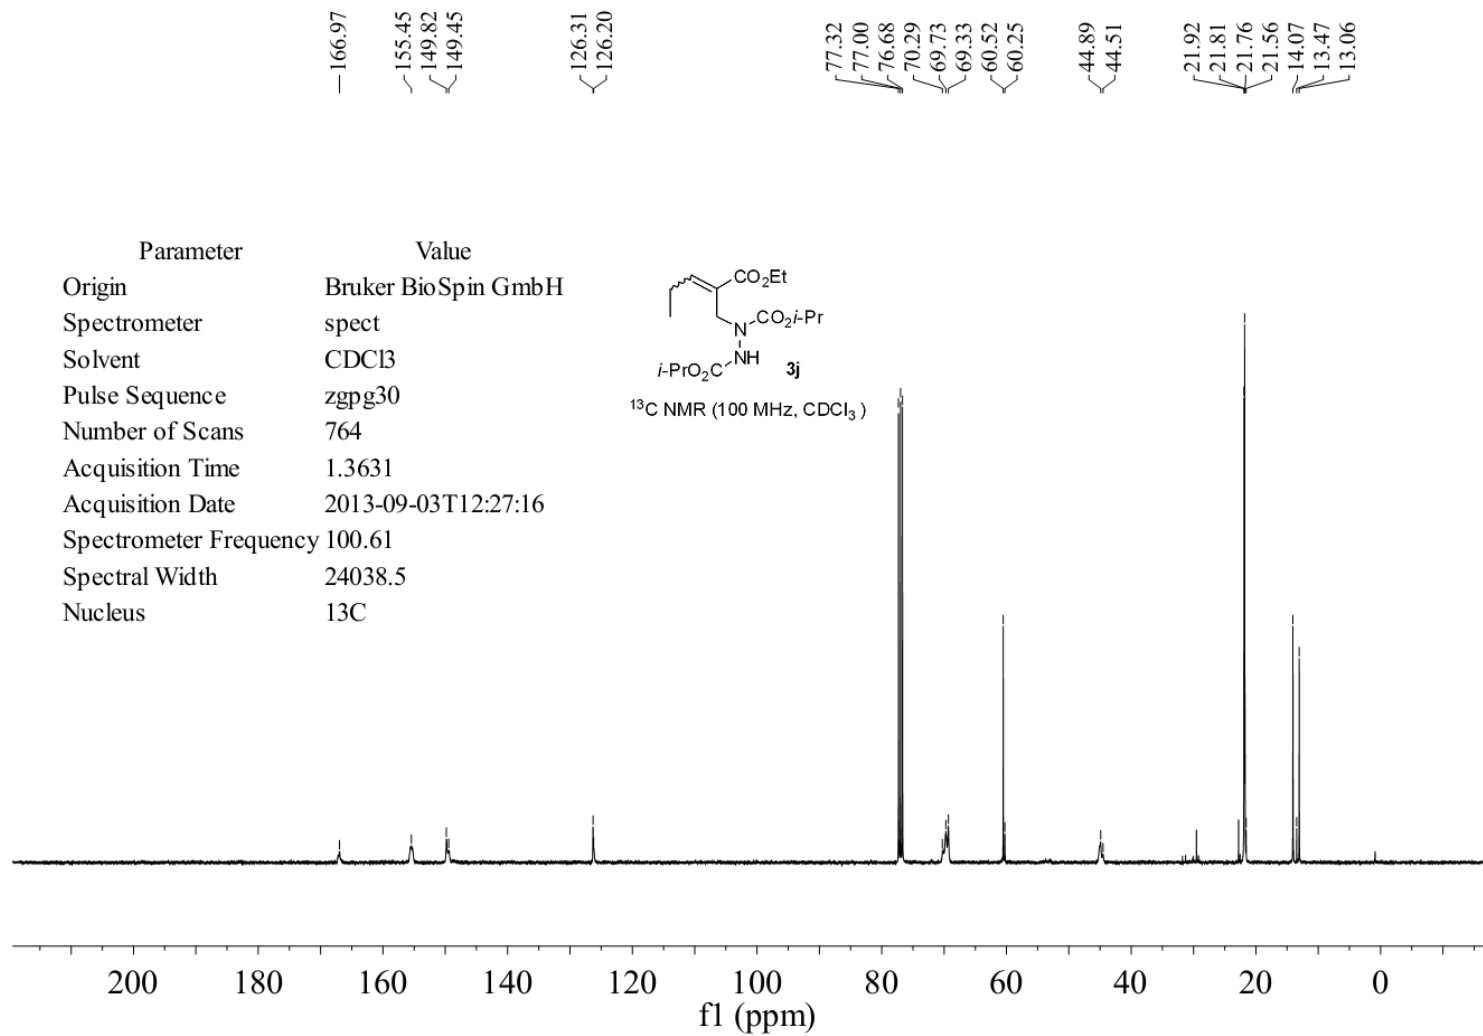

| Parameter              | Value               |
|------------------------|---------------------|
| Origin                 | Bruker BioSpin GmbH |
| Spectrometer           | spect               |
| Solvent                | CDCl <sub>3</sub>   |
| Pulse Sequence         | zgpg30              |
| Number of Scans        | 764                 |
| Acquisition Time       | 1.3631              |
| Acquisition Date       | 2013-09-03T12:27:16 |
| Spectrometer Frequency | 100.61              |
| Spectral Width         | 24038.5             |
| Nucleus                | <sup>13</sup> C     |

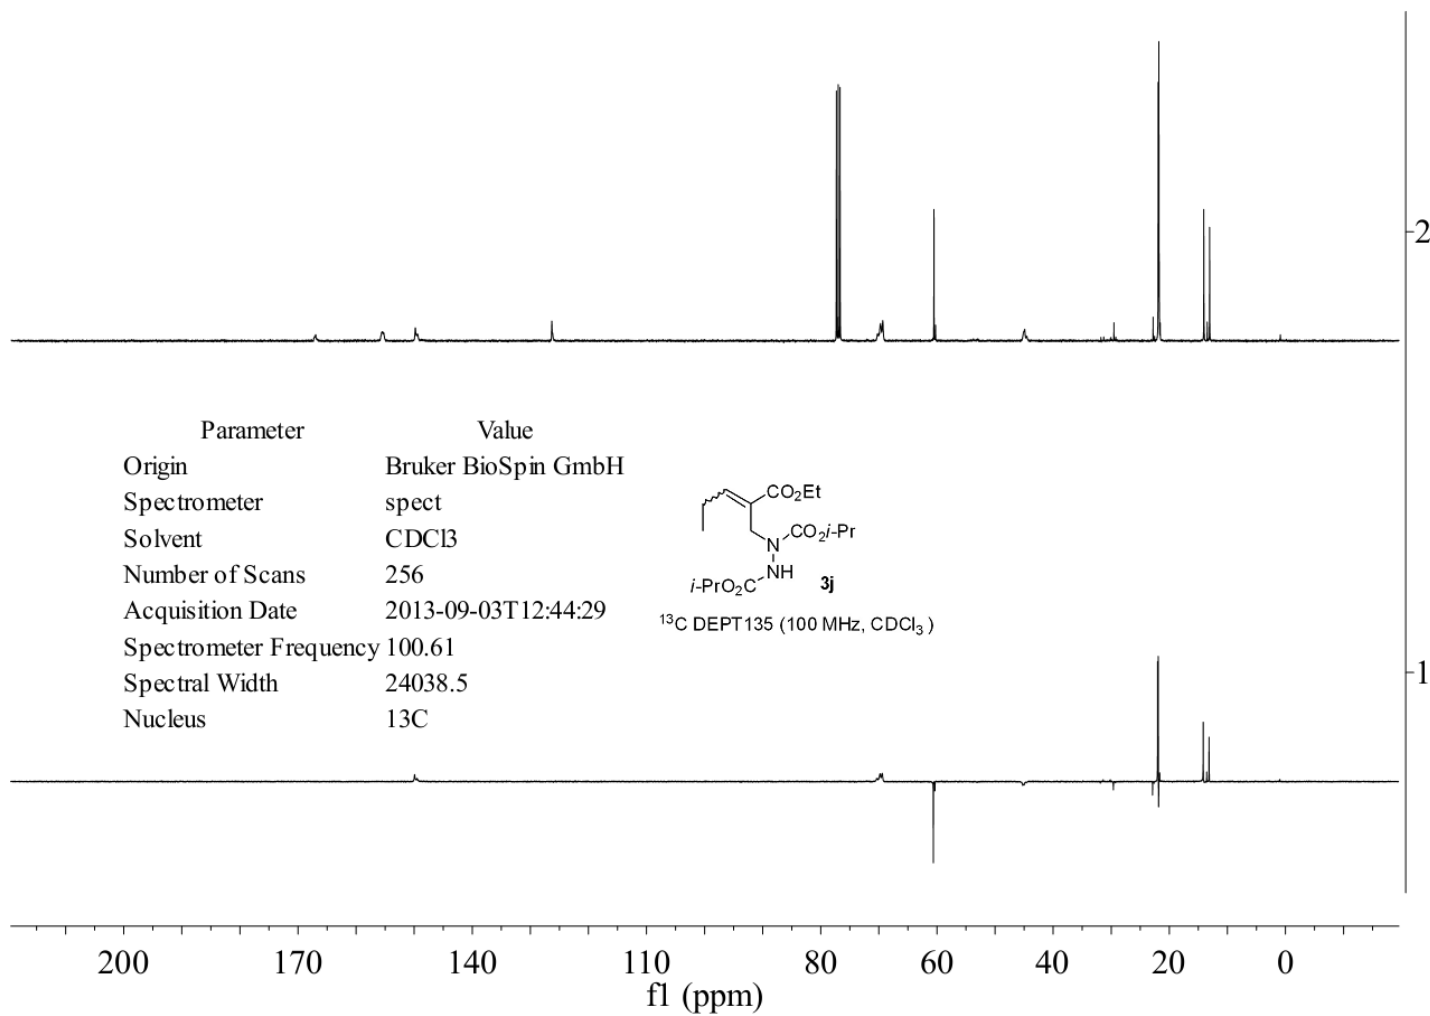

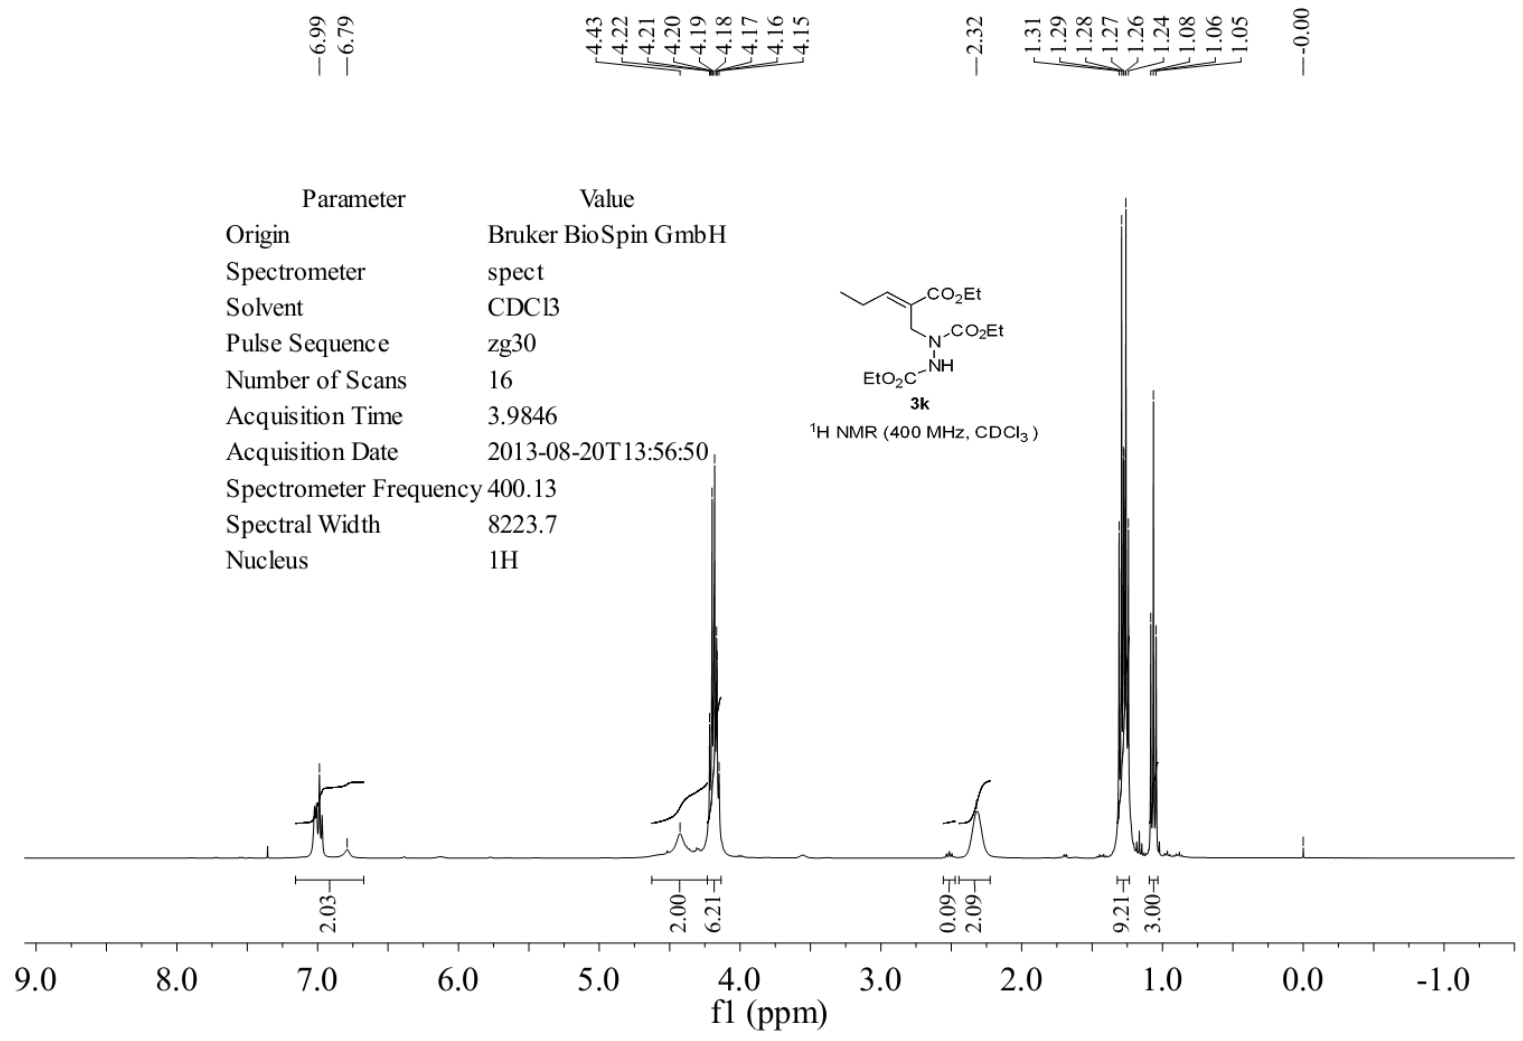



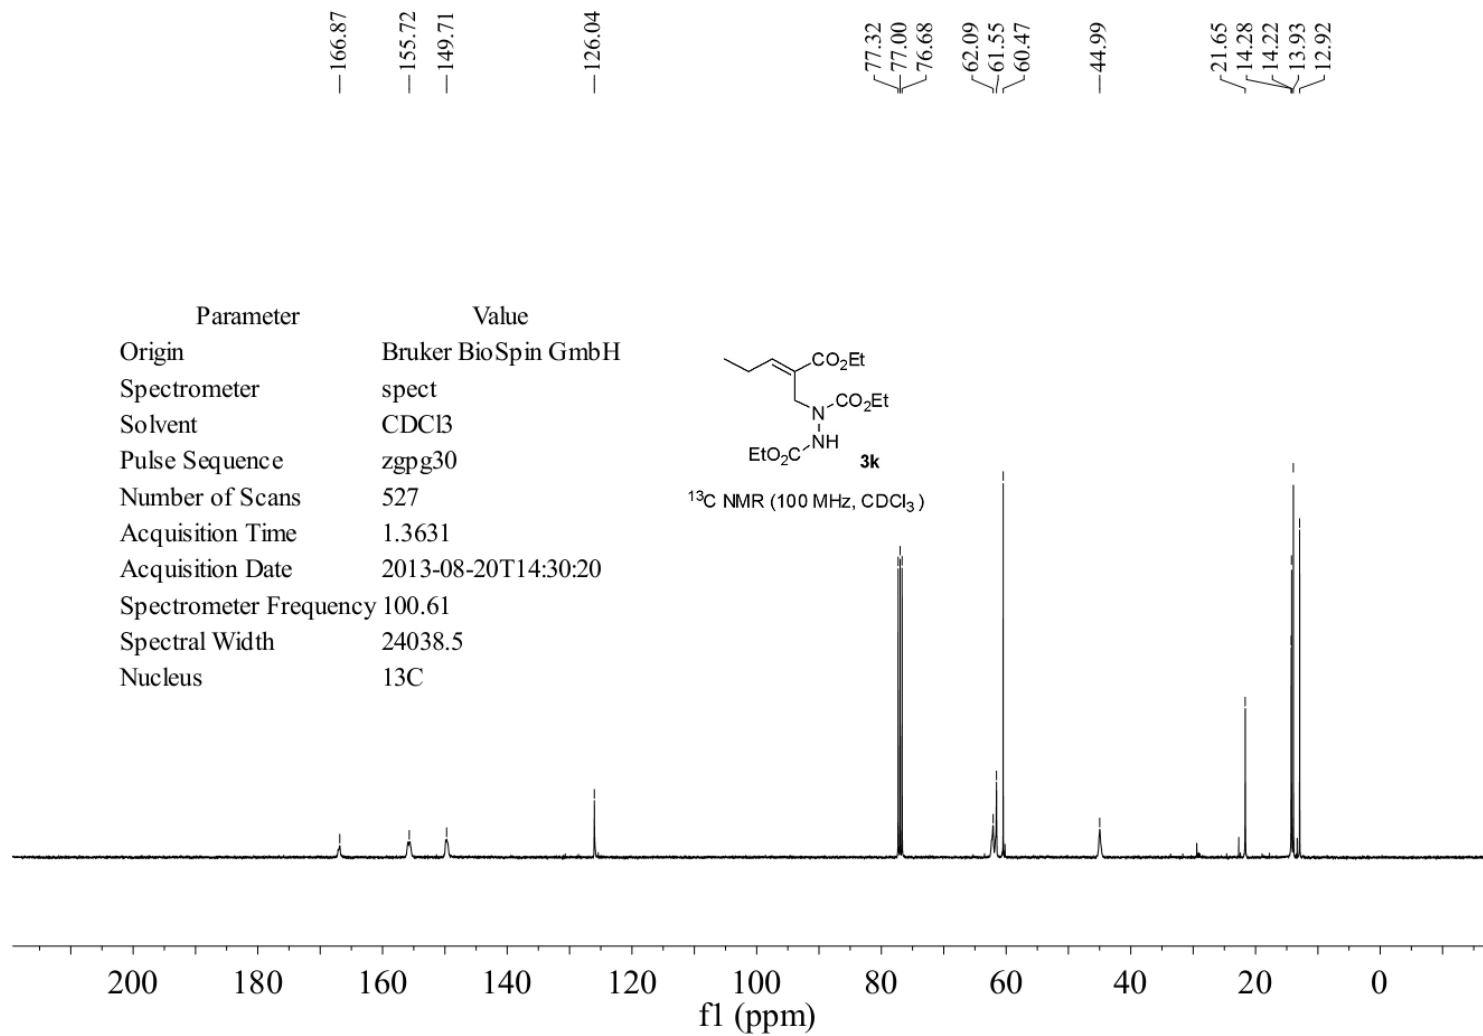

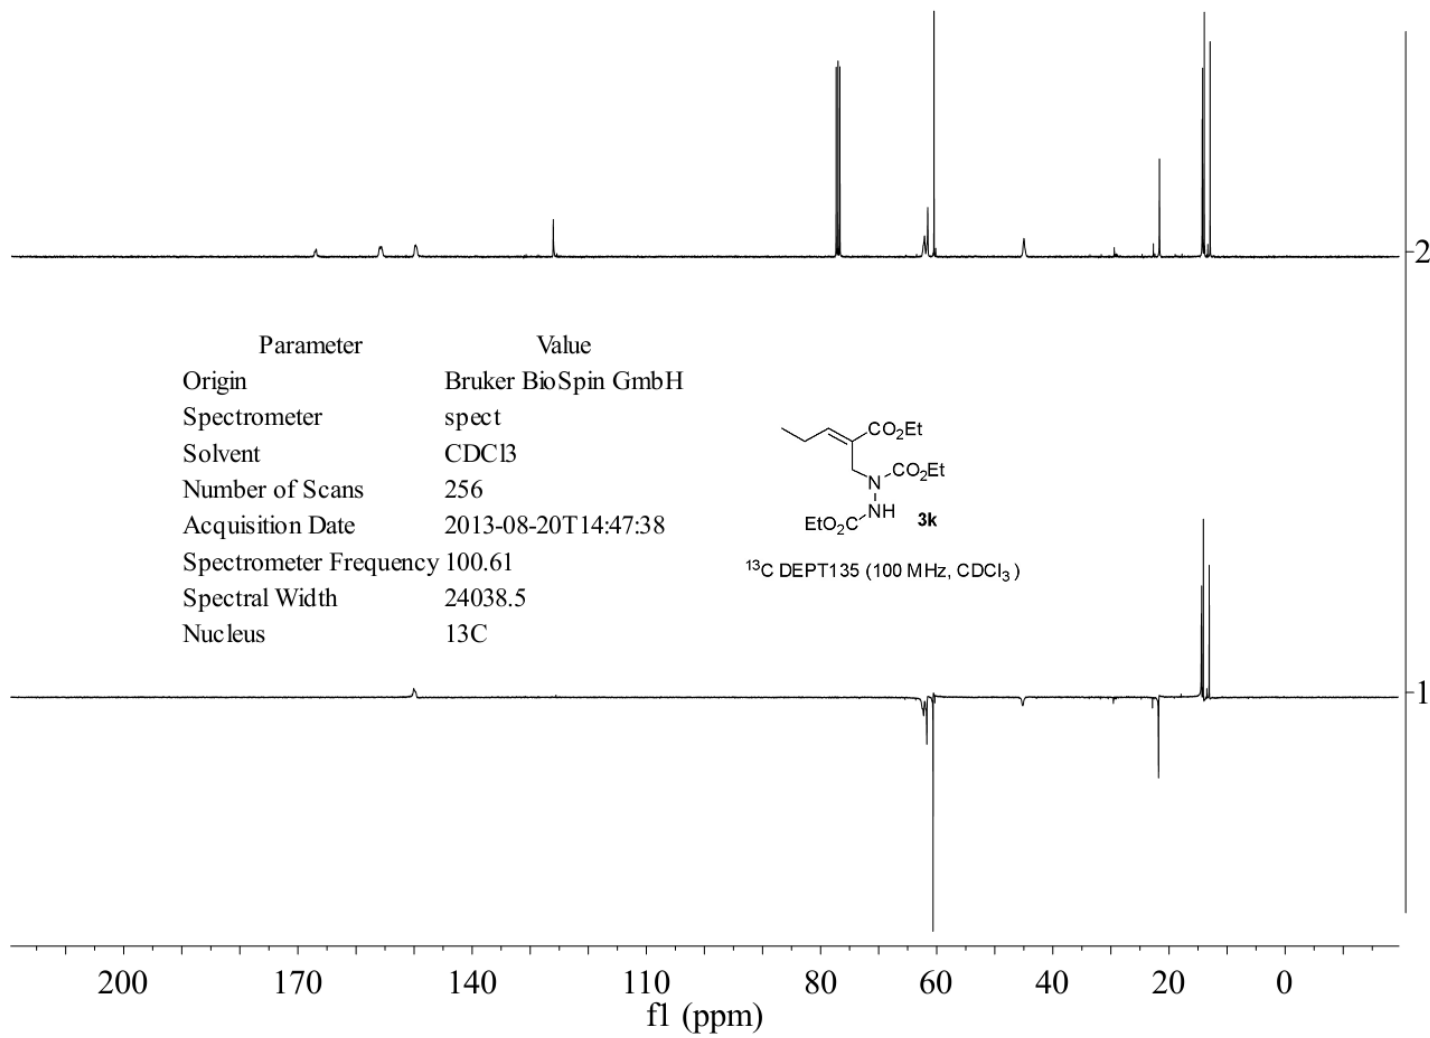

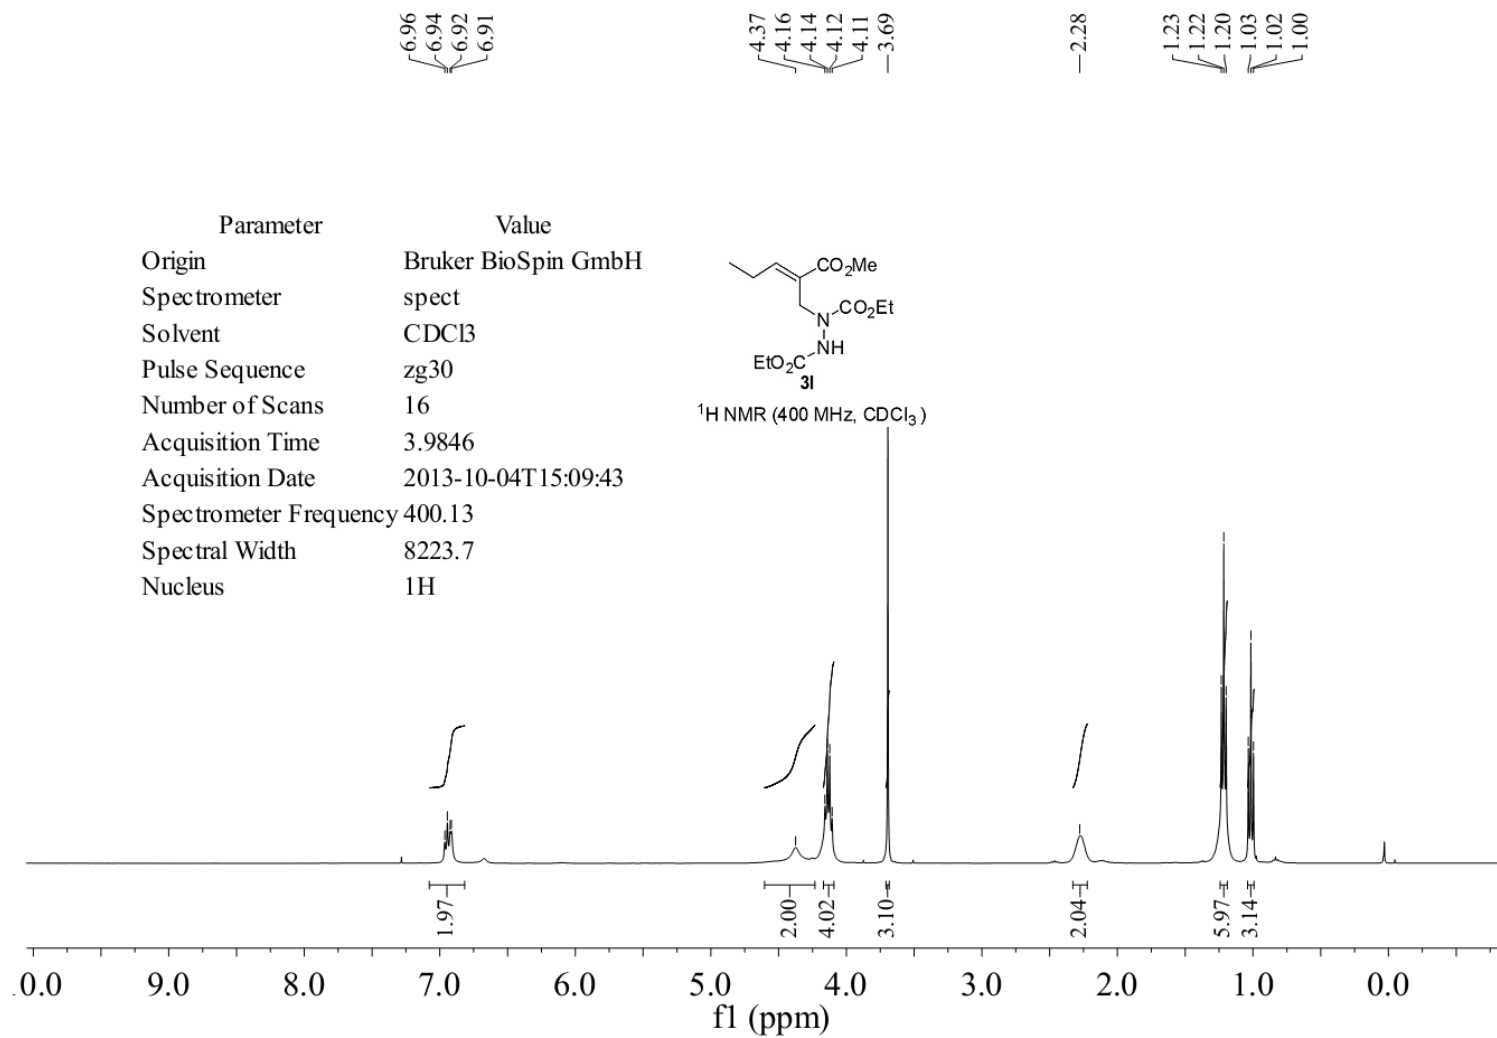

-167.36  
 -155.99  
 -150.29  
 -125.80  
 77.32  
 77.00  
 76.68  
 62.24  
 61.65  
 51.68  
 45.19  
 21.73  
 14.33  
 14.28  
 12.96

| Parameter              | Value               |
|------------------------|---------------------|
| Origin                 | Bruker BioSpin GmbH |
| Spectrometer           | spect               |
| Solvent                | CDCl <sub>3</sub>   |
| Pulse Sequence         | zgpg30              |
| Number of Scans        | 837                 |
| Acquisition Time       | 1.3631              |
| Acquisition Date       | 2013-10-11T08:10:36 |
| Spectrometer Frequency | 100.61              |
| Spectral Width         | 24038.5             |
| Nucleus                | <sup>13</sup> C     |

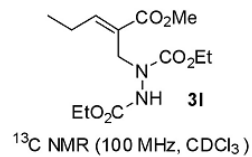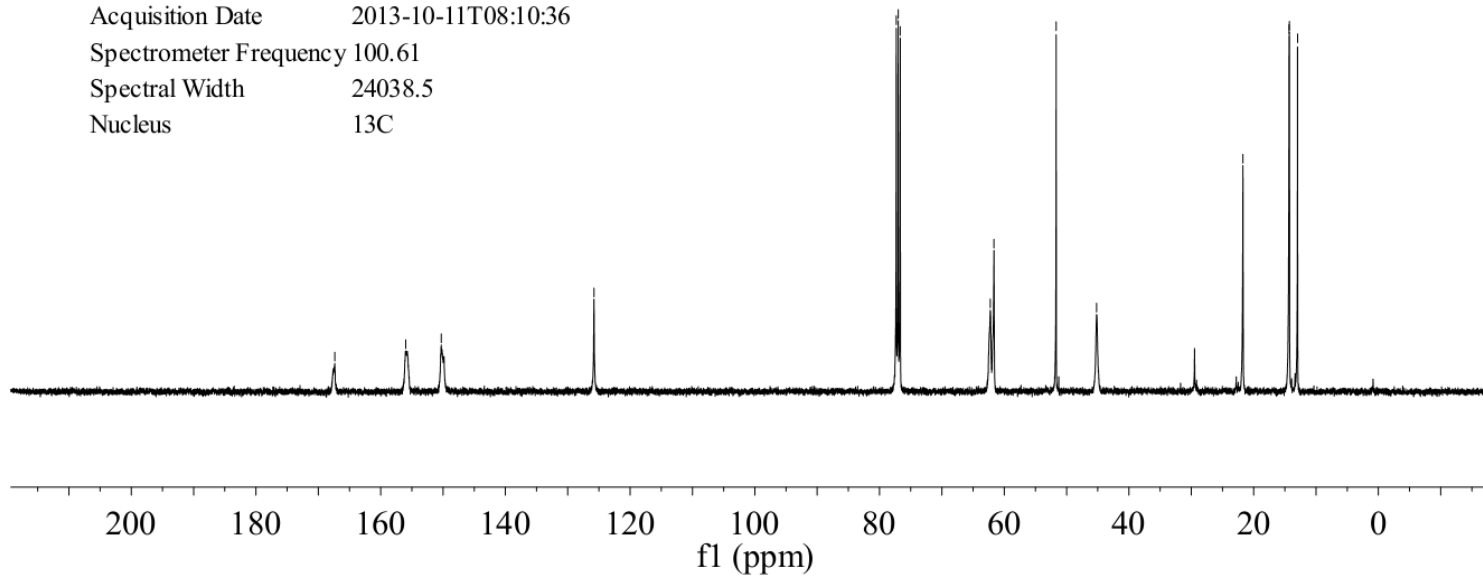

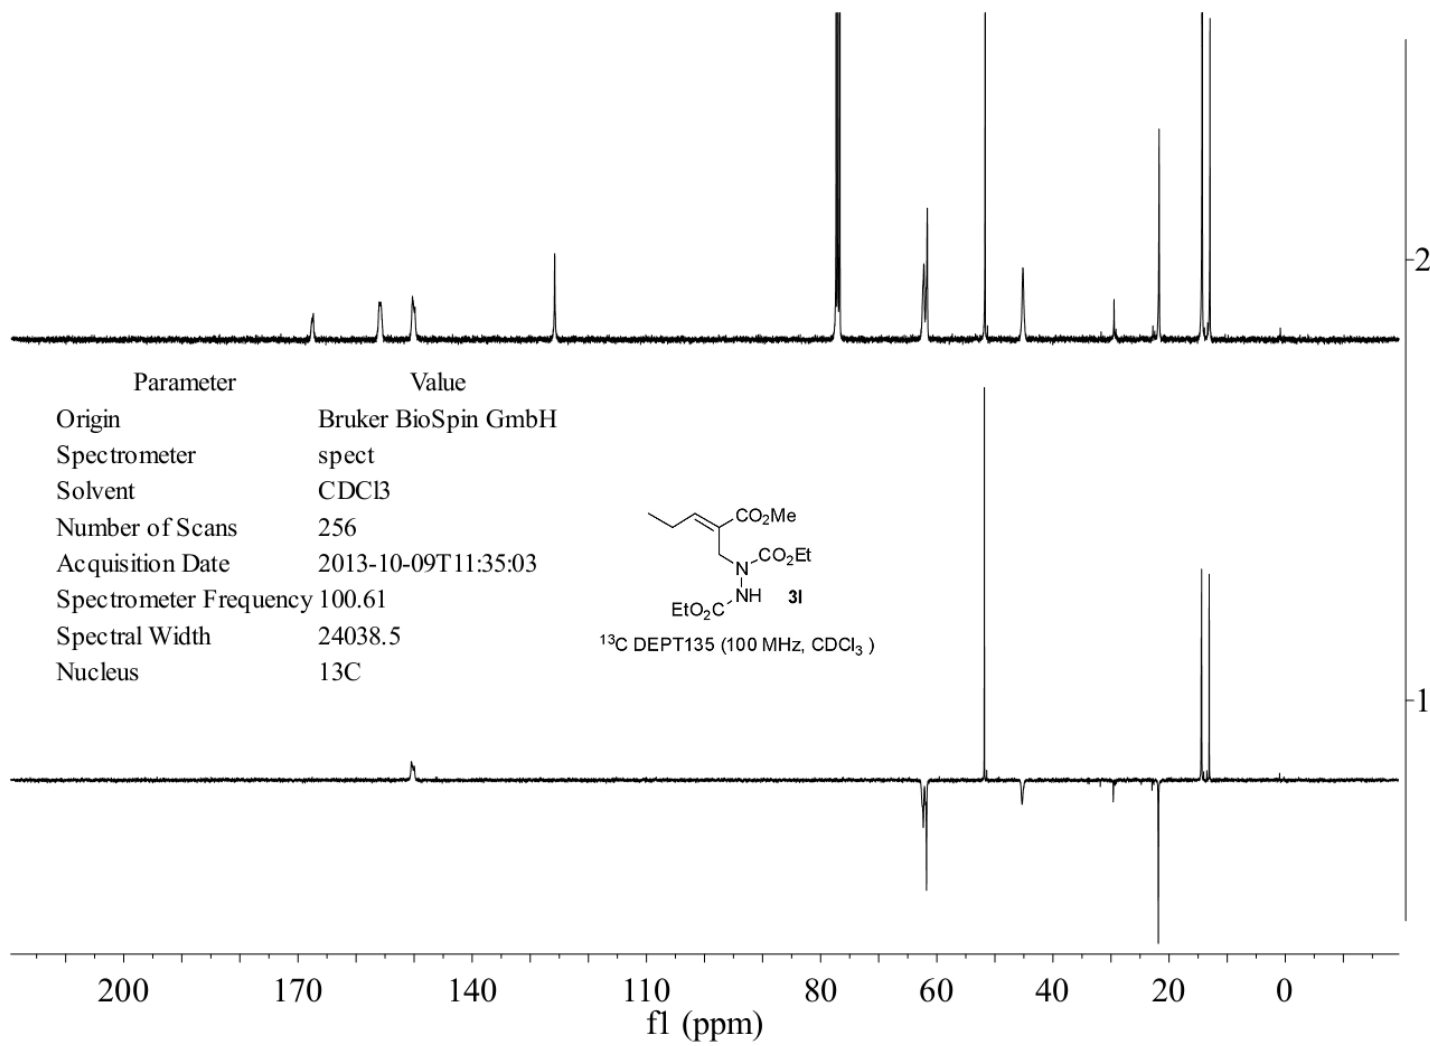

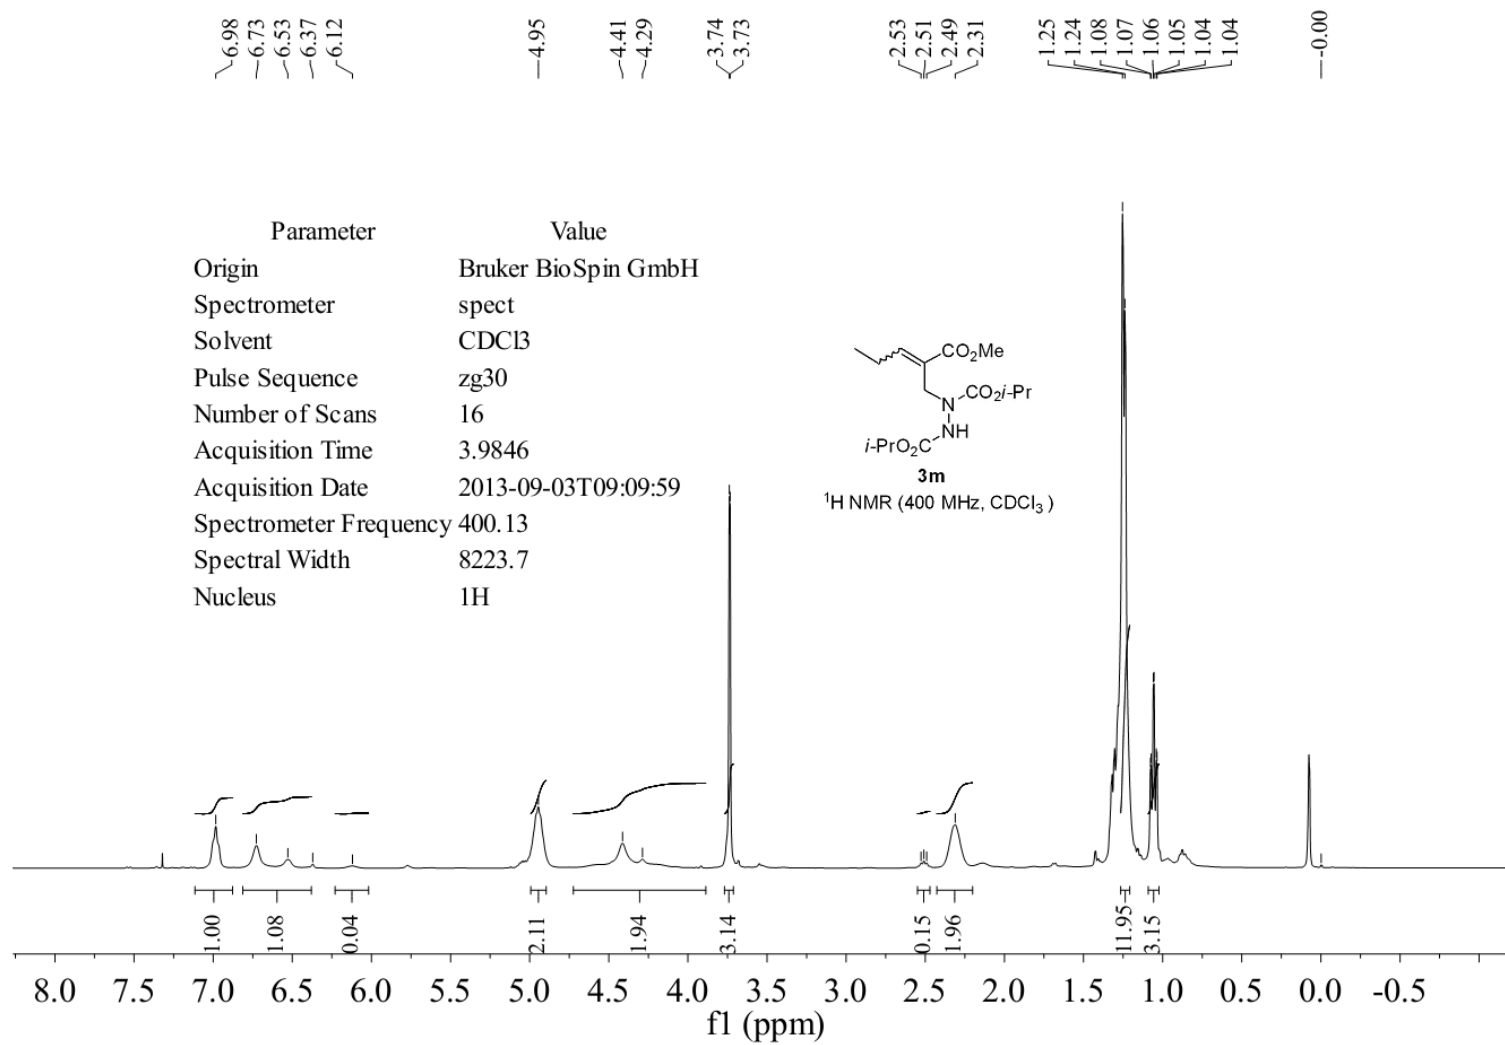

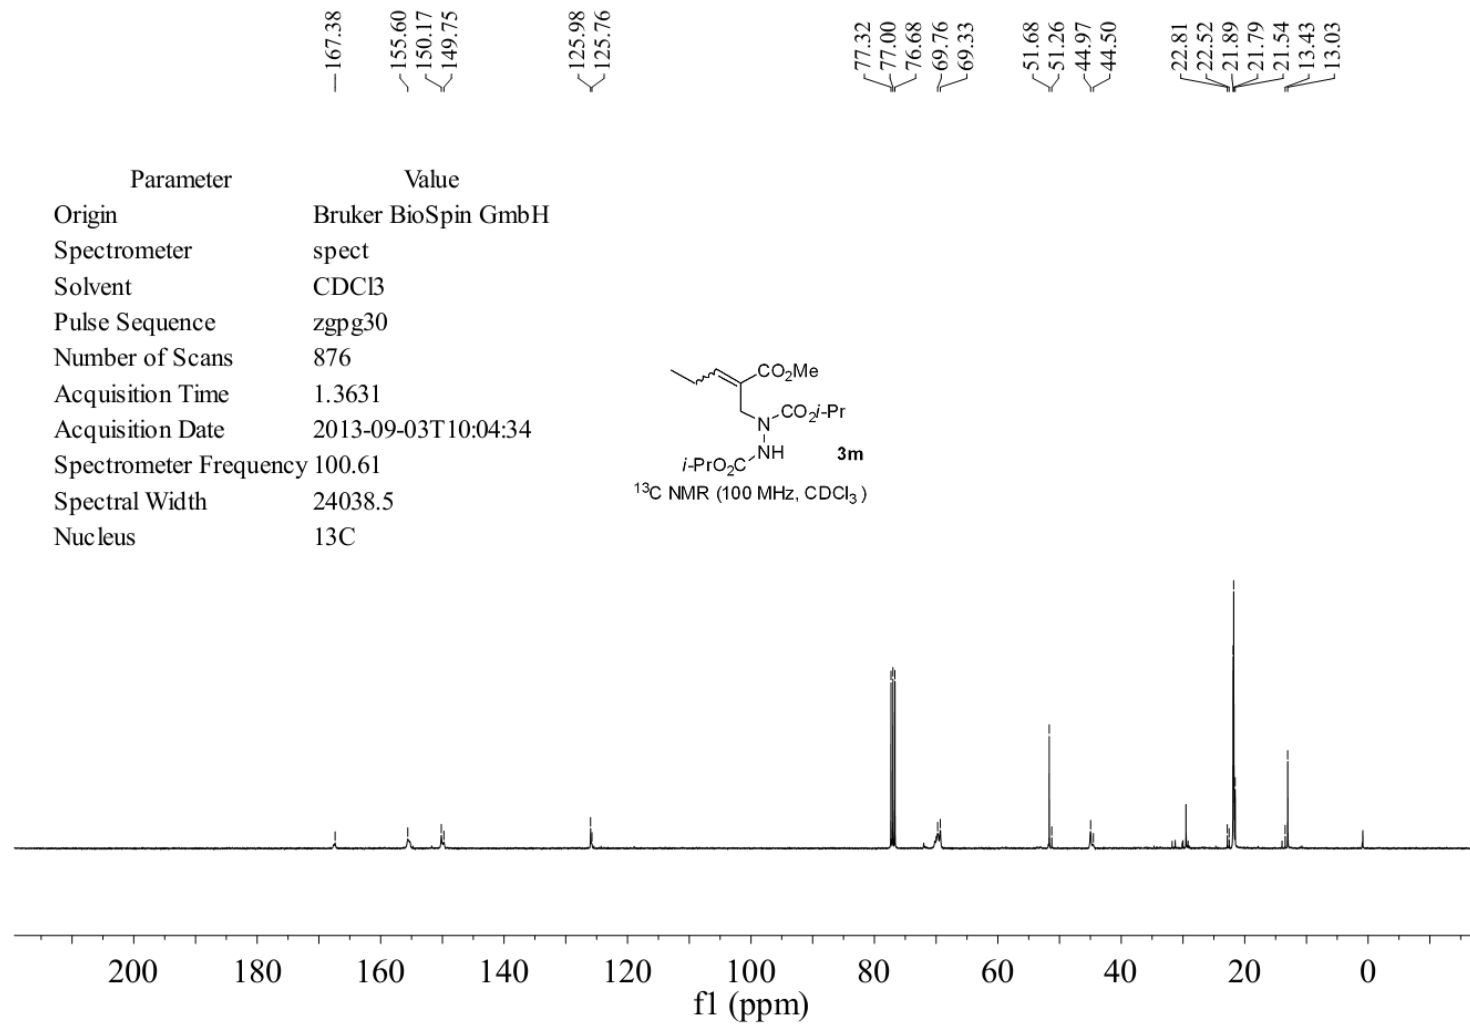

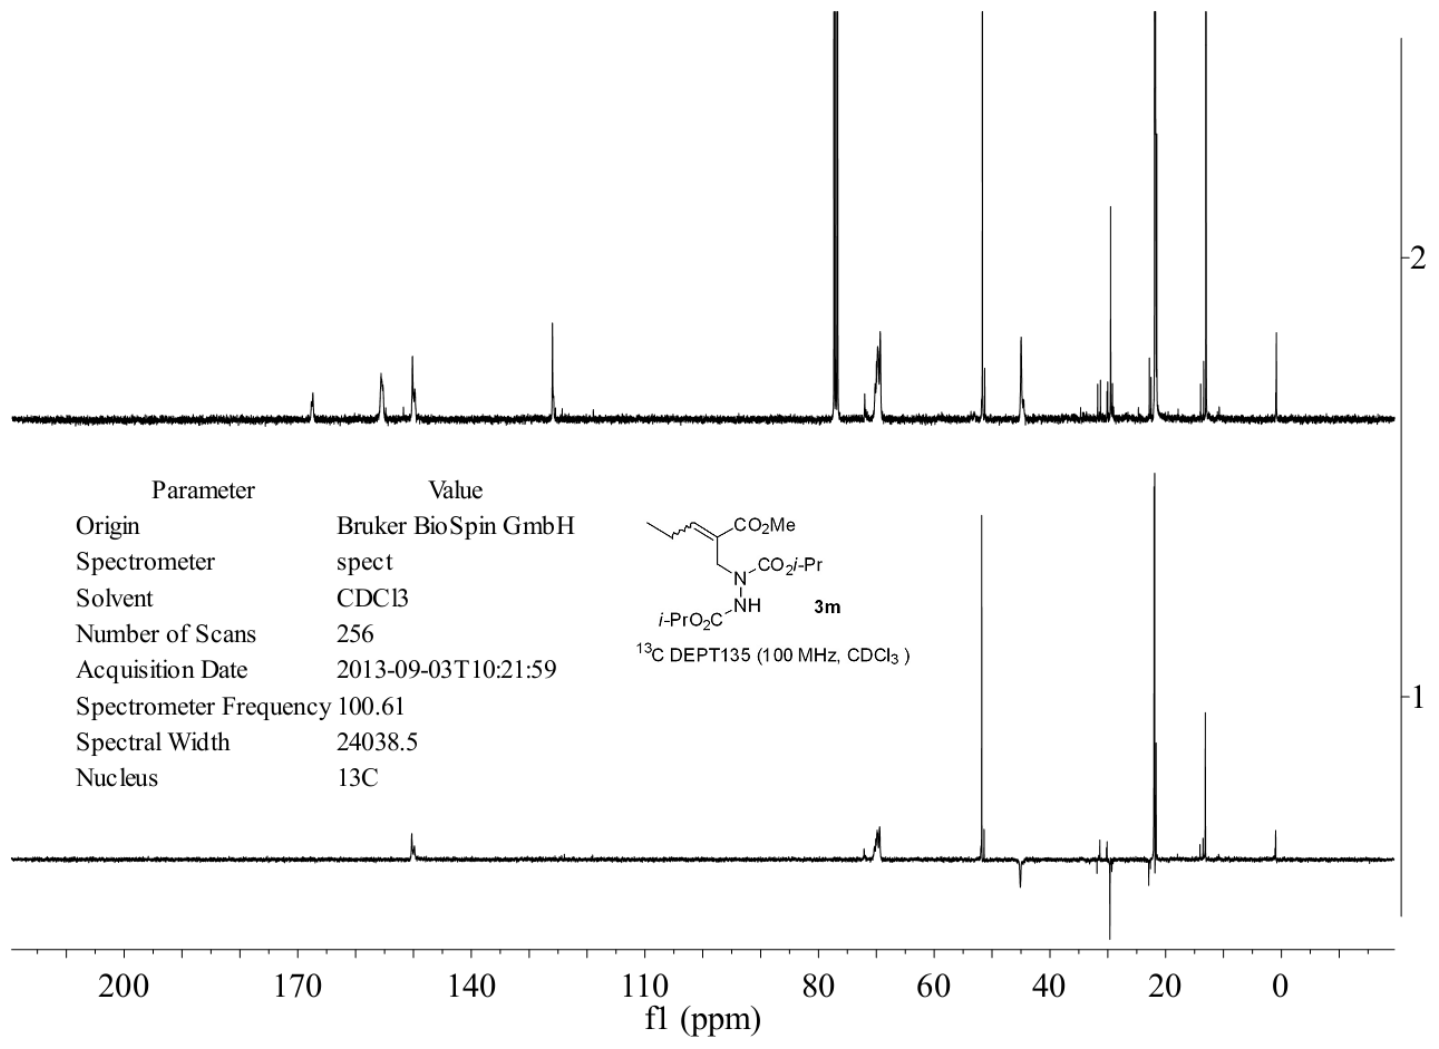



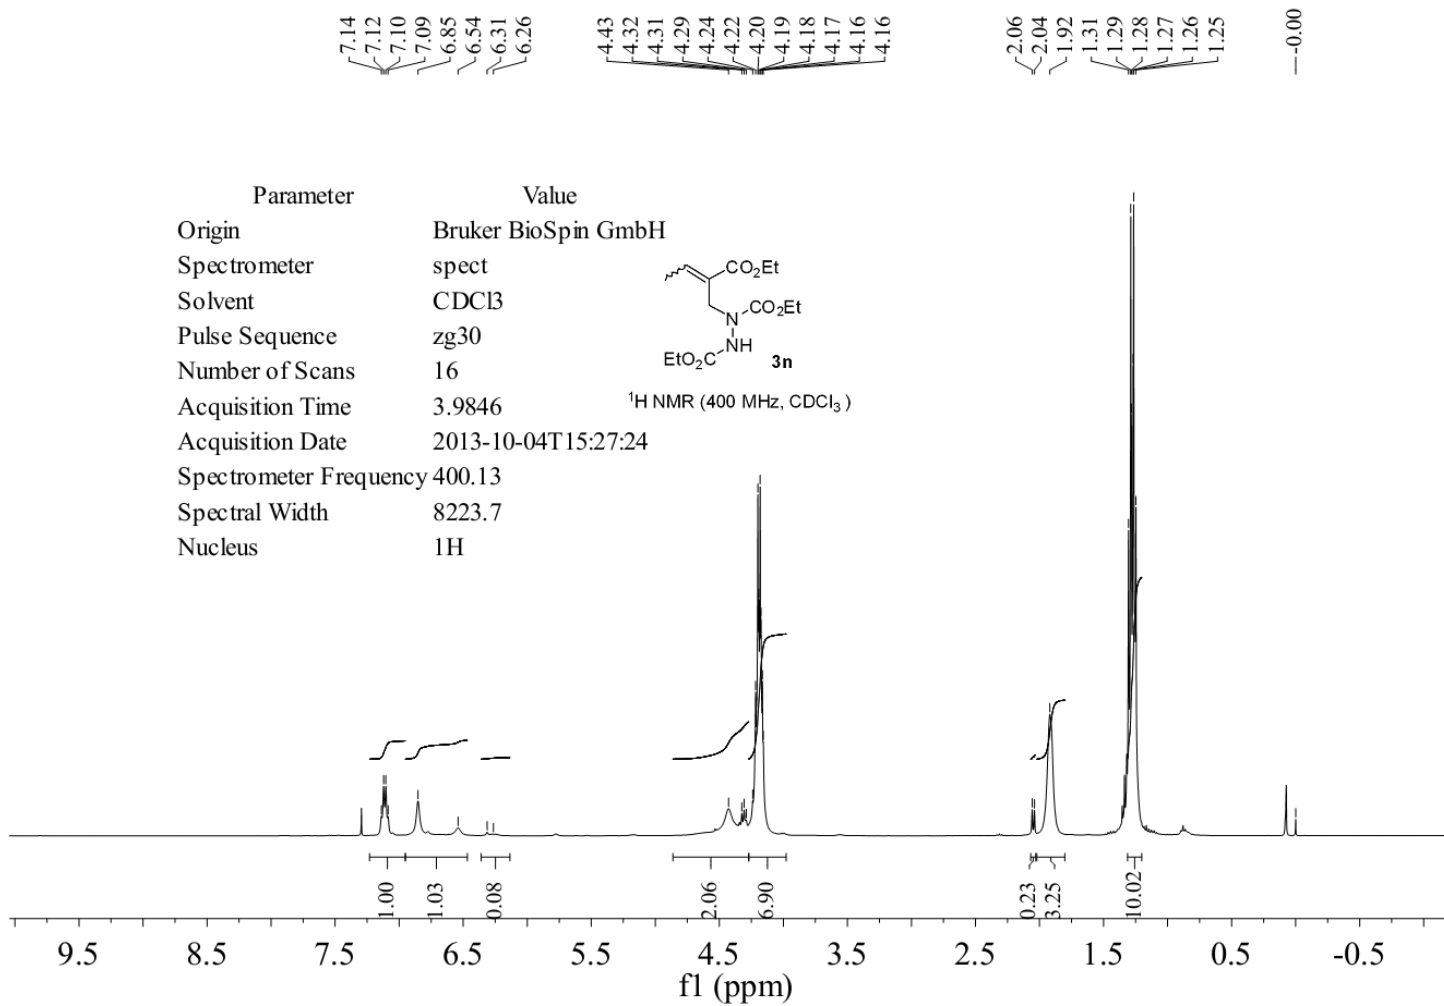

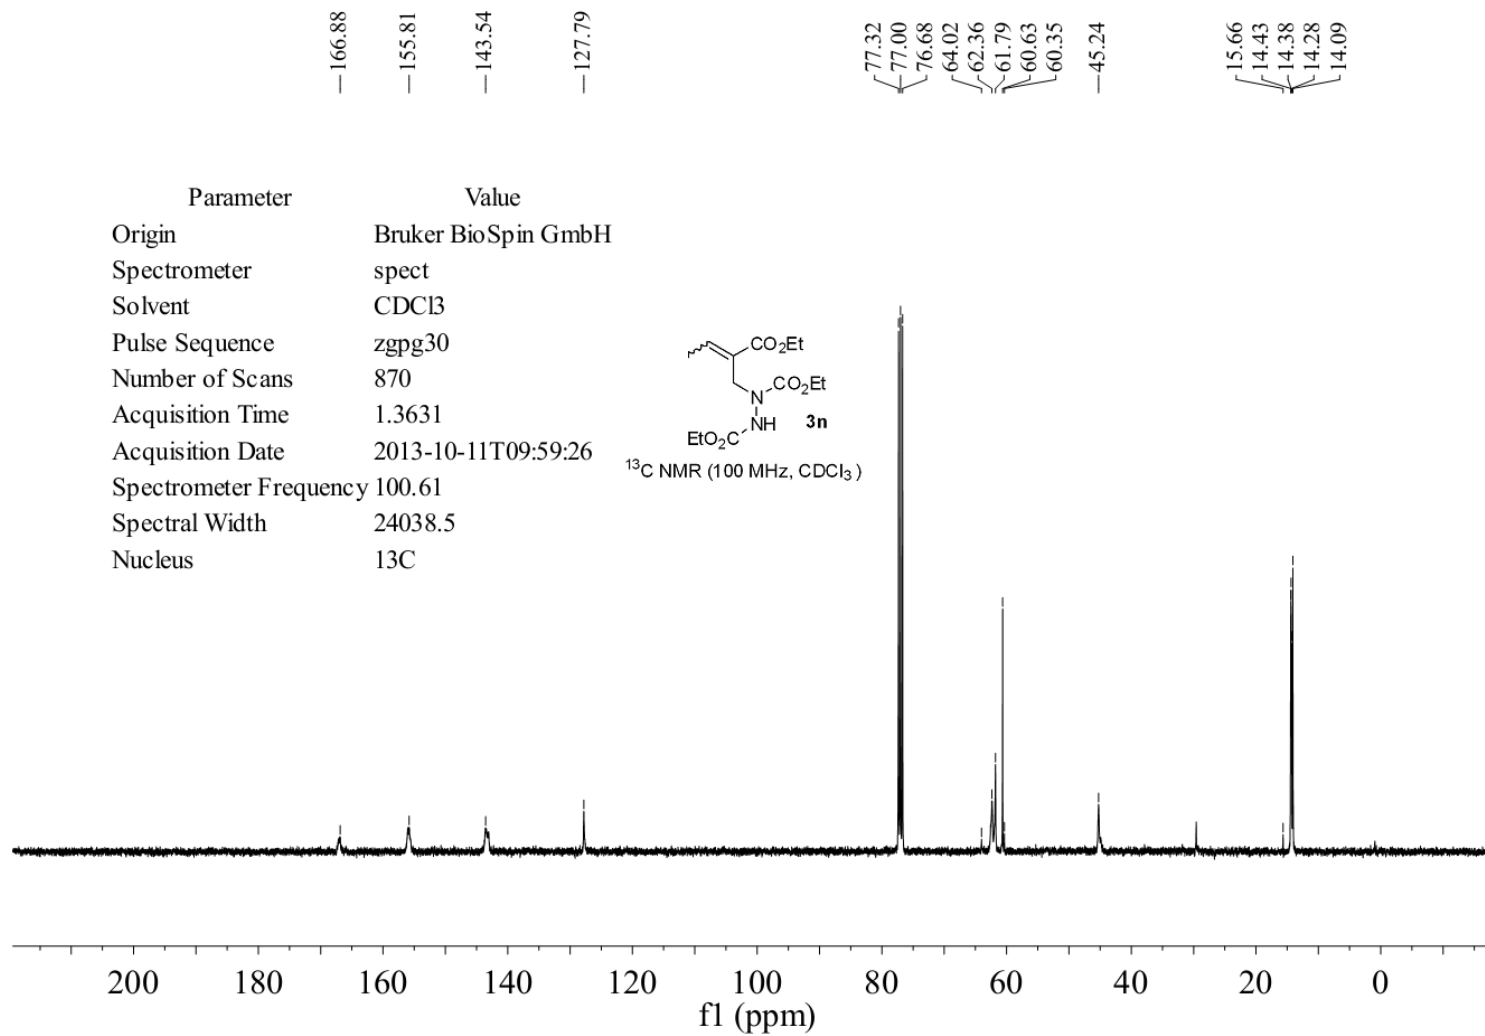

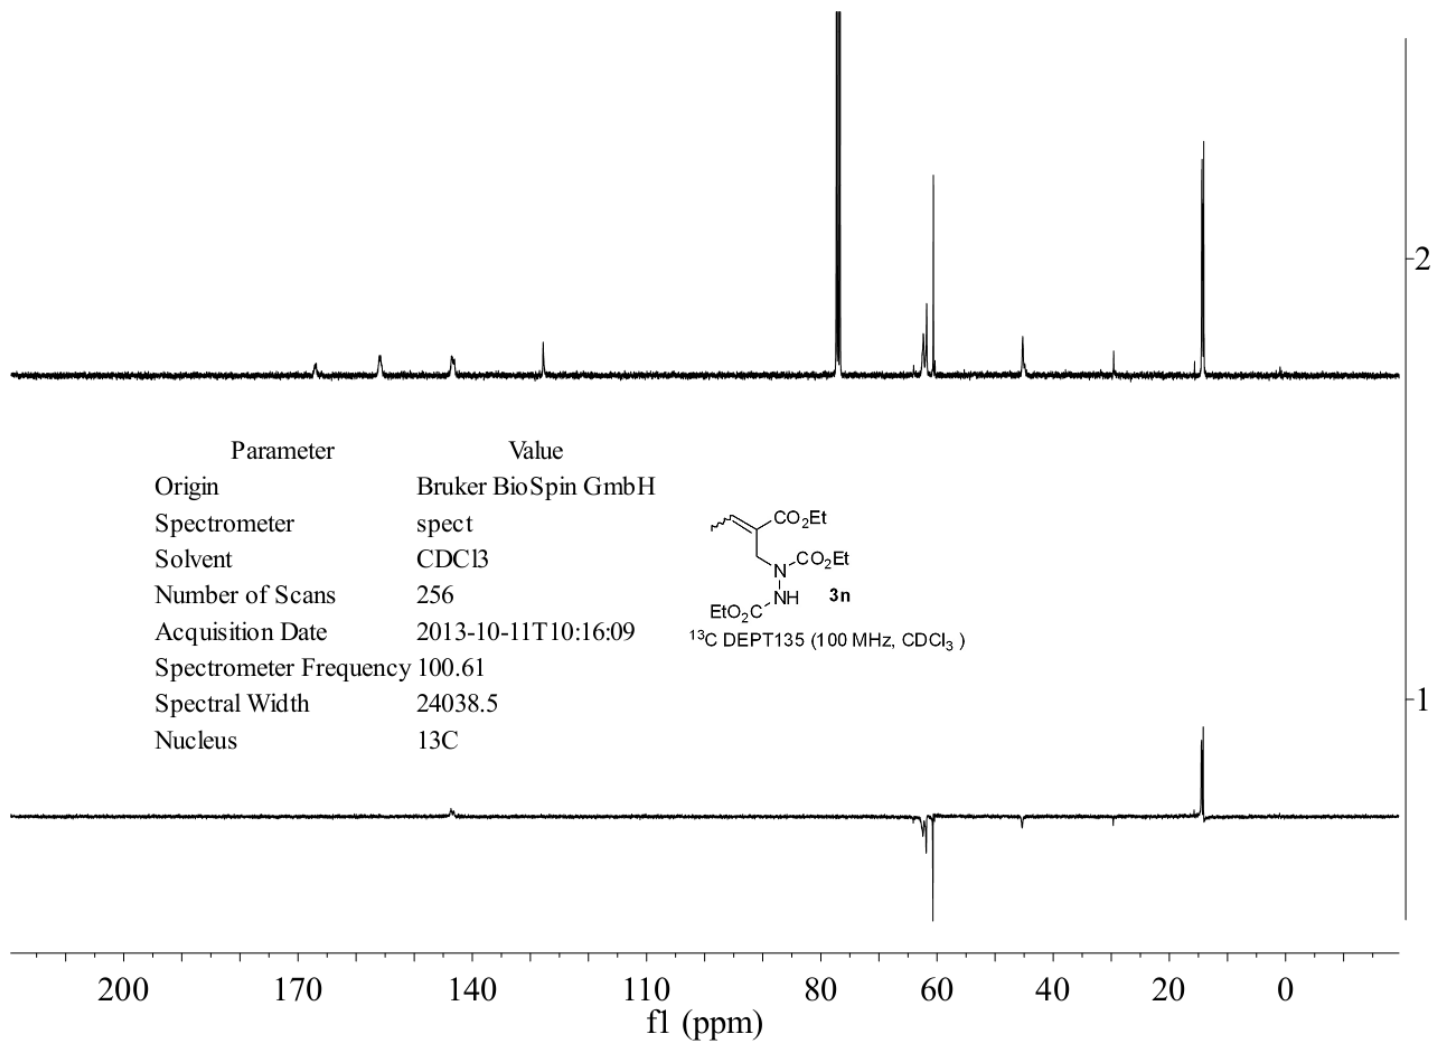

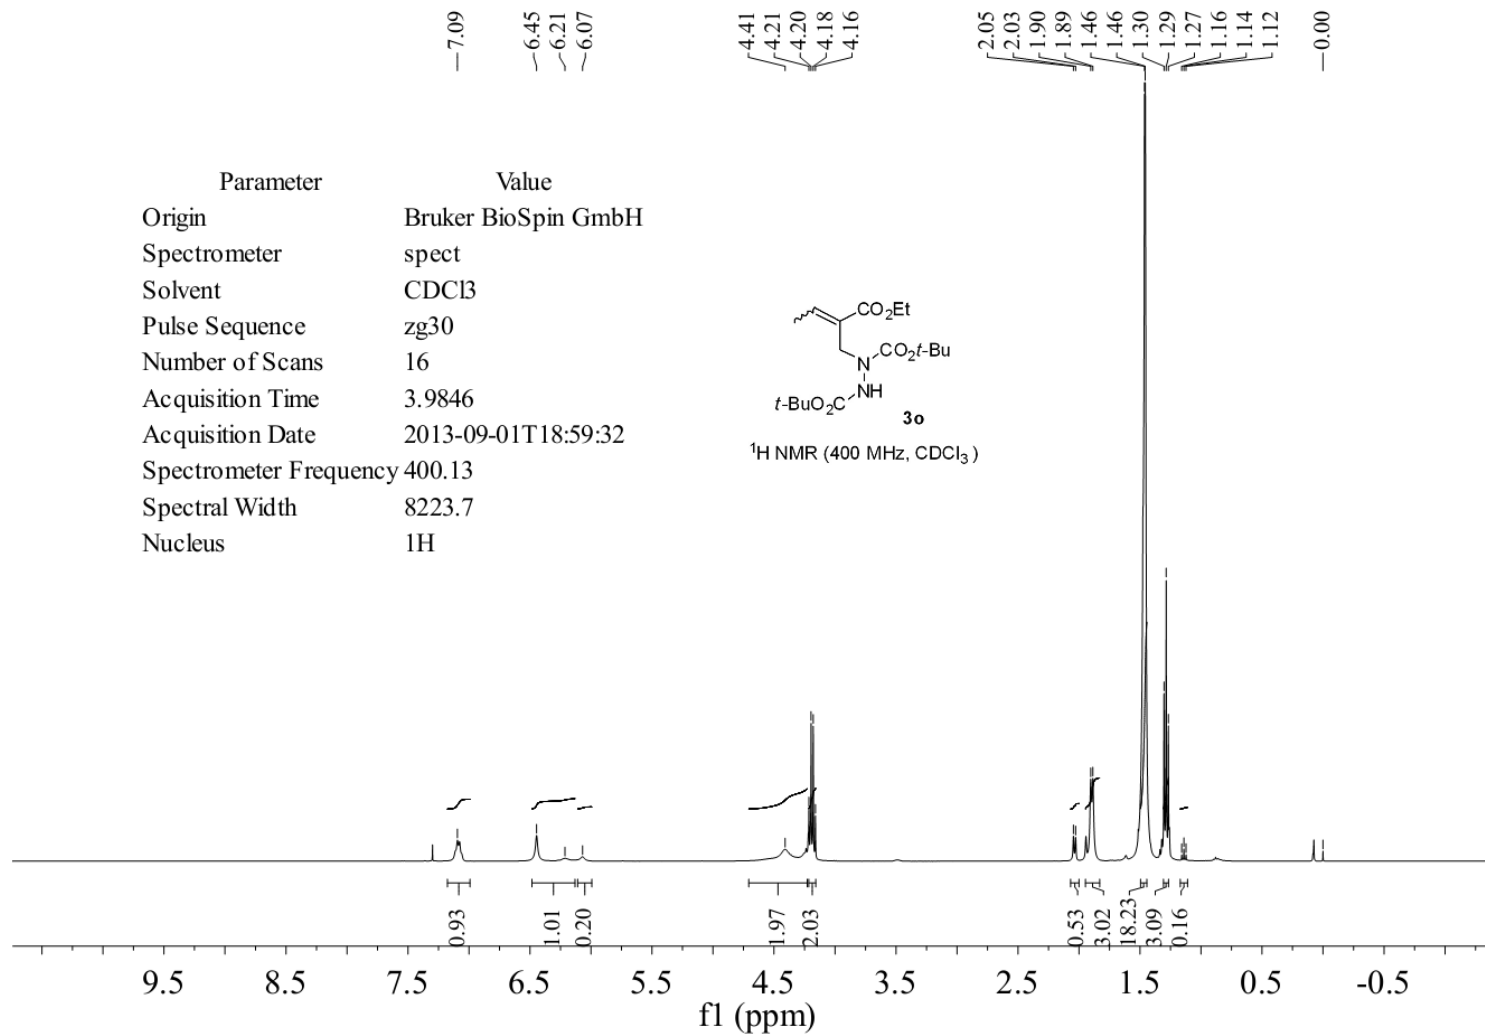

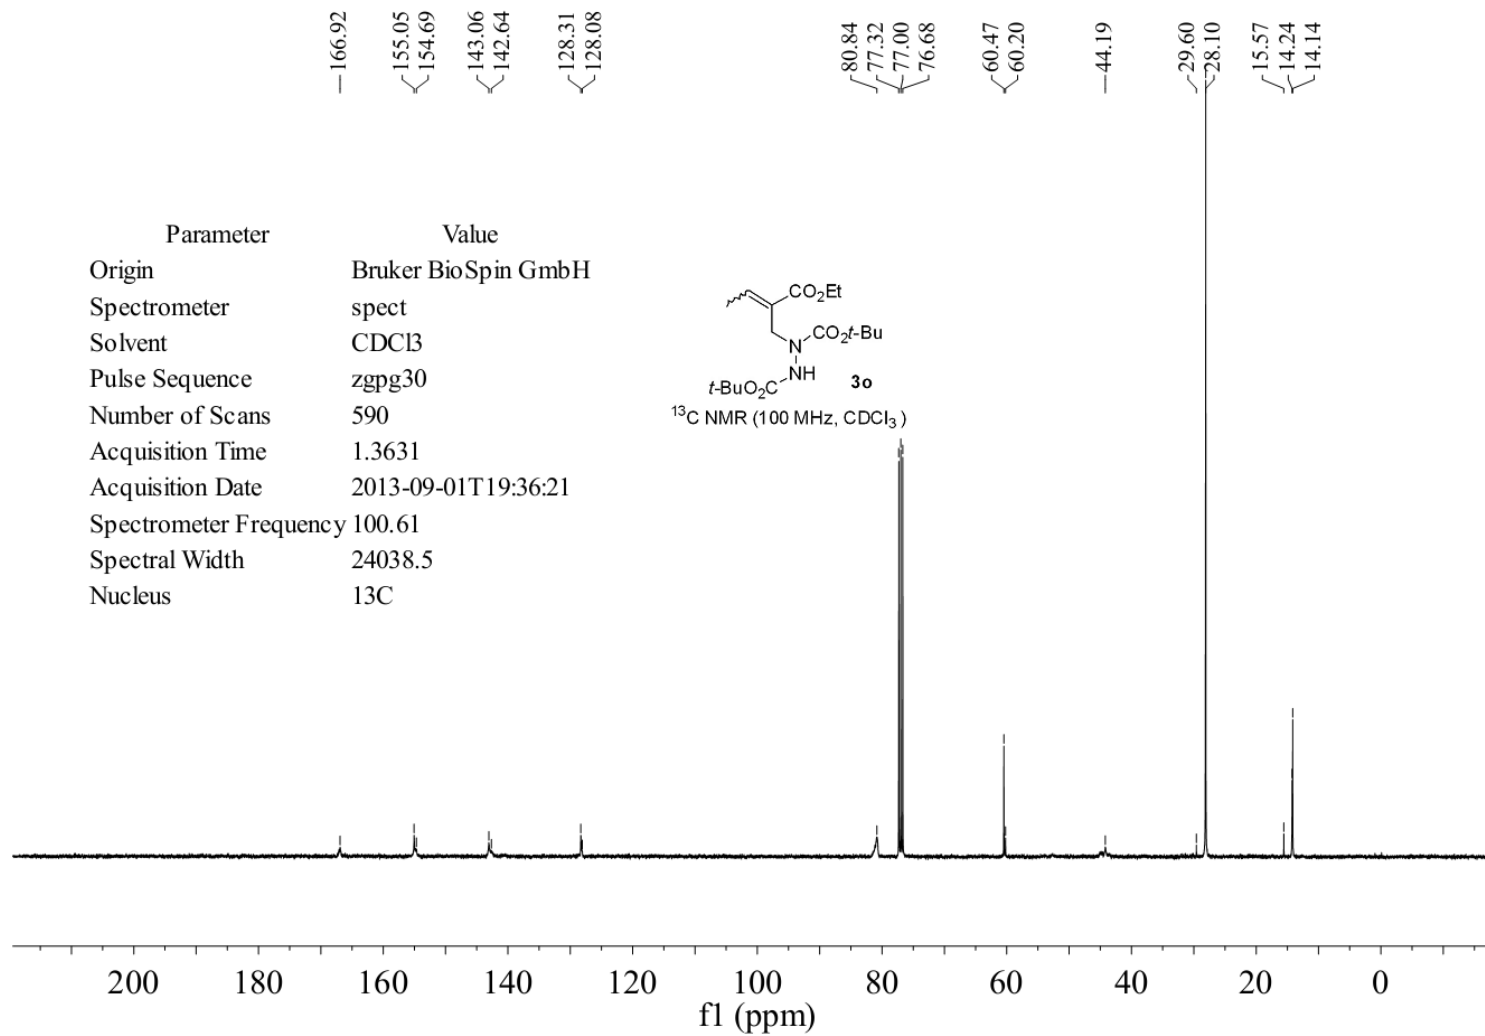

| Parameter              | Value               |
|------------------------|---------------------|
| Origin                 | Bruker BioSpin GmbH |
| Spectrometer           | spect               |
| Solvent                | CDCl <sub>3</sub>   |
| Pulse Sequence         | zgpg30              |
| Number of Scans        | 590                 |
| Acquisition Time       | 1.3631              |
| Acquisition Date       | 2013-09-01T19:36:21 |
| Spectrometer Frequency | 100.61              |
| Spectral Width         | 24038.5             |
| Nucleus                | <sup>13</sup> C     |

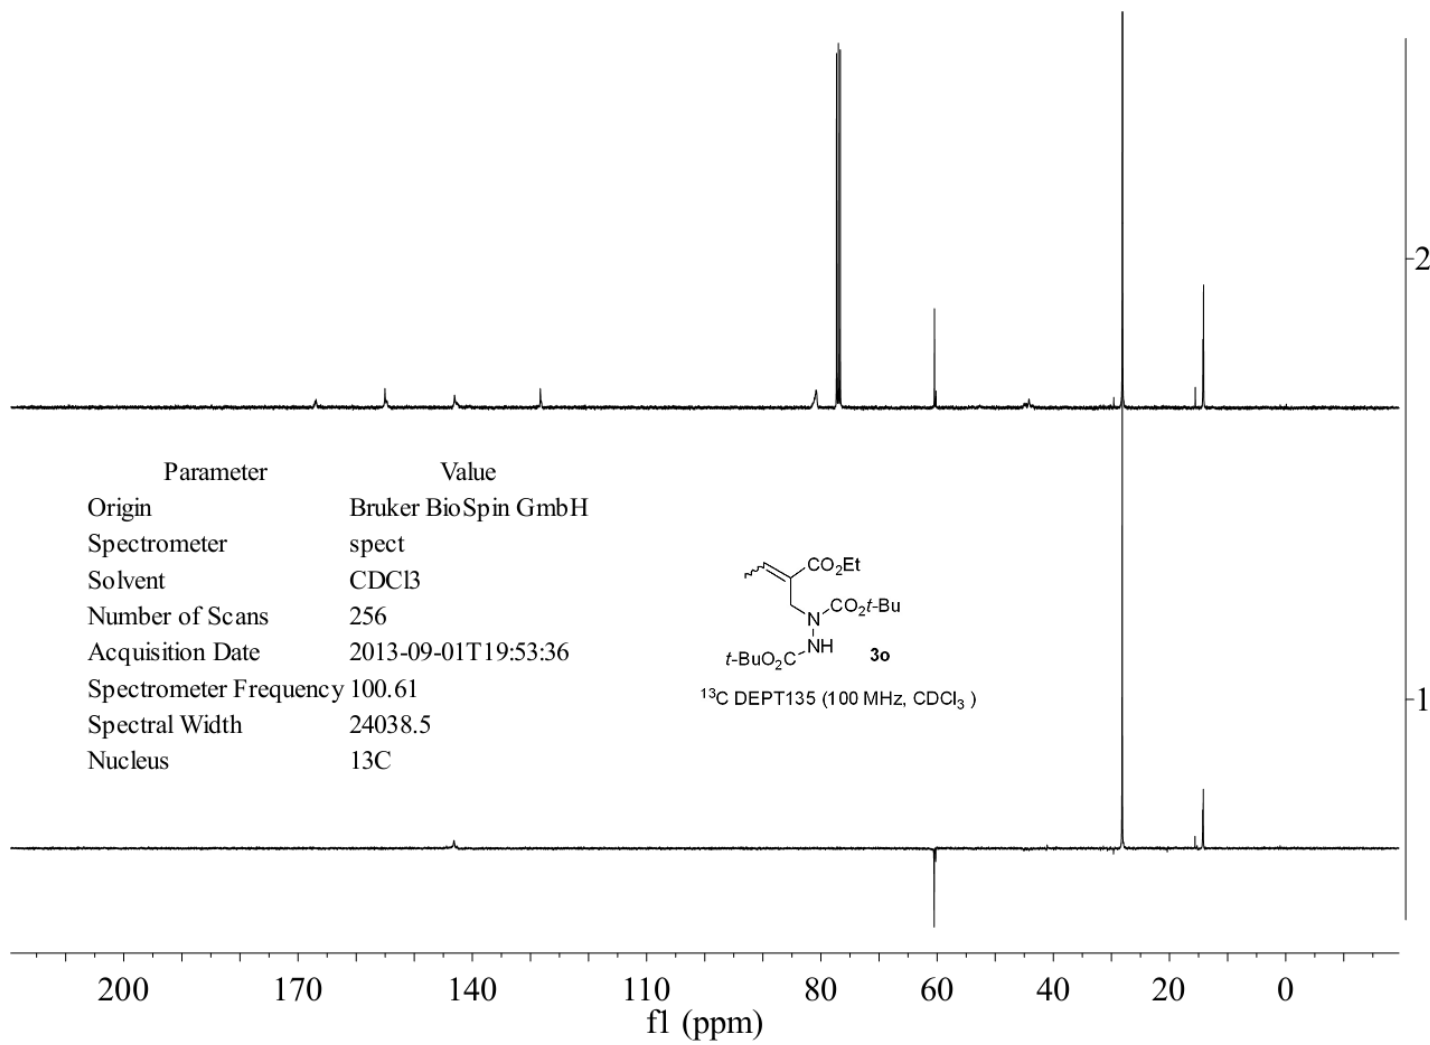

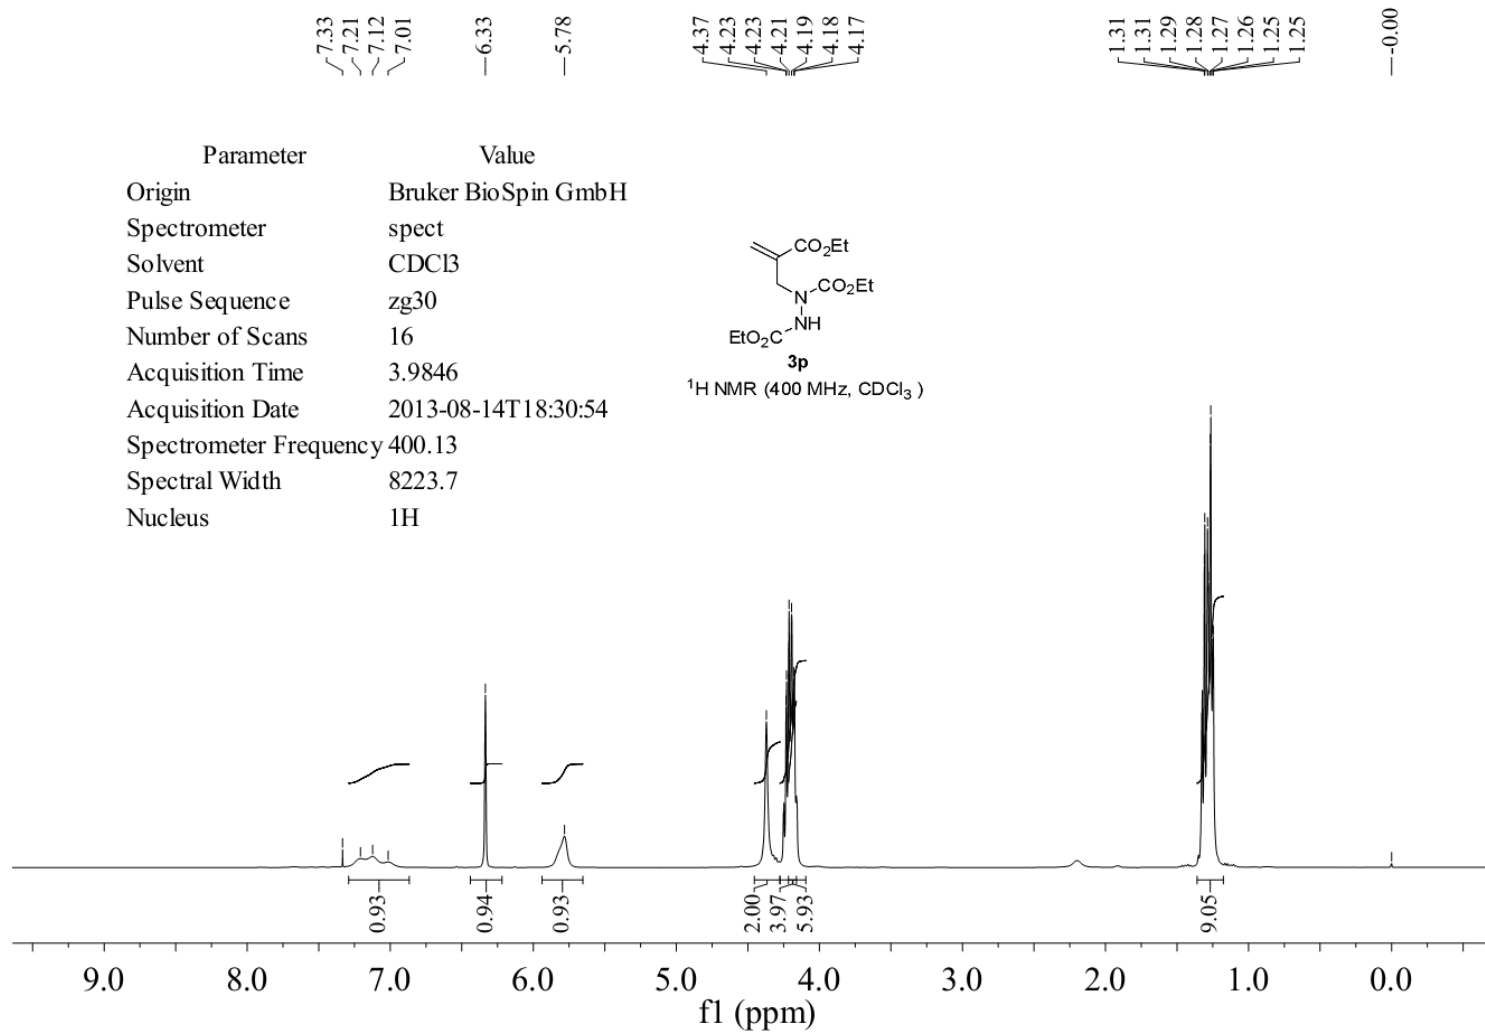

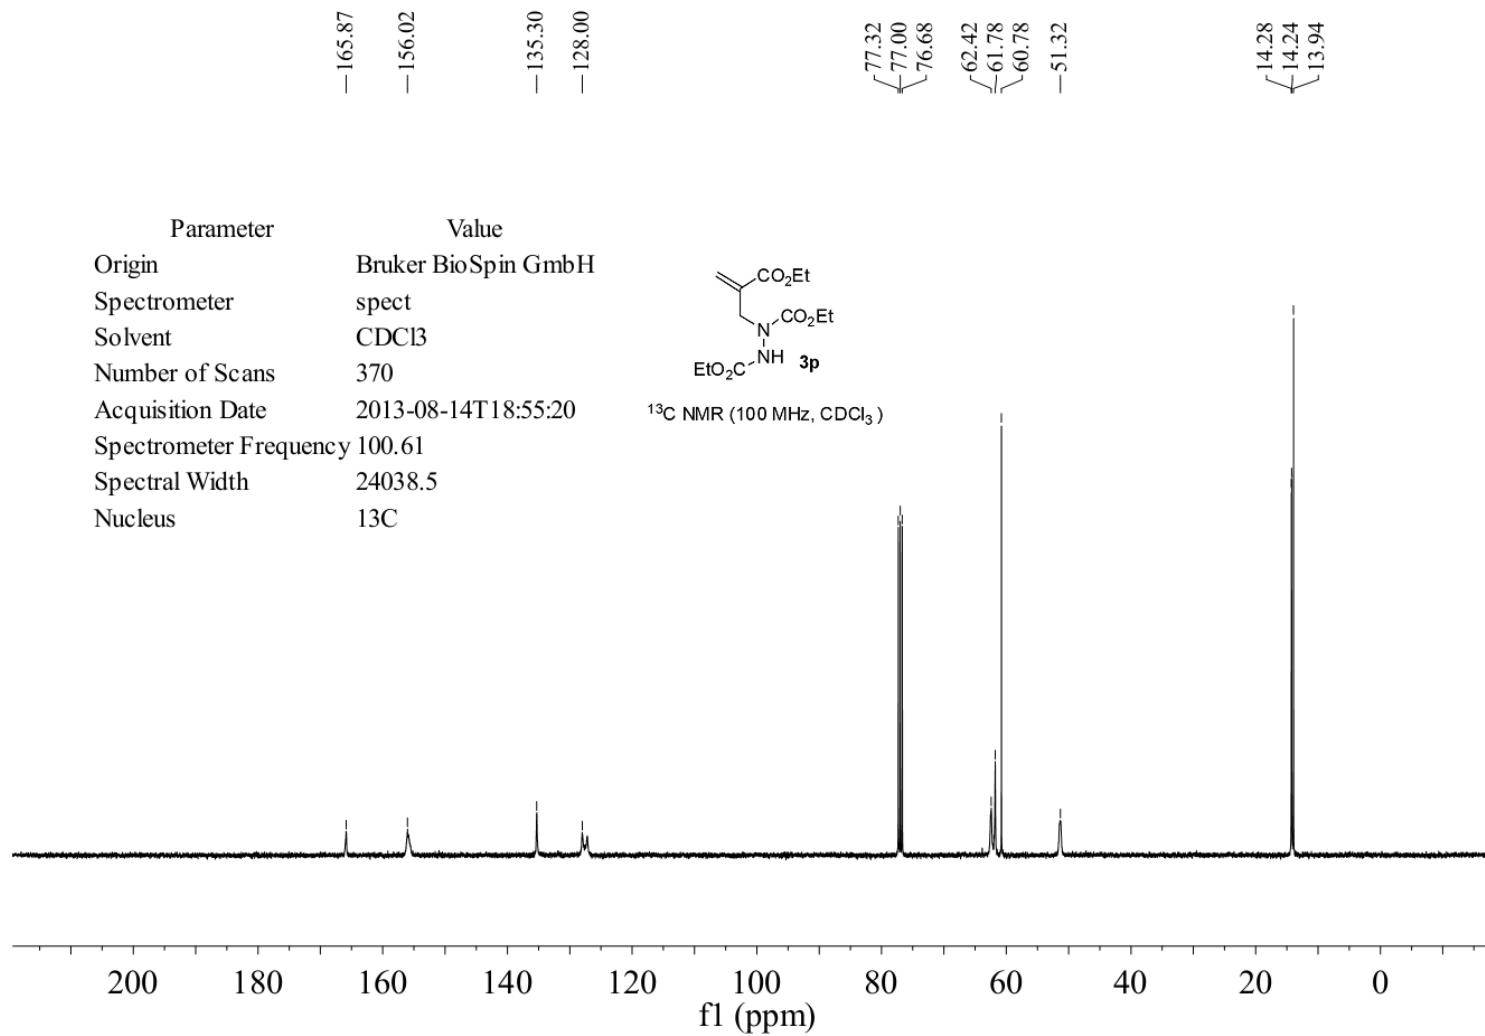



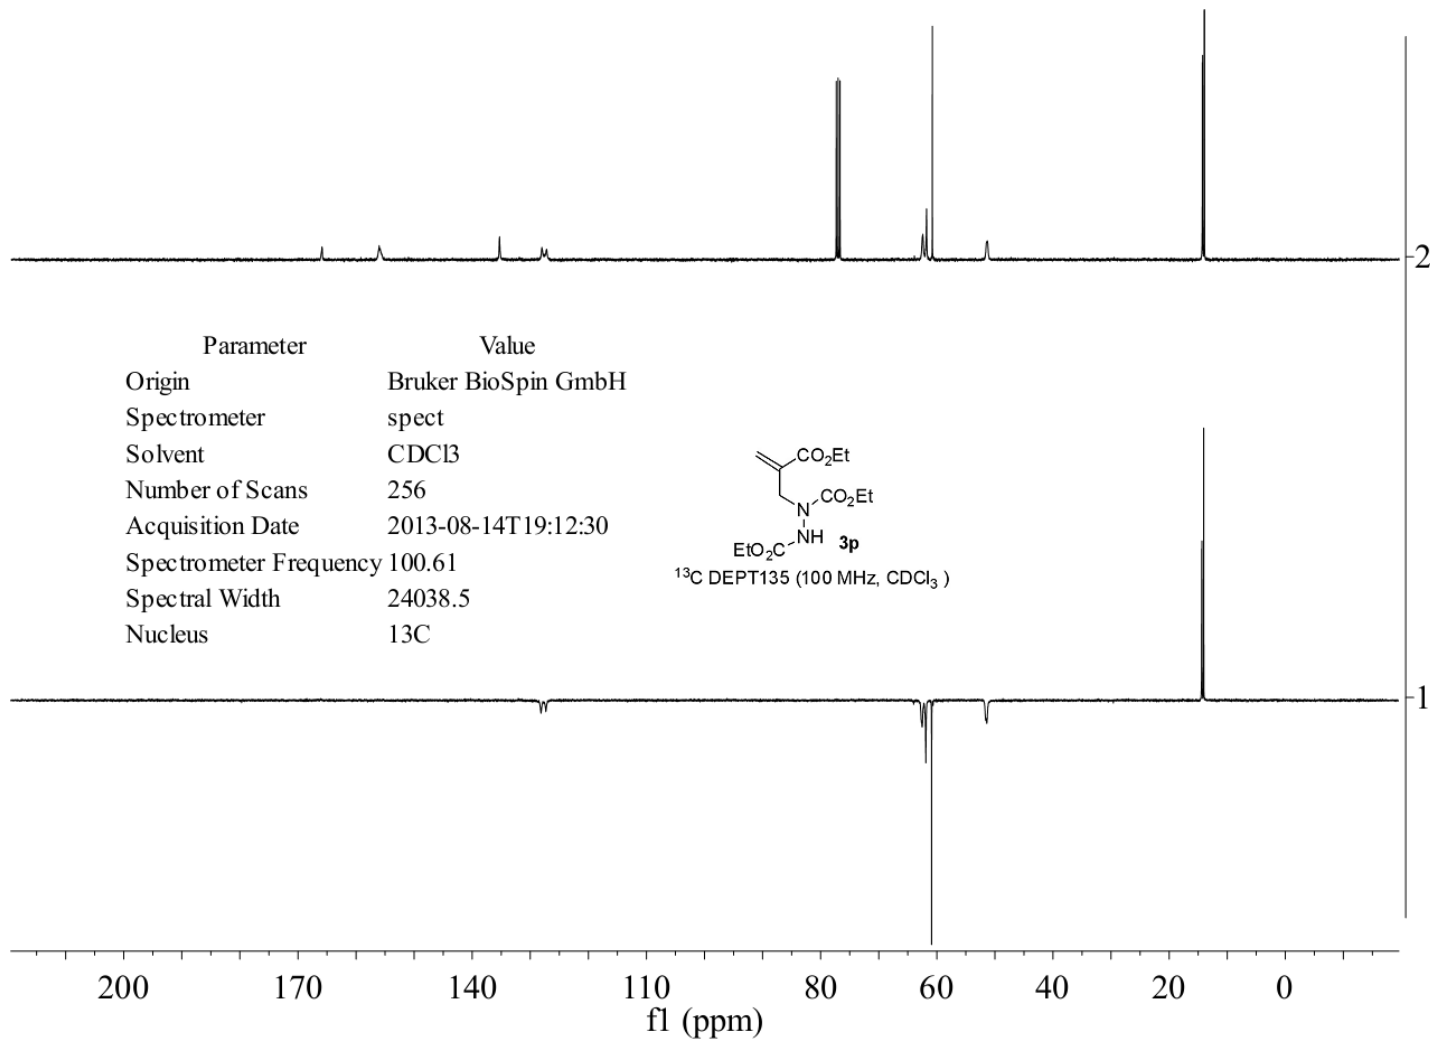

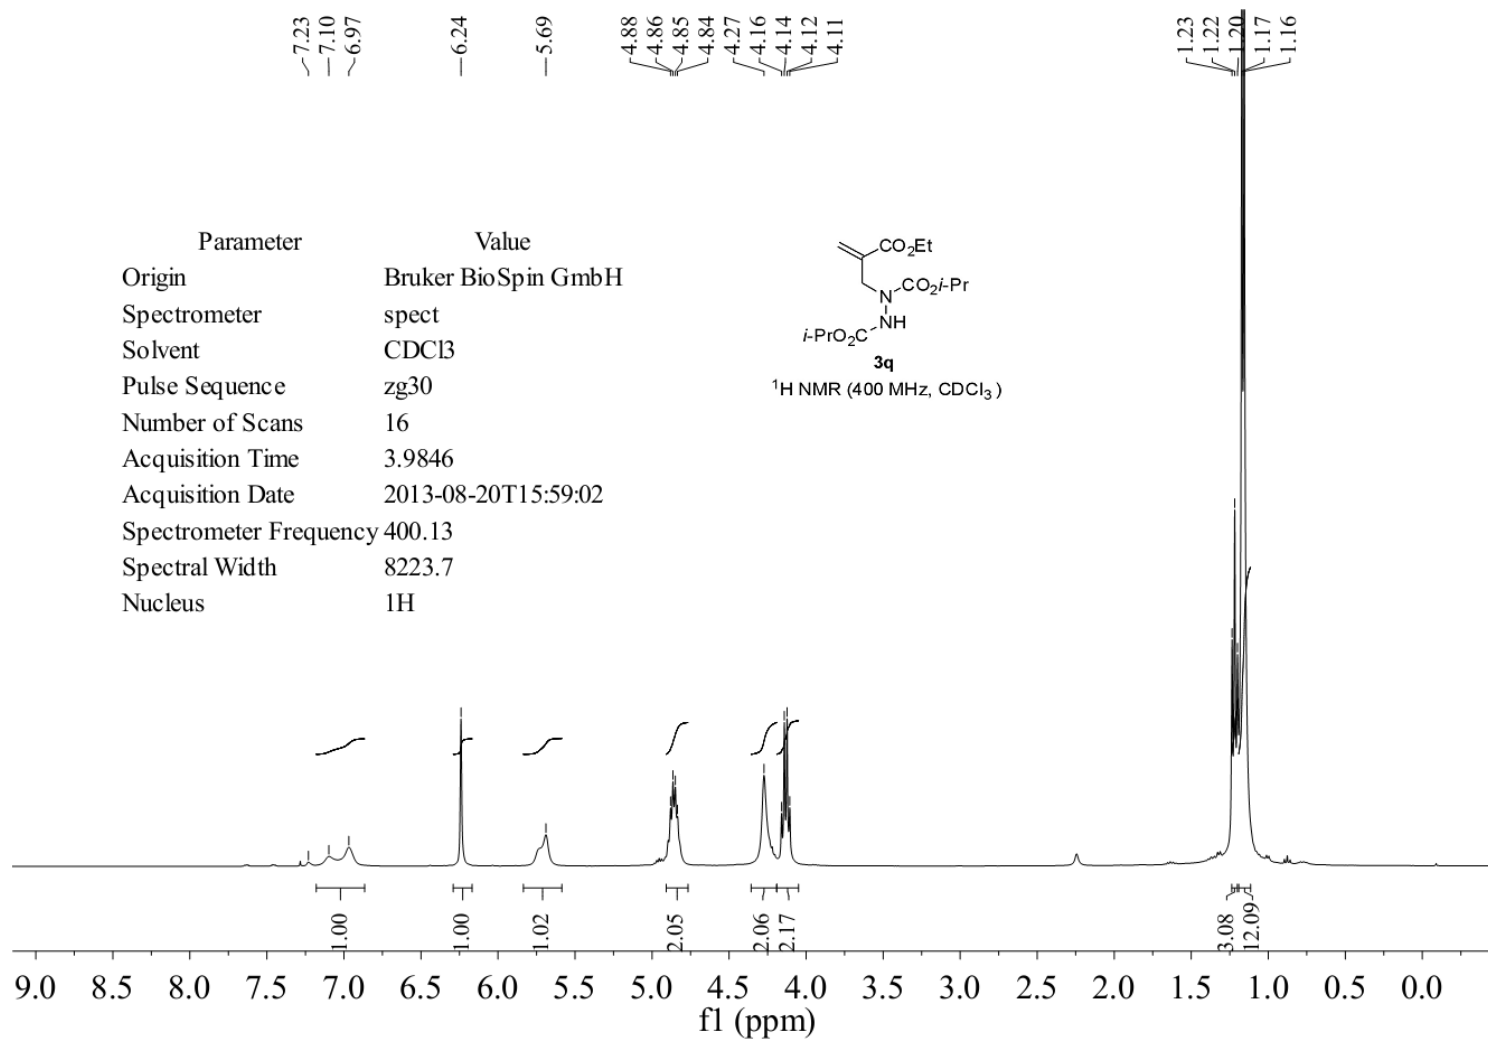

| Parameter              | Value               |
|------------------------|---------------------|
| Origin                 | Bruker BioSpin GmbH |
| Spectrometer           | spect               |
| Solvent                | CDCl <sub>3</sub>   |
| Pulse Sequence         | zg30                |
| Number of Scans        | 16                  |
| Acquisition Time       | 3.9846              |
| Acquisition Date       | 2013-08-20T15:59:02 |
| Spectrometer Frequency | 400.13              |
| Spectral Width         | 8223.7              |
| Nucleus                | <sup>1</sup> H      |

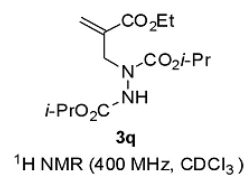

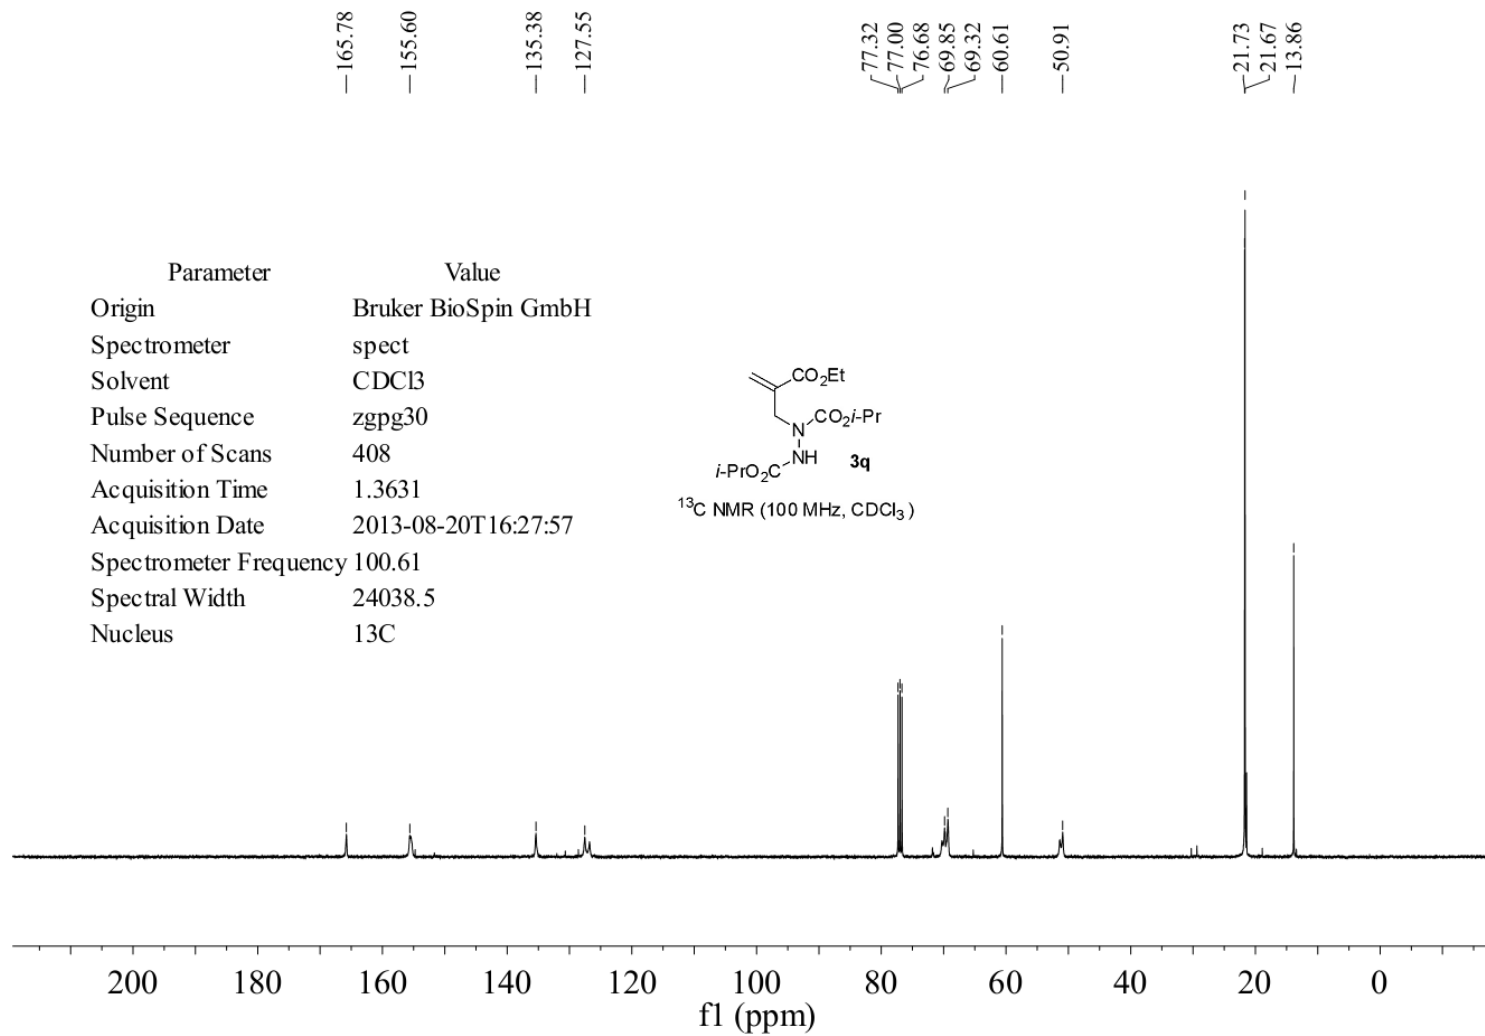

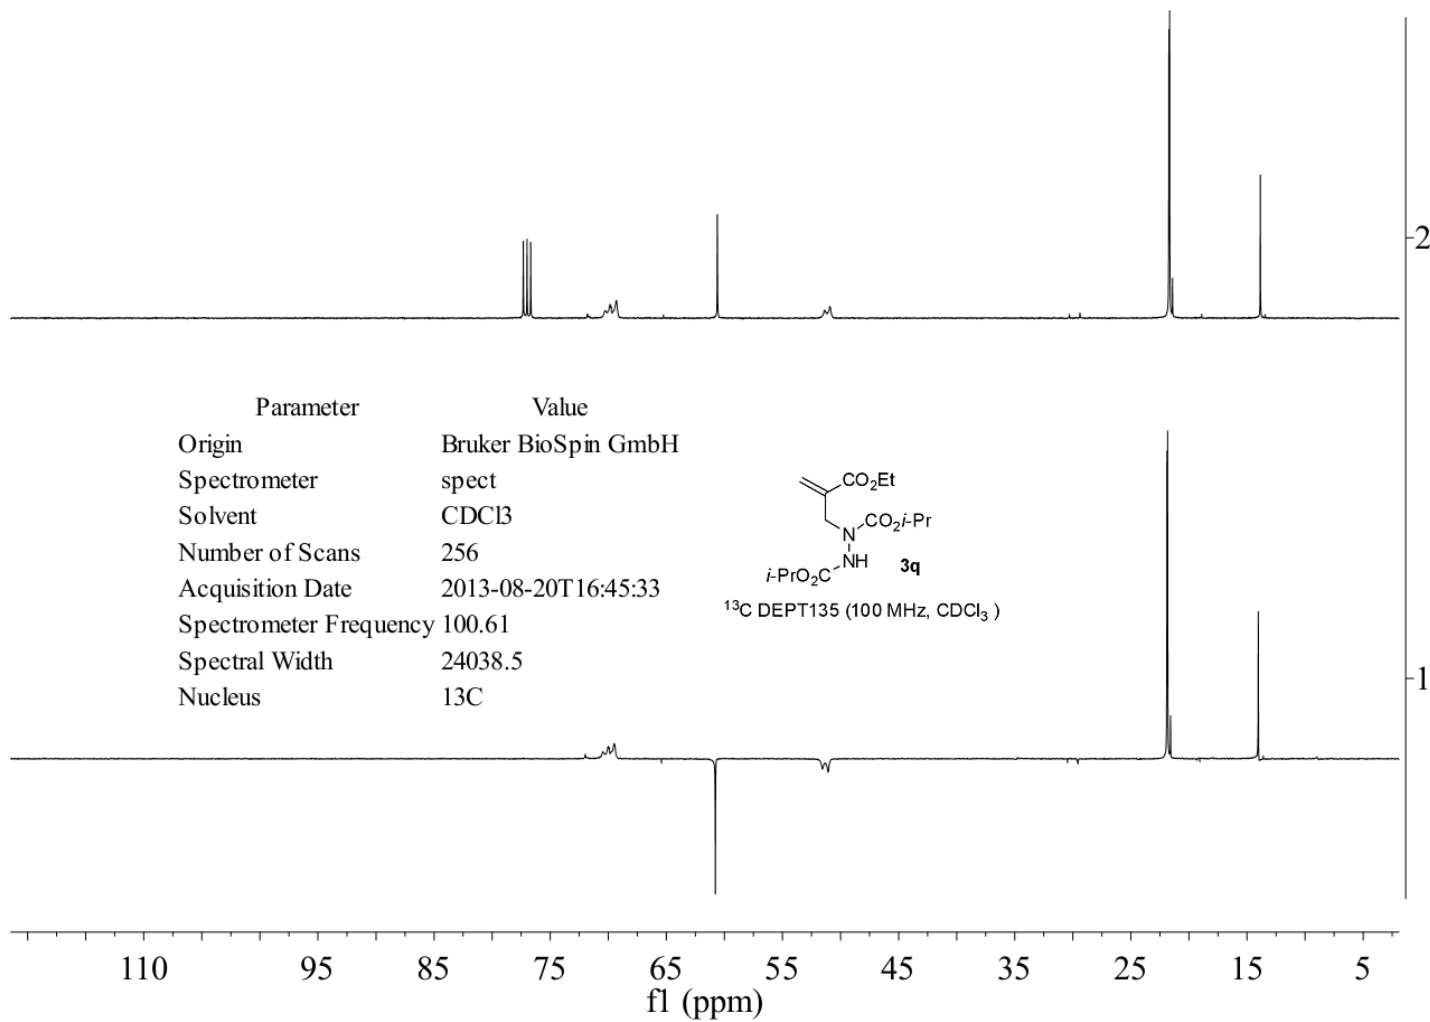

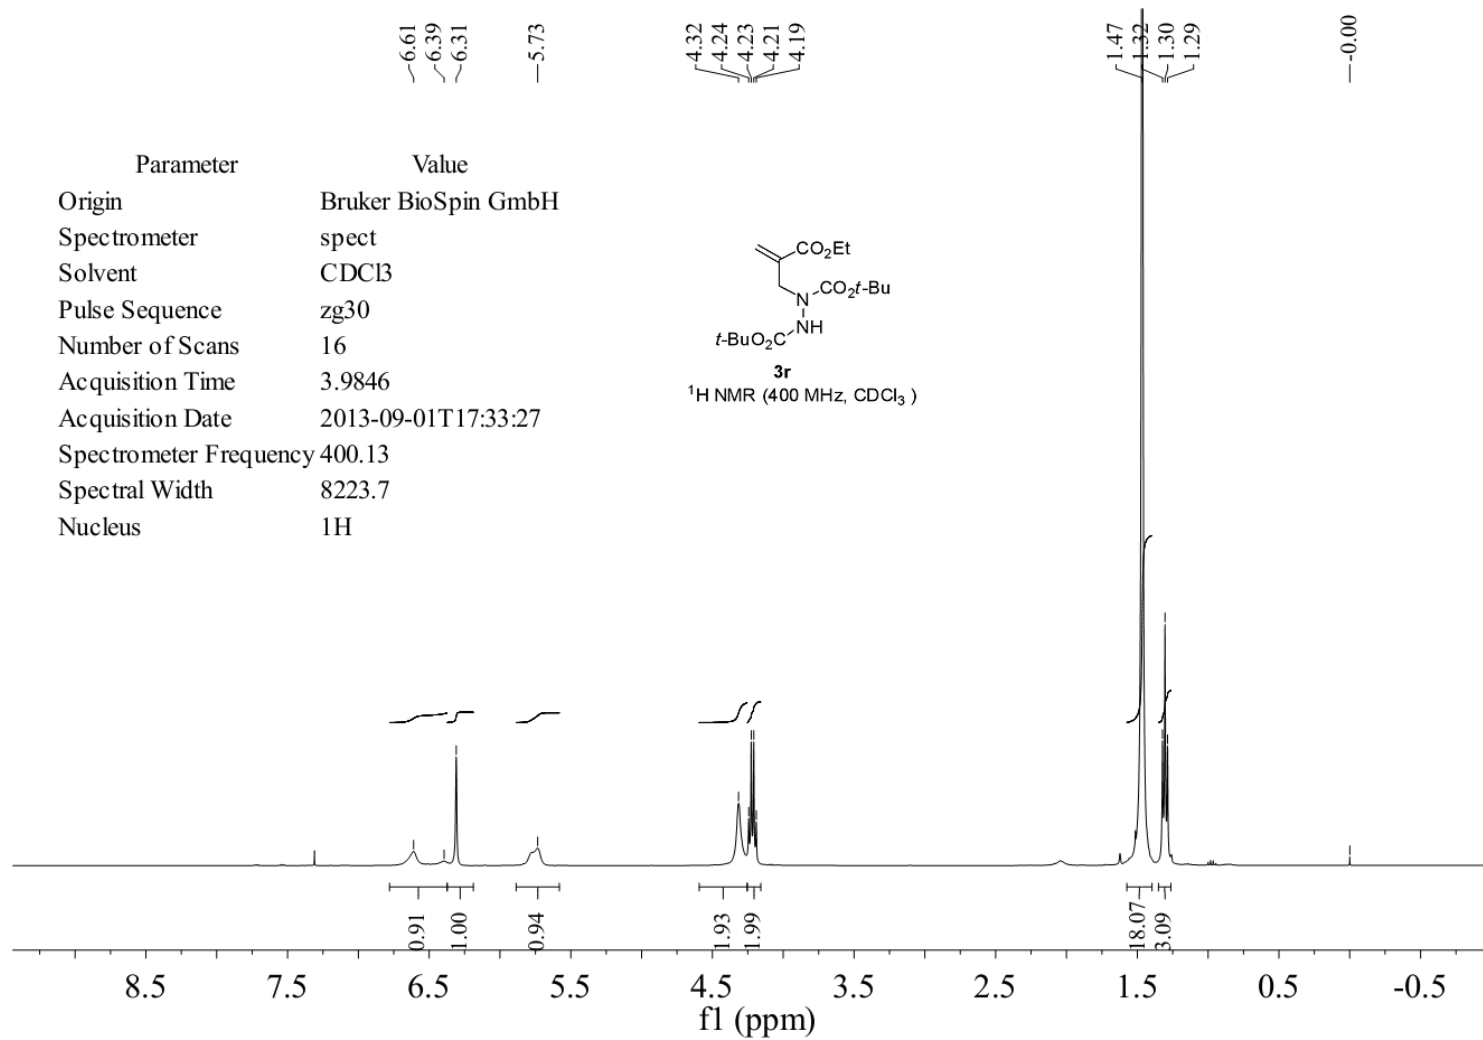

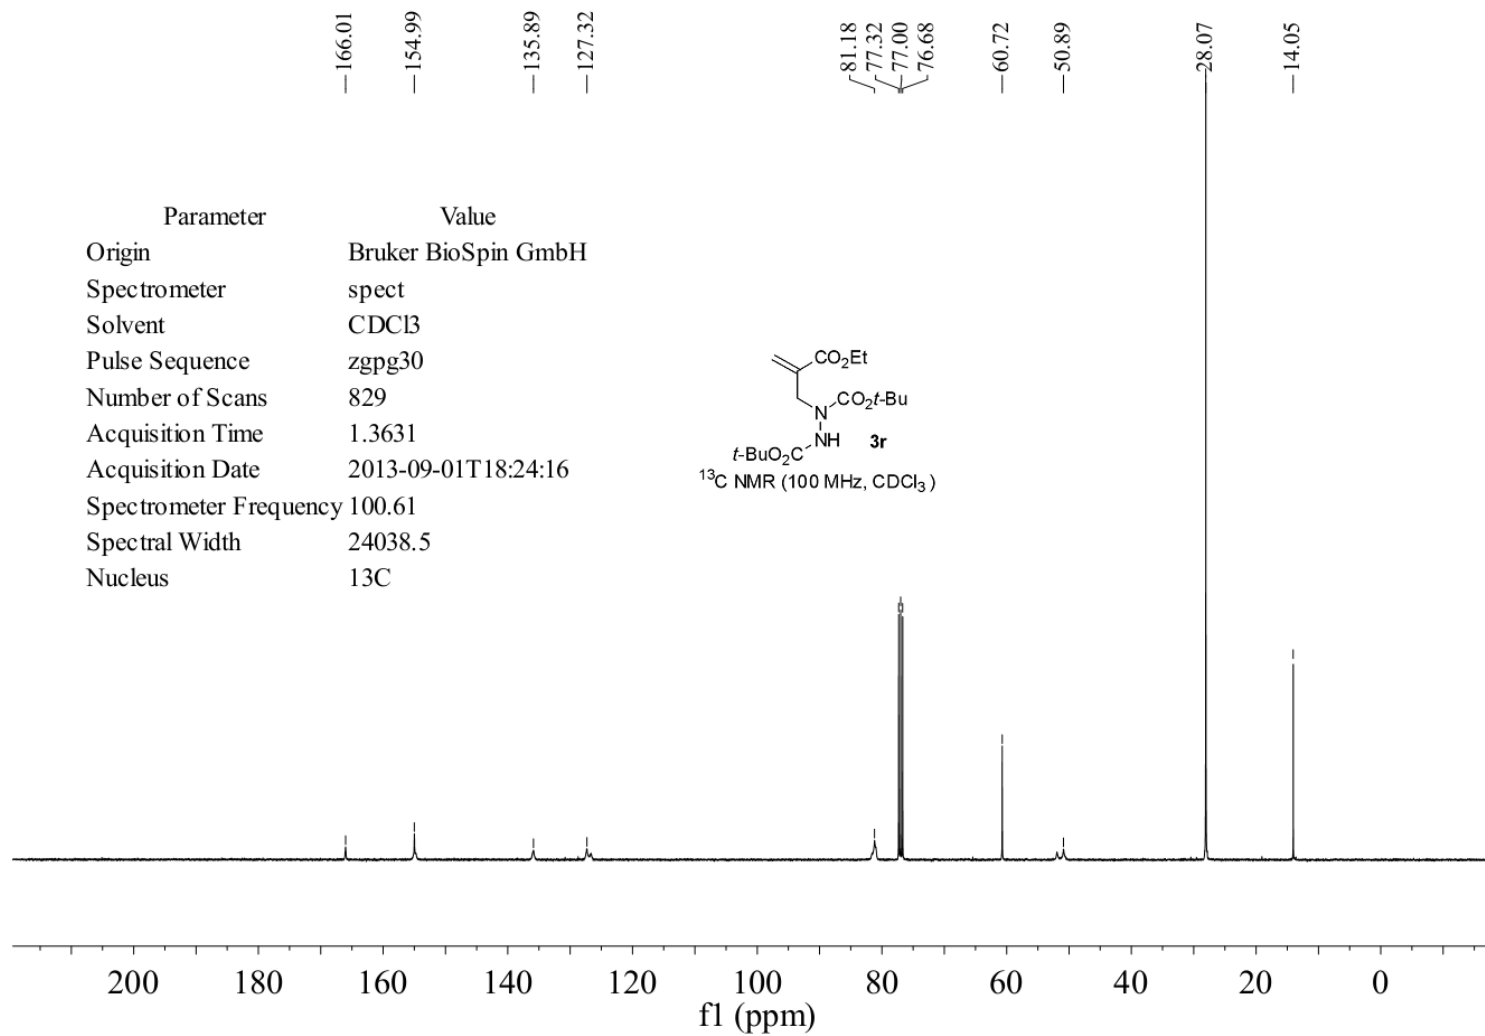

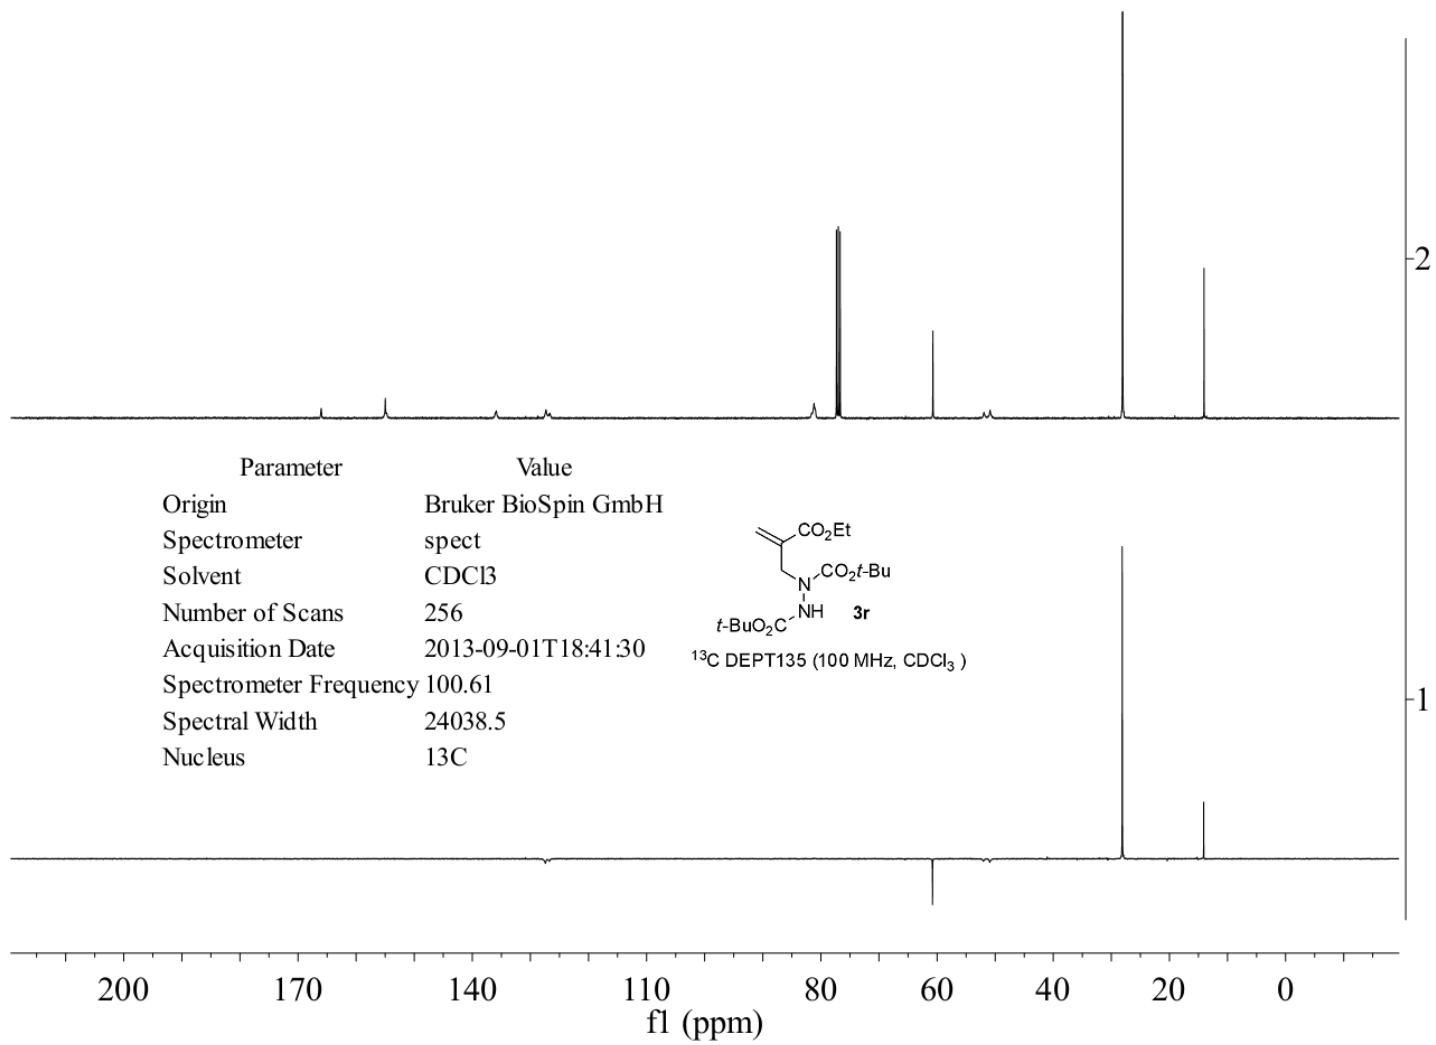

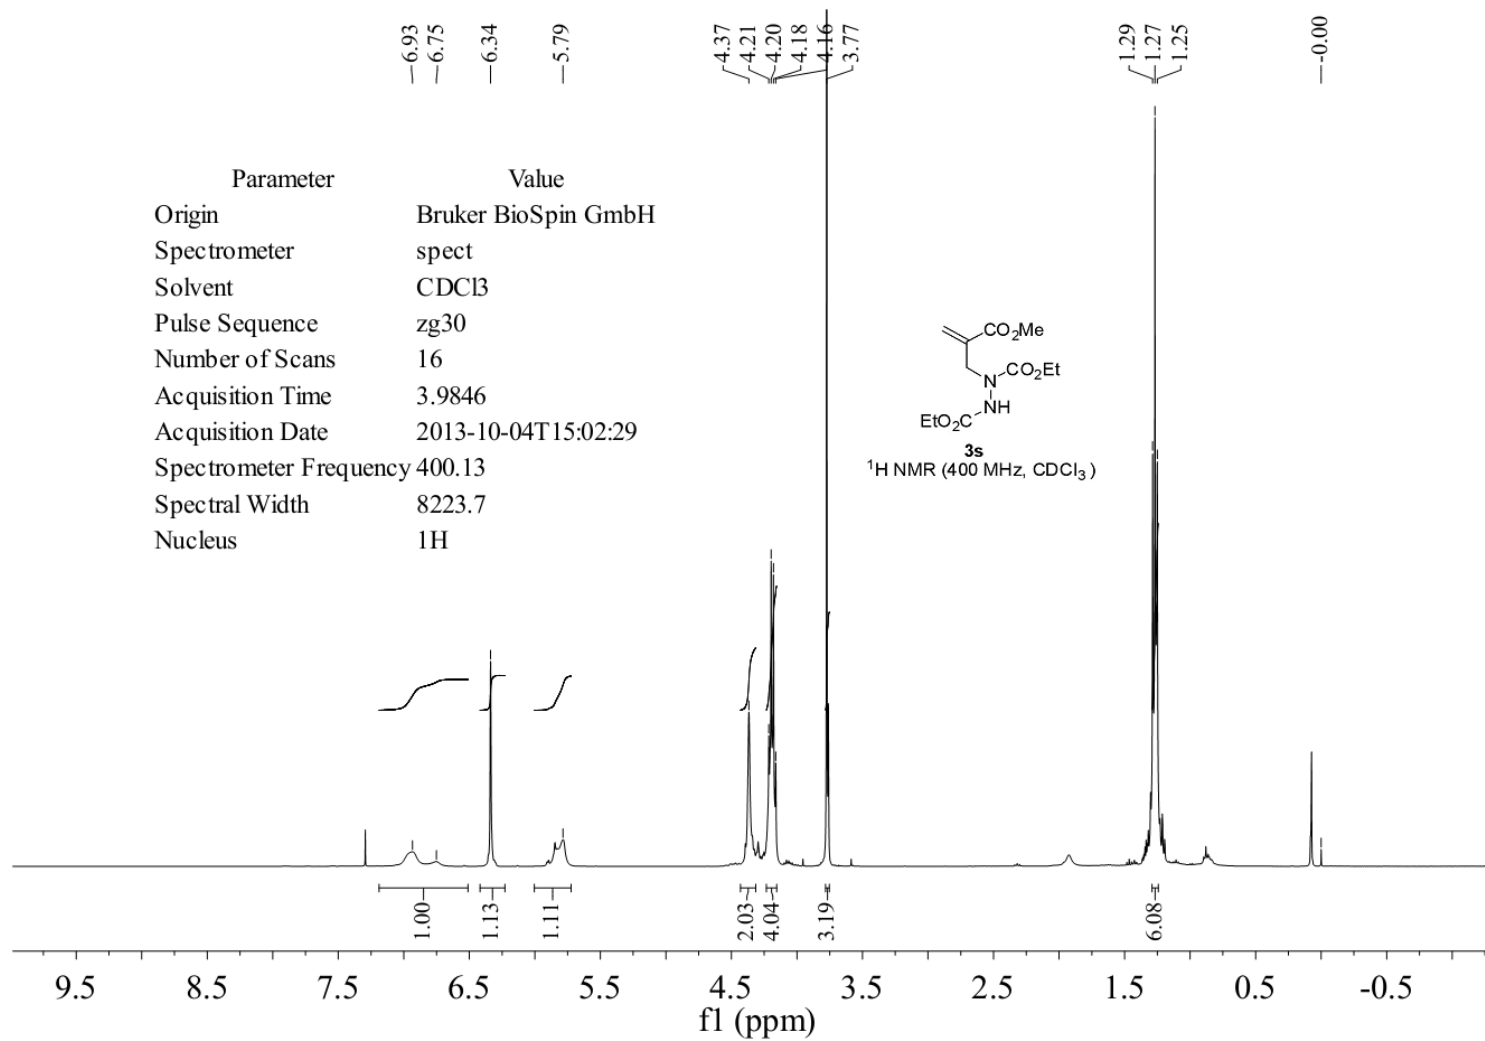



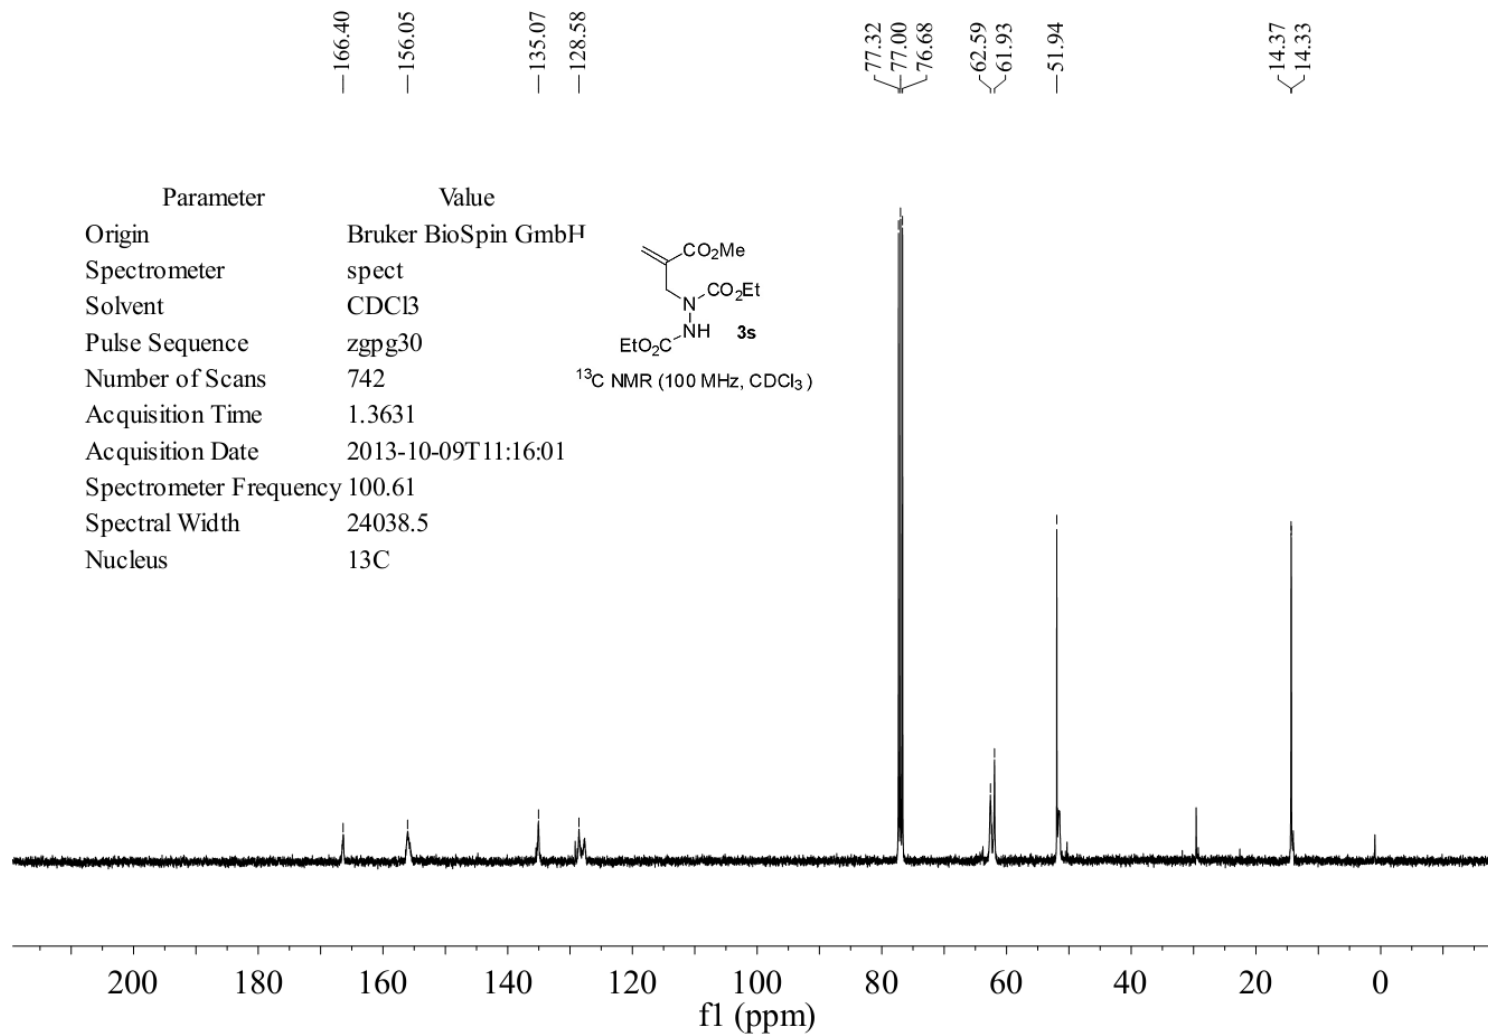

| Parameter              | Value               |
|------------------------|---------------------|
| Origin                 | Bruker BioSpin GmbH |
| Spectrometer           | spect               |
| Solvent                | CDCl <sub>3</sub>   |
| Pulse Sequence         | zgpg30              |
| Number of Scans        | 742                 |
| Acquisition Time       | 1.3631              |
| Acquisition Date       | 2013-10-09T11:16:01 |
| Spectrometer Frequency | 100.61              |
| Spectral Width         | 24038.5             |
| Nucleus                | <sup>13</sup> C     |

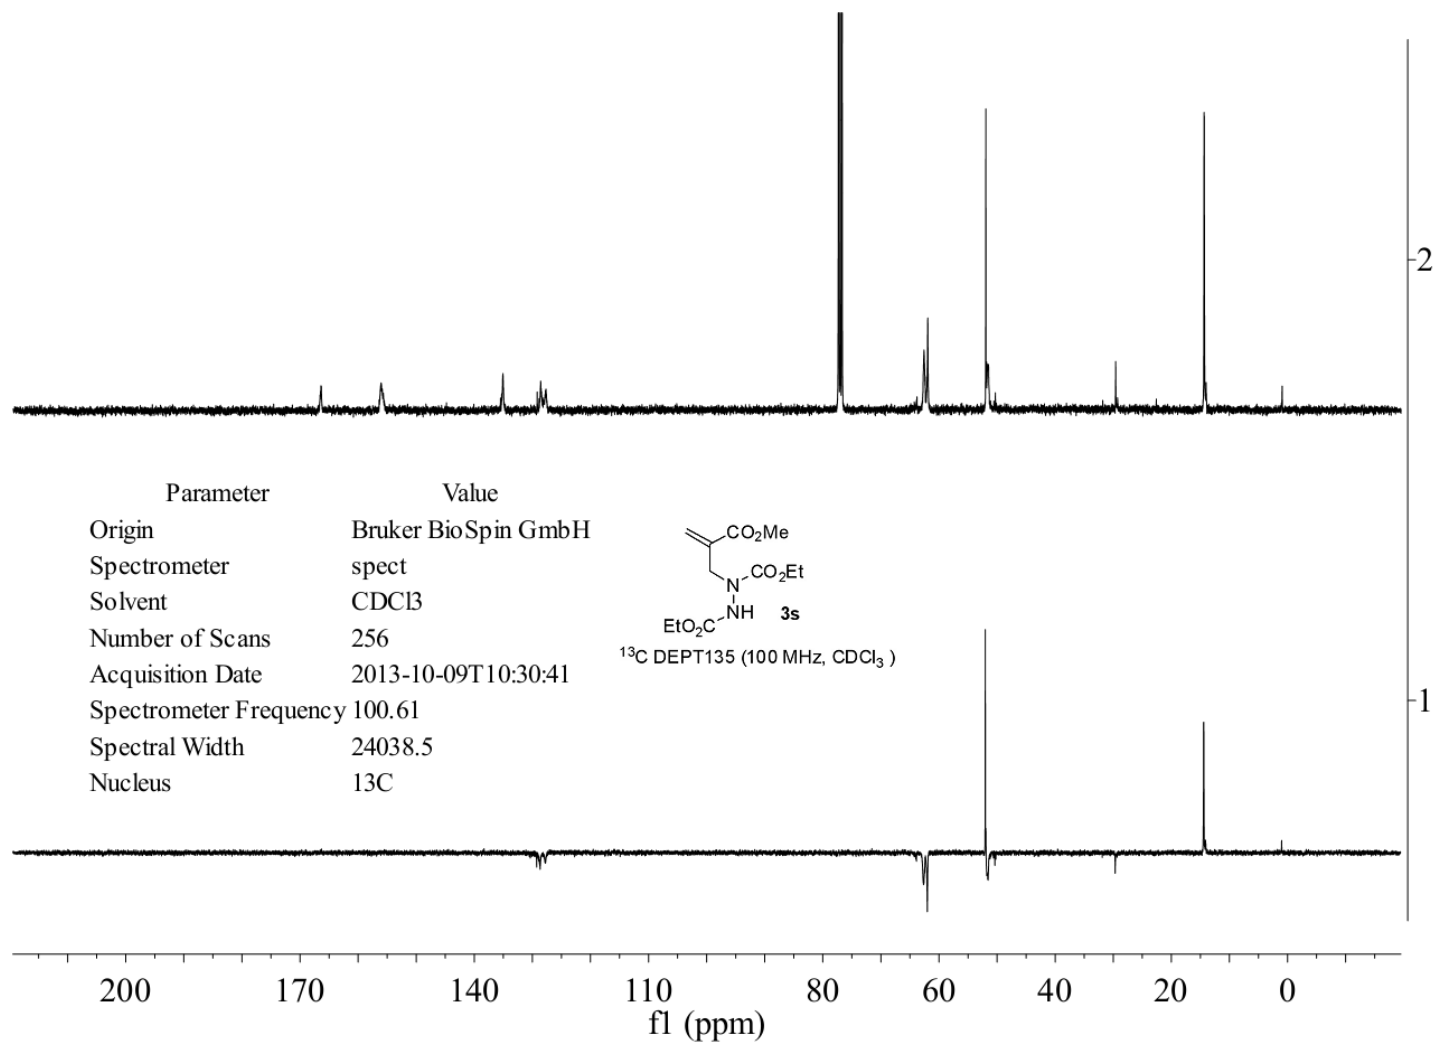

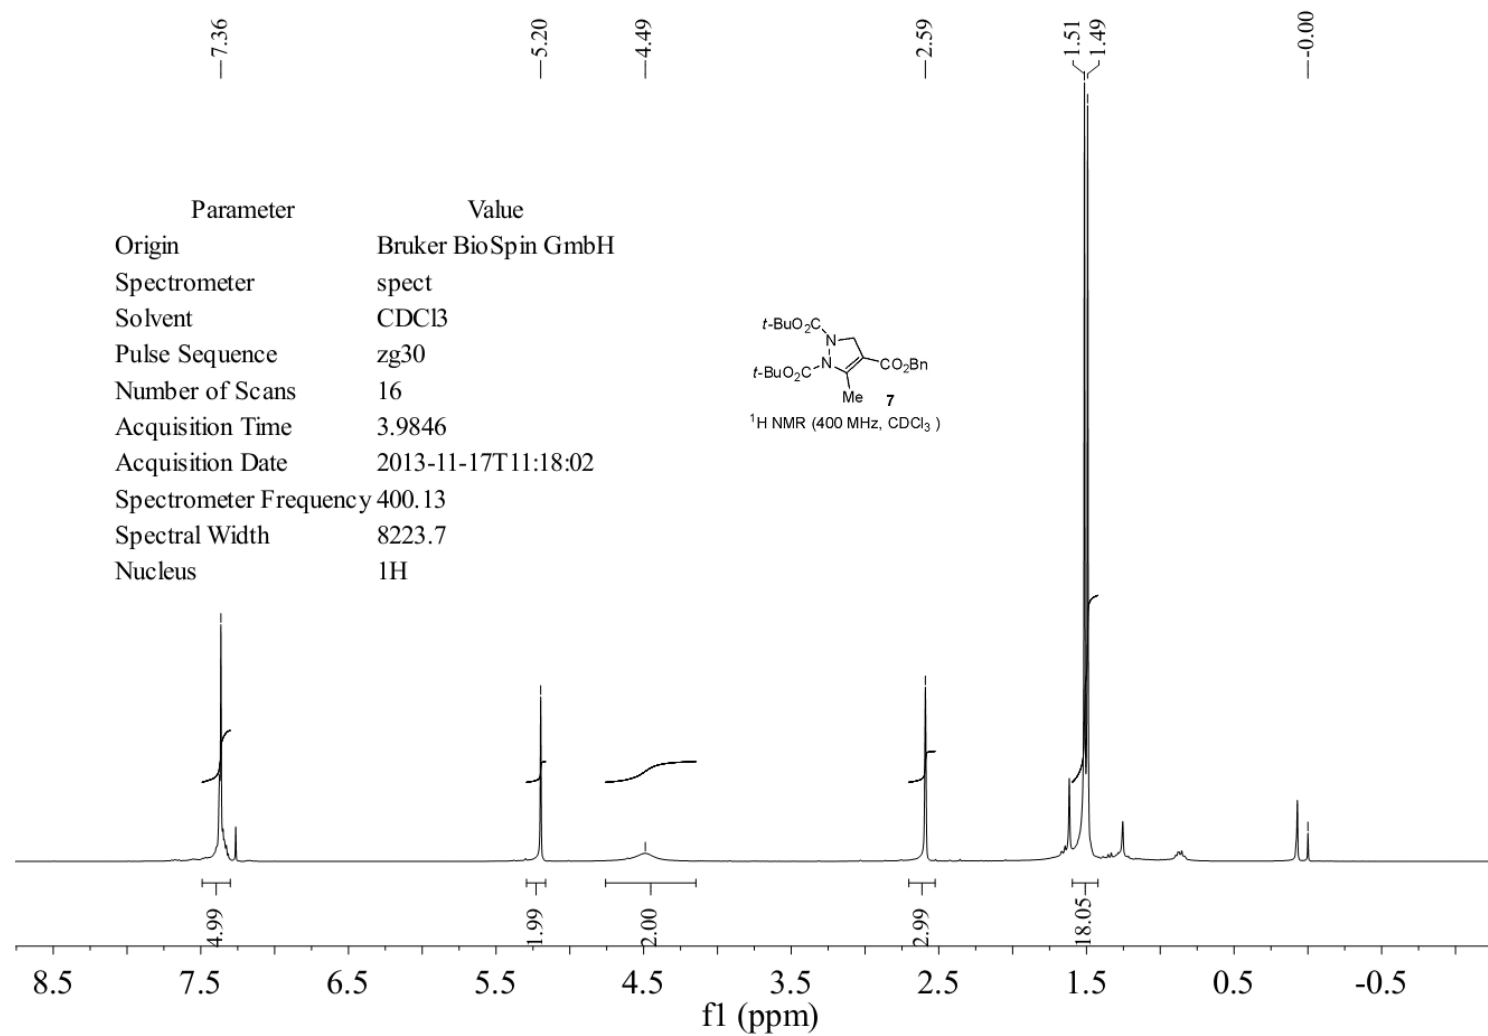

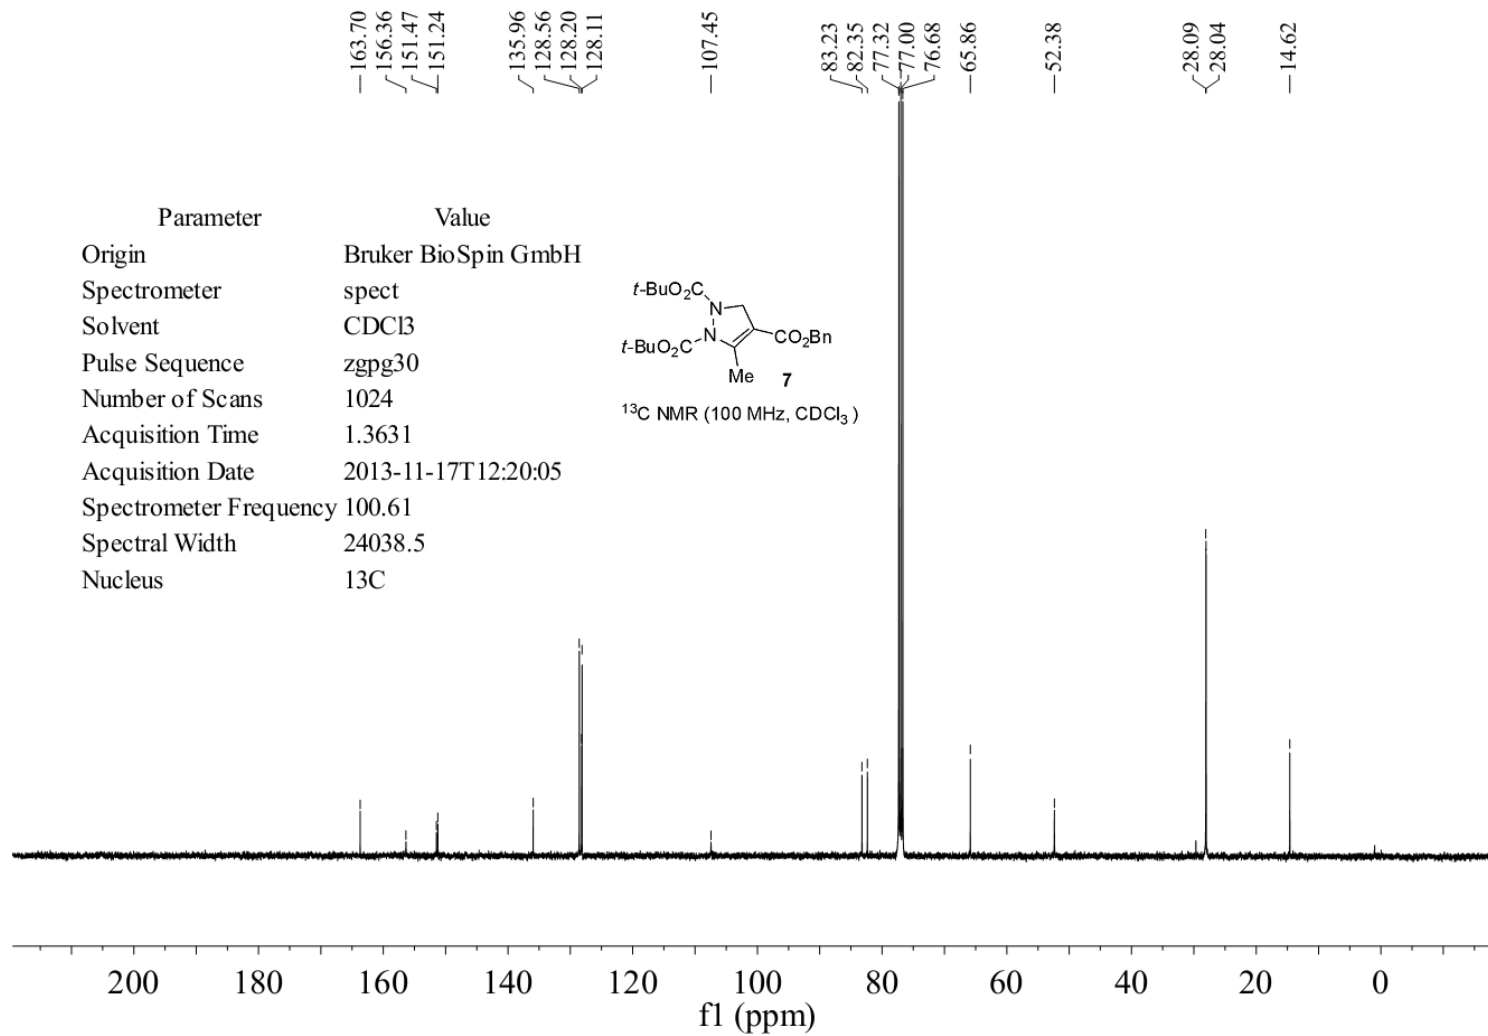

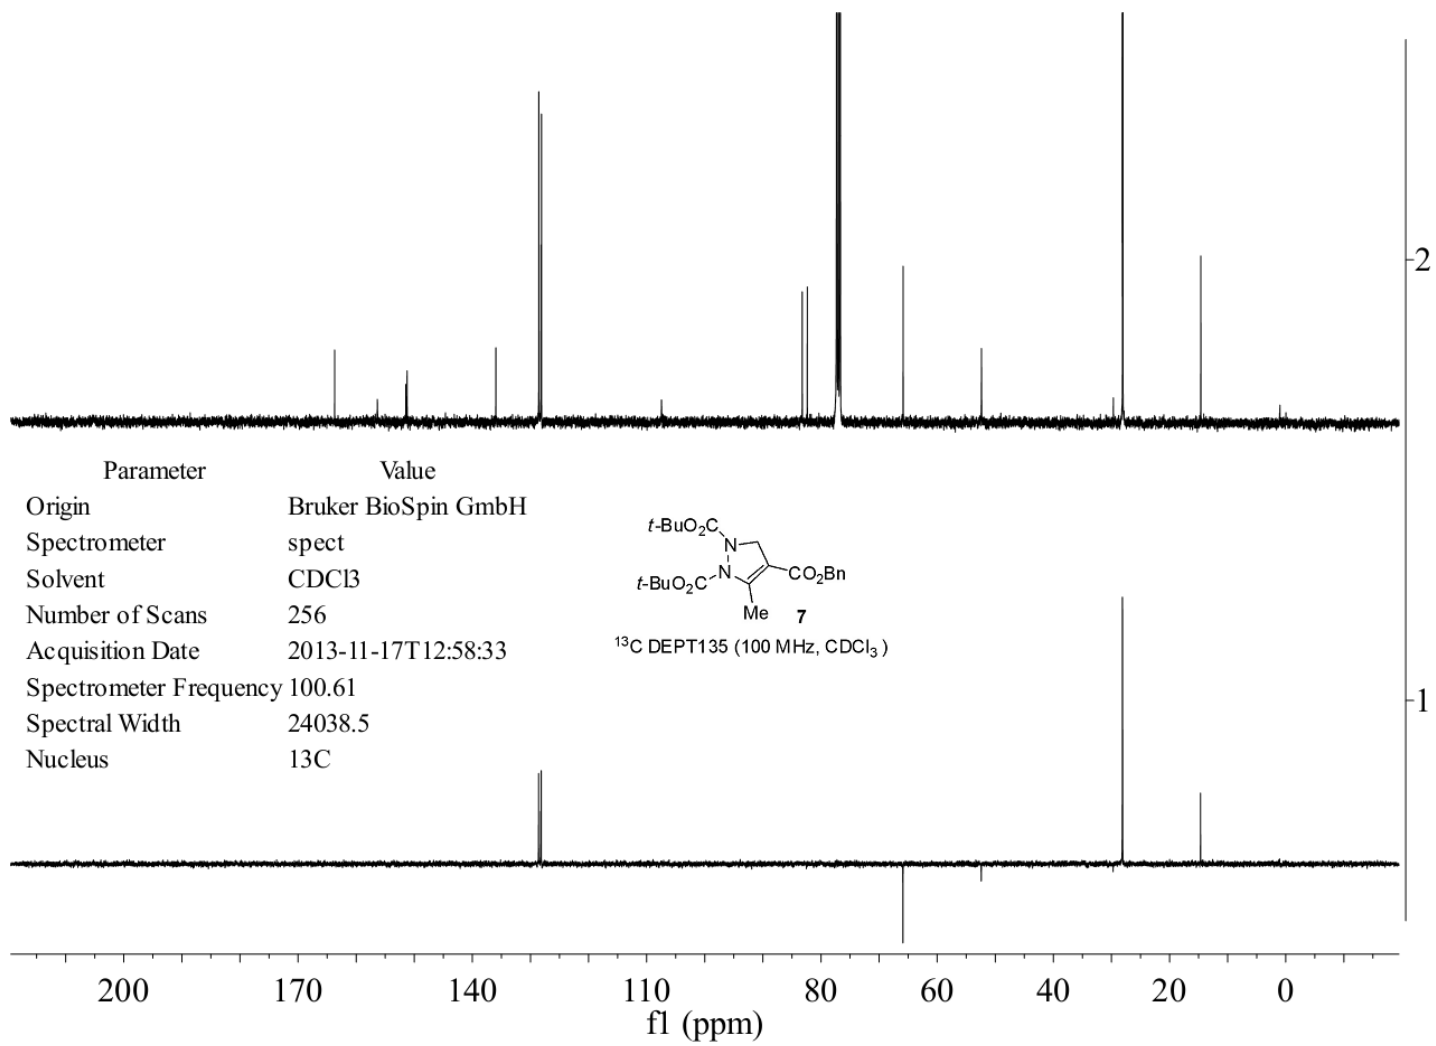

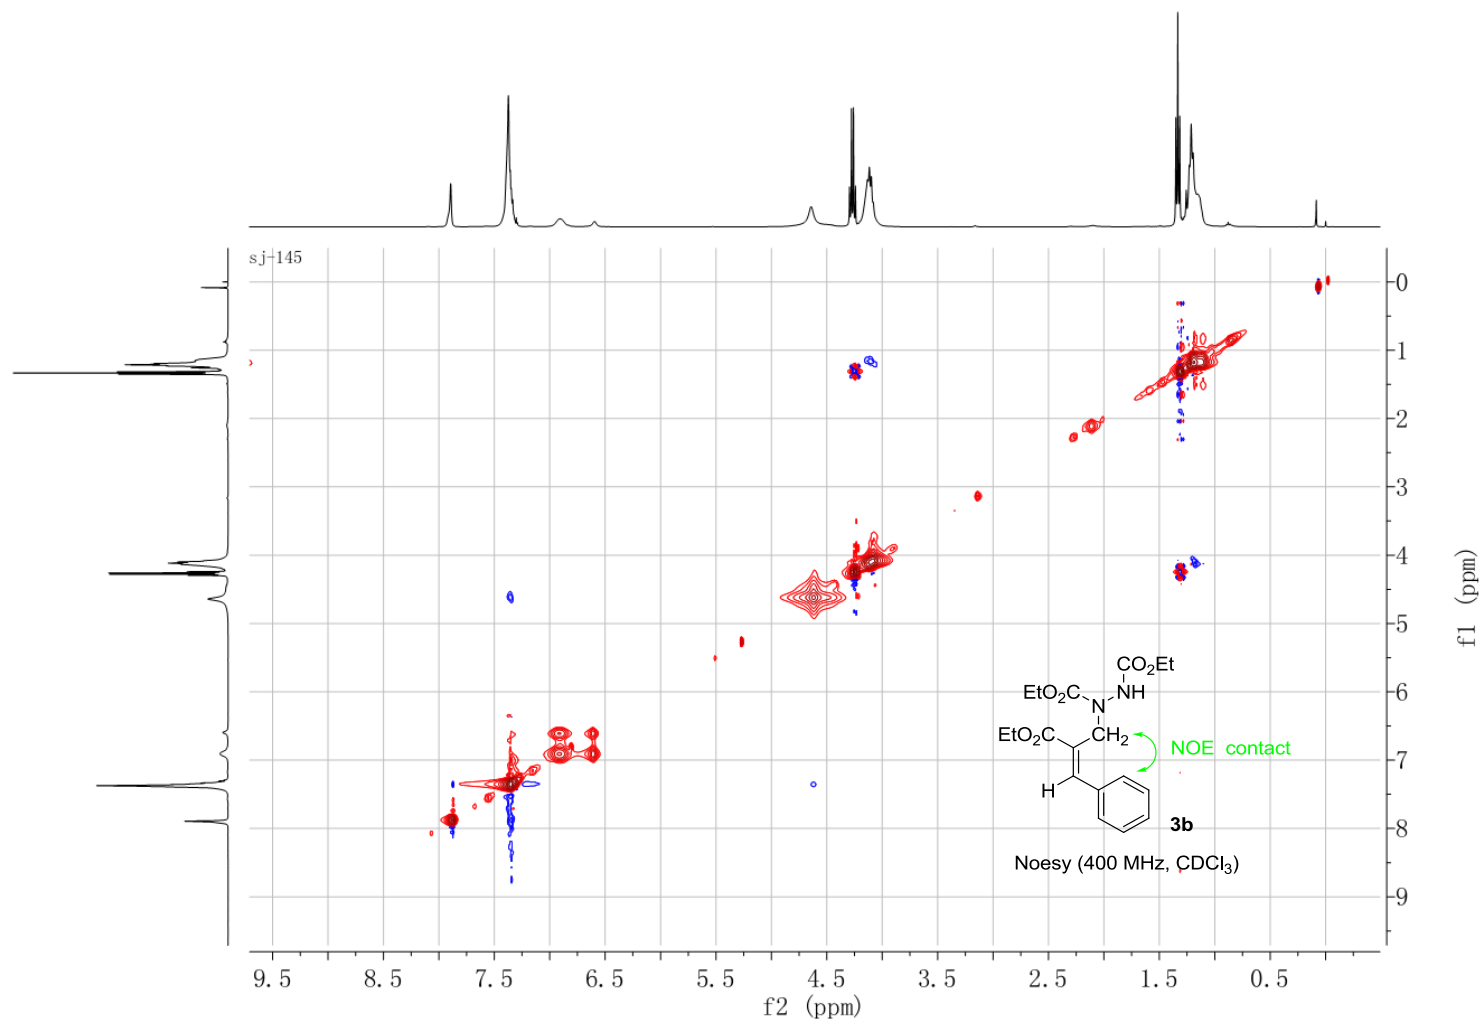

Supplement: Additional file 1 [file 1860-5397-10-98-S1.pdf]
